# Supplementary material
Source: PubMed Central journal article supplement (PMC3063707)
Supplement: NIHMS116228-supplement-1_si_001.pdf [file NIHMS116228-supplement-1_si_001.pdf]

Supporting information for:  
**Enantioselective Total Synthesis of All of the Known Chiral Cleroindicins, (C-F): Clarification Among Optical Rotations and Assignments**

*Todd A. Wenderski, Shenlin Huang, and Thomas R. R. Pettus\**

Department of Chemistry and Biochemistry, University of California at Santa Barbara, Santa Barbara CA 93106.

*pettus@chem.ucsb.edu*

**Table of Contents**

- I. General Techniques, page S1-S2**
- II. Experimental Procedures and spectral data, pages S2 – S10**
- III. Revised Biosynthetic Pathway, page S11**
- IV. HPLC traces, <sup>1</sup>H NMR spectra, <sup>13</sup>C NMR spectra, IR spectra**
  - A. HPLC traces, pages S12 – S17**
  - B. NMR and IR spectra, pages S18 – S59**
- V. References, page S59**

**I. General Techniques** – In reactions, where water was *not* present as solvent, reagent, or by-product, vessels were flame-dried under a slow nitrogen flow. A slight positive pressure of dry nitrogen was maintained via rubber septum seal during the course of the reaction. The nitrogen stream originated from a regulated high pressure 55 L N<sub>2</sub> (*l*) tank and was further dried by passage through a tube filled with CaSO<sub>4</sub>. Reagents were purified according to the procedures described in *Purification of Laboratory Chemicals* (W.L. F. Armarego and C. L. L. Chai).

Reactions were monitored by analytical thin-layer chromatography on hard layer silica gel-60<sup>F-250</sup> plates cut into 1x2.5cm pieces. Visualization was effected by ultraviolet light (254 nm), followed by staining (Seebach, permanganate, or I<sub>2</sub> followed by PMA) the plate, followed by drying with a heat gun or on a micro-hot plate. The Seebach stain was made with 25 g of phosphomolybdic acid, 10 g of cerium sulfate, 60 mL H<sub>2</sub>SO<sub>4</sub>, and 940 mL of H<sub>2</sub>O. The potassium permanganate stain was made with 200 mL H<sub>2</sub>O, 1.33 g KMnO<sub>4</sub>, 13.33 g of K<sub>2</sub>CO<sub>3</sub>, and 4 mL of 5% NaOH. I<sub>2</sub> stain consisted of a chamber containing I<sub>2</sub> impregnated silica gel. PMA (phosphomolybdic acid) stain was made by dissolving 10 g of phosphomolybdic acid in 100 mL of absolute ethanol.

All reactions were stirred with PTFE coated magnetic stir bars and magnetic stirrers. Removal of solvents was typically accomplished using a rotary evaporator connected to a vacuum pump. The condenser was cooled to 0 °C by a chiller circulator bath. If the product was non-volatile, trace solvents were removed using a freeze dryer system at a pressure of approximately 0.01 mmHg.

For distillation, a specific low pressure (760 – 1 mm Hg) was obtained and monitored with a vacuum controller in combination with a direct drive pump. Bulb-to-bulb distillation was performed using a glass oven. Chromatography was performed following the method used by W. C. Still (*J. Org. Chem.* **1977**, *42*, 1258-1259).

Deuterated chloroform was filtered through basic alumina prior to use. Solvents were distilled before use, under a slight positive pressure of nitrogen. Diethyl ether, tetrahydrofuran, benzene, and toluene were distilled from sodium and benzophenone. Dichloromethane and nitromethane were distilled from CaH<sub>2</sub>. Atmosphere (1 atm) hydrogenations were carried out using a balloon.

<sup>1</sup>H-NMR spectra were recorded using a 400 MHz or 500 MHz spectrometer. Chemical shifts are reported in ppm from tetramethylsilane with the solvent resonance of CDCl<sub>3</sub> (7.27 ppm). <sup>13</sup>C NMR spectra were recorded at 100 MHz or 125 MHz with a solvent resonance of CDCl<sub>3</sub> (77.23 ppm). Infrared spectra were recorded on a Fourier transform infrared spectrometer with 2 cm resolution as a neat sample on a NaCl plate. Infrared frequencies are reported in reciprocal centimeters (cm<sup>-1</sup>). Silica columns for HPLC, were 25 cm long in length and contained 5 μm spherisorb. Mass spectra were recorded at an ionizing voltage of either 70 or 20 eV.

## II. Additional Experimental Procedures

### (*S*)-2-Bromo-3-(1-(methoxy(methyl)amino)-1-oxopropan-2-yloxy)-4-(2-(2-(trimethylsilyl)ethoxy)ethyl)phenyl *tert*-butyl carbonate (**13**).

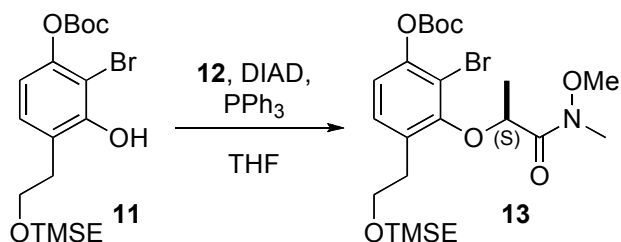

Diisopropyl azodicarboxylate (DIAD) (0.86 mL, 4.39 mmol) was added dropwise to a stirring solution of triphenylphosphine (PPh<sub>3</sub>) (1.151 g, 4.39 mmol) in THF (14 mL) at 0 °C. The resulting suspension was stirred at 0 °C to rt for 1 h. The mixture was cooled to 0 °C and a solution of phenol **11** (1.267 g, 2.92 mmol) in THF (9 mL) was added via cannula followed by a solution of (*R*)-2-hydroxy-*N*-methoxy-*N*-methylpropanamide **12** (0.430 g, 3.22 mmol) in THF (6 mL). The reaction was stirred at 0 °C to rt for 24 h. Afterwards, the reaction mixture was concentrated under reduced pressure. The crude residue was purified by column chromatography with 15% EtOAc/hexanes (*R<sub>f</sub>* = 0.2) to afford colorless oil **13** (1.39 g, 2.54 mmol, 87% yield). <sup>1</sup>H NMR (400 MHz, CDCl<sub>3</sub>) δ 7.26 (d, *J* = 8 Hz, 1H), 6.92 (d, *J* = 8.4 Hz, 1H), 5.32 (q, *J* = 6.4 Hz, 1H), 3.58 (t, *J* = 6.8 Hz, 2H), 3.52 (s, 3H), 3.50 (t, *J* = 8 Hz, 2H), 3.17 (s, 3H), 3.10 (m, 1H), 2.97 (m, 1H), 1.55 (s, 9H), 1.54 (d, *J* = 6.8 Hz, 3H), 0.90 (t, *J* = 8 Hz, 2H), -0.02 (s, 9H); <sup>13</sup>C NMR (100 MHz, CDCl<sub>3</sub>) δ 172.0, 154.4, 151.0, 147.9, 133.3, 129.9, 118.7, 112.1, 84.2, 75.0, 70.0, 68.1, 61.7, 32.4, 30.8, 27.8, 18.3, 18.0, -1.2; IR (thin film) 2980, 2951, 2939, 2895, 2858, 1765, 1678, 1153 cm<sup>-1</sup>; HRMS (ESI) calcd for C<sub>23</sub>H<sub>38</sub>BrNO<sub>7</sub>SiNa: 570.1499. Found 570.1504.

### (*S*)-2-(2-Bromo-3-hydroxy-6-(2-(2-(trimethylsilyl)ethoxy)ethyl)phenoxy)-*N*-methoxy-*N*-methylpropanamide (**14**).

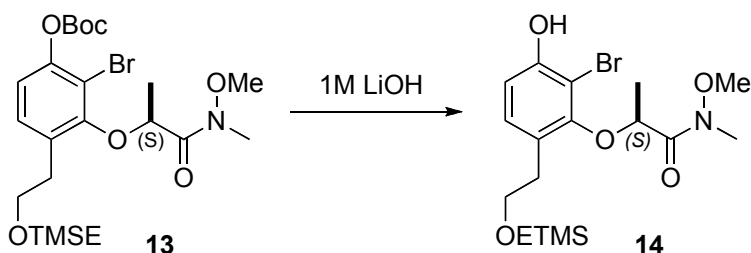

To a stirring solution of *tert*-butyl carbonate **13** (2.156 g, 3.93 mmol) in THF/MeOH (60 mL/40 mL) at 0 °C, 1M aq LiOH (22 mL, 22 mmol) was added in one portion. The reaction was stirred at 0 °C to room temperature for 8 hours. The reaction was then quenched with 1M HCl and extracted with EtOAc four times. The combined

organic layer was washed with water, brine, and dried with Na<sub>2</sub>SO<sub>4</sub>. The filtered solution was concentrated and the crude residue was purified by chromatography with 25% EtOAc/hexanes (*R<sub>f</sub>* = 0.2) to afford colorless oil **14** (1.67 g, 3.73 mmol, 95% yield). <sup>1</sup>H NMR (400 MHz, CDCl<sub>3</sub>) δ 7.07 (d, *J* = 8.4 Hz, 1H), 6.73 (d, *J* = 8.4 Hz, 1H), 6.57 (s, 1H), 5.19 (q, *J* = 6 Hz, 1H), 3.55 (s, 3H), 3.55 (t, 2H), 3.50 (t, *J* = 9.6 Hz, 2H), 3.19 (s, 3H), 2.97 (m, 2H), 1.51 (d, *J* = 6.4 Hz, 3H), 0.92 (t, *J* = 8.4 Hz, 2H), -0.03 (s, 9H); <sup>13</sup>C NMR (100 MHz, CDCl<sub>3</sub>) δ 172.3, 153.6, 152.6, 130.1, 126.3, 111.9, 105.9, 75.2, 70.3, 68.1, 61.6, 32.5, 30.5, 18.3, 18.0, -1.3; IR (thin film) 2951, 2893, 2862, 1651, 1431, 1076 cm<sup>-1</sup>; HRMS (ESI) calcd for C<sub>18</sub>H<sub>30</sub>BrNO<sub>5</sub>SiNa: 470.0974. Found 470.0986.

**(3*S*,4*aS*,5*R*,8*aR*)-5-Bromo-3-methyl-8*a*-(2-(2-(trimethylsilyl)ethoxy)ethyl)-4*a*,5-dihydrobenzo[*b*][1,4]dioxine-2,6(3*H*,8*aH*)-dione (16).**

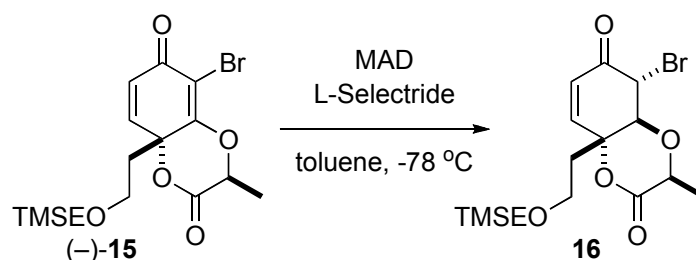

To a flame dried flask equipped with a stir bar, was charged with 2,6-di-*tert*-butyl-4-methylphenol (BHT) (0.534 g, 2.43 mmol), and toluene (5 mL). The solution was cooled to 0 °C and AlMe<sub>3</sub> (1.4 M in hexanes, 0.87 mL, 1.21 mmol) was added. The resulting mixture of methylaluminum bis(2,6-di-*tert*-butyl-4-methylphenoxide) (MAD) was stirred at 0 °C to room temperature for 1 h, then cooled to -78 °C. In a separate flask, dienone **15** (0.196 g, 0.485 mmol) was dissolved in toluene (1.2 mL), and the solution was added via cannula to the MAD at -78 °C, immediately turning deep purple. The reaction was stirred for 5 min, then L-Selectride (1M in THF, 0.5 mL, 0.5 mmol) was added, and the solution was stirred for another 5 min at -78 °C. The reaction mixture was quenched with 1M aq Rochelle's salt, diluted with EtOAc, and quickly warmed by hand to rt. It was stirred vigorously for 1 h. The aqueous layer was extracted with EtOAc and the combined organics were washed with brine, dried (Na<sub>2</sub>SO<sub>4</sub>), and concentrated. The residue was purified by flash chromatography with 15% EtOAc/hexanes (*R<sub>f</sub>* = 0.2) to give **16** as colorless oil (0.163 g, 0.403 mmol, 83% yield). <sup>1</sup>H NMR (400 MHz, CDCl<sub>3</sub>) δ 7.16 (d, *J* = 10 Hz, 1H), 6.13 (d, *J* = 10.4 Hz, 1H), 4.62 (q, *J* = 7.2 Hz, 1H), 4.62 (d, *J* = 12 Hz, 1H), 4.13 (d, *J* = 12 Hz, 1H), 3.65 (m, 2H), 3.47 (m, 2H), 2.41 (m, 1H), 2.10 (m, 1H), 1.67 (d, *J* = 7.2 Hz, 3H), 0.89 (t, *J* = 6.8 Hz, 2H), 0.04 (s, 9H); <sup>13</sup>C NMR (100 MHz, CDCl<sub>3</sub>) δ 188.8, 169.0, 149.9, 126.9, 82.0, 80.5, 74.6, 68.7, 64.0, 50.0, 37.2, 18.3, -1.2; IR (thin film) 2951, 2870, 1755, 1686, 1246, 1099 cm<sup>-1</sup>; HRMS (ESI) calcd for C<sub>16</sub>H<sub>25</sub>BrO<sub>5</sub>SiNa: 427.0552. Found 427.0550.

**(2*S*,4*1R*,7*aS*,10*R*,10*aS*)-10-Bromo-2-methyltetrahydro-2*H*-benzofuro[4-*b*][1,4]dioxine-3,9(10*H*,10*aH*)-dione (17).**

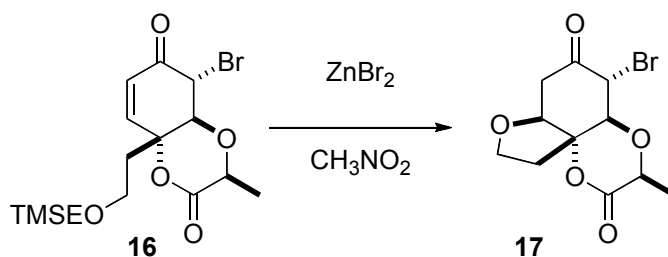

ZnBr<sub>2</sub> (89 mg, 0.40 mmol) was added to a stirring solution of **16** (41 mg, 0.1 mmol) in CH<sub>3</sub>NO<sub>2</sub> (1.3 mL). The reaction was stirred for 24 h at room temperature. The reaction was quenched with 1 M HCl and extracted with EtOAc four times. The combined organic layer was washed with NaHCO<sub>3</sub> (aq), brine, dried (Na<sub>2</sub>SO<sub>4</sub>), and filtered. The solution was concentrated and the crude residue was purified by chromatography with 15% EtOAc/hexanes to afford colorless oil **17** (25 mg, 0.080 mmol, 80% yield). <sup>1</sup>H NMR (400 MHz, CDCl<sub>3</sub>) δ 4.65 (q, *J* = 7.2 Hz, 1H), 4.34 (dd, *J* = 2 Hz, *J* = 4.8 Hz, 1H), 4.30 (d, *J* = 10.4 Hz, 1H), 4.12 (d, *J* = 10.4 Hz, 1H), 4.06 (m, 1H), 3.88 (m, 1H), 2.96 (dd, *J* = 4.8 Hz, *J* = 15.2 Hz, 1H), 2.84 (dd, *J* = 0.8 Hz, *J* = 16.4 Hz, 1H), 2.13 (m, 2H), 1.66 (d, *J* = 7.2 Hz, 3H); <sup>13</sup>C NMR (100 MHz, CDCl<sub>3</sub>) δ 198.4, 168.6, 89.1, 79.8, 78.3, 74.3, 66.3, 45.4, 42.0, 36.4, 18.5; IR (thin film) 2986, 2922, 2953, 2872, 2854, 1736, 1244, 1203, 1122 cm<sup>-1</sup>; [α]<sub>D</sub><sup>25</sup> = -78.5 (CHCl<sub>3</sub>, *c* = 1.2). HRMS (EI) calcd for C<sub>11</sub>H<sub>13</sub>BrO<sub>5</sub>: 303.9946. Found 303.9953.

#### 5-hydroxy-9-((*S*)-1-oxo-1-(pyrrolidin-1-yl)propan-2-yloxy)-2-oxabicyclo[3.3.1]non-6-en-8-one (**19**).

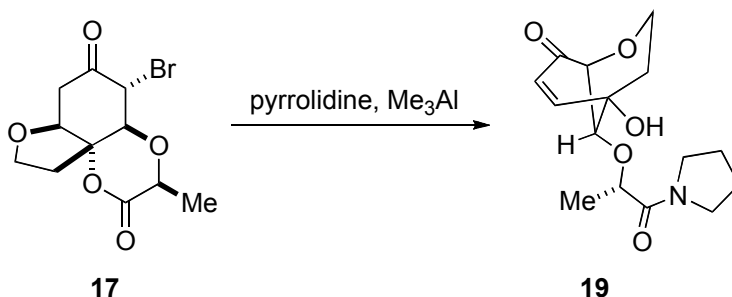

A solution of pyrrolidine (8.3 μL, 0.098 mmol) in CH<sub>2</sub>Cl<sub>2</sub> (1.0 mL) was cooled to 0 °C and AlMe<sub>3</sub> (25% wt/wt in hexanes, 43 μL, 0.098 mmol) was added dropwise. The solution was stirred for 1 h, and allowed to slowly warm to room temperature. It was cooled to 0 °C and the dione **17** (10 mg, 0.033 mmol) as a solution in CH<sub>2</sub>Cl<sub>2</sub> (0.5 mL) was added to the aluminum amide via cannula. The reaction was stirred from 0 °C to rt for 24 h. It was quenched with 1M Rochelle's salt (2 mL), diluted in EtOAc (3mL) and stirred vigorously for 1 h. The aqueous layer was extracted with EtOAc (4 x 3 mL), and the combined organics were washed with brine (2 mL), dried (Na<sub>2</sub>SO<sub>4</sub>), and concentrated. Flash chromatography of the residue (20% EtOAc/hexanes, R<sub>f</sub> = 0.3) yielded colorless oil **19** (5.4 mg, 0.018 mmol, 55% yield). <sup>1</sup>H NMR (500 MHz, CDCl<sub>3</sub>) δ 7.05 (d, *J* = 10.5 Hz, 1H), 6.37 (s, 1H), 6.26 (d, *J* = 10 Hz, 1H), 4.30 (q, *J* = 6.5 Hz, 1H), 4.13 (s, 1H), 3.94 (dd, *J* = 5.5 Hz, *J* = 12 Hz, 2H), 3.58 (m, 2H), 3.47 (m, 2H), 3.38 (s, 1H), 3.33 (m, 1H), 2.57 (dt, *J* = 6 Hz, *J* = 13 Hz, 1H), 2.01 (m, 3H), 1.91 (m, 2H), 1.49 (d, *J* = 6.5 Hz, 3H); HRMS (ESI) calcd for C<sub>15</sub>H<sub>21</sub>NO<sub>5</sub>Na: 318.1317. Found 318.1310.

#### (2*S*,4*1R*,7*aS*,10*aR*)-2-Methyltetrahydro-2*H*-benzofuro[4-*b*][1,4]dioxine-3,9(10*H*,10*aH*)-dione (**20**).

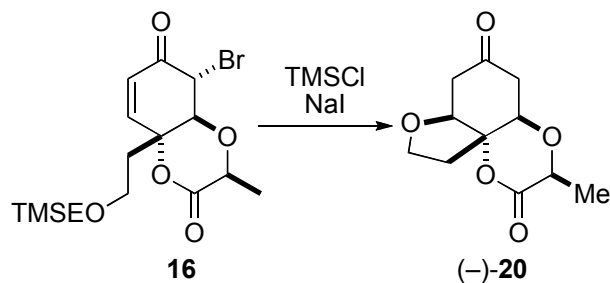

To a solution of **16** (0.142 g, 0.35 mmol) in  $\text{CH}_3\text{CN}$  (5.8 mL) was added NaI (0.633 g, 4.2 mmol), followed by TMSCl (0.36 mL, 2.8 mmol). The resulting orange solution was stirred at room temperature for 24 hours then quenched with saturated aq  $\text{Na}_2\text{S}_2\text{O}_3$ . The colorless solution was diluted with EtOAc, separated and the aqueous layer was extracted with EtOAc four times. The combined organics were washed with brine, dried ( $\text{Na}_2\text{SO}_4$ ), and concentrated. The crude material was purified by flash chromatography with 35% EtOAc/hexanes ( $R_f = 0.25$ ) to afford **20** as a colorless oil (77 mg, 0.34 mmol, 97% yield).  $^1\text{H}$  NMR (500 MHz,  $\text{CDCl}_3$ ):  $\delta$  4.58 (q,  $J = 7$  Hz, 1H), 4.28 (dd,  $J = 6$  Hz,  $J = 12.5$  Hz, 1H), 4.27 (d,  $J = 2$  Hz, 1H), 4.05 (t,  $J = 8$  Hz, 1H), 3.87 (m, 1H), 2.84 (dd,  $J = 6$  Hz,  $J = 19$  Hz, 1H), 2.74 (dd,  $J = 2$  Hz,  $J = 16$  Hz, 1H), 2.68 (dd,  $J = 4.5$  Hz,  $J = 16.5$  Hz, 1H), 2.36 (dd,  $J = 12.5$  Hz,  $J = 19$  Hz, 1H), 2.33 (m, 1H), 2.05 (dd,  $J = 4.5$  Hz,  $J = 14$  Hz, 1H), 1.60 (d,  $J = 7$  Hz, 3H);  $^{13}\text{C}$  NMR (125 MHz,  $\text{CDCl}_3$ ):  $\delta$  204.0, 169.6, 89.6, 80.2, 73.9, 72.1, 66.2, 43.9, 40.0, 36.0, 18.6; IR (neat): 2986, 2889, 1728  $\text{cm}^{-1}$ ; HRMS (EI):  $m/z$  calcd for  $\text{C}_{11}\text{H}_{14}\text{O}_5$ : 226.0841. found 226.0837.  $[\alpha]_D^{25} = -123.9$  ( $\text{CHCl}_3$ ,  $c = 1.0$ ).

**(3a*R*,4*R*,6*R*,7a*S*)-4-((*S,E*)-1-(2,2-dimethylhydrazono)propan-2-yloxy)octahydrobenzofuran-3a,6-diol** (**[22]**).

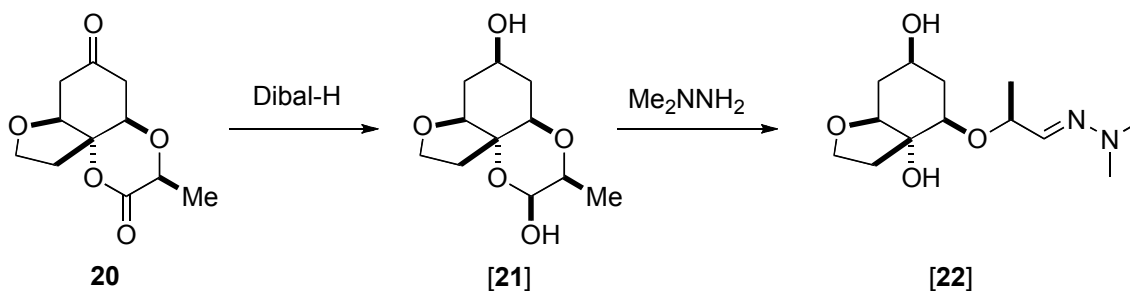

To a solution of **20** (5.0 mg, 0.022 mmol) in  $\text{CH}_2\text{Cl}_2$  (0.3 mL) cooled to  $-78$  °C was added DIBAL-H (1M in hexanes, 0.09 mL, 0.09 mmol) and the solution was stirred for 1 h. The reaction mixture was quenched with 1M aq Rochelle's salt, diluted with  $\text{CH}_2\text{Cl}_2$ , quickly warmed to room temperature and stirred vigorously for 45 min. The aqueous layer was extracted with  $\text{CH}_2\text{Cl}_2$ . The combined organics were washed with brine, dried with  $\text{Na}_2\text{SO}_4$ , and concentrated.

To a solution of the crude **21** (5.0 mg) in  $\text{CH}_2\text{Cl}_2$  (0.3 mL) was added  $\text{H}_2\text{NNMe}_2$  (4  $\mu\text{L}$ , 0.09 mmol). The reaction was stirred at room temperature for 4 h, then concentrated under reduced pressure to afford the hydrazone **22**, which was taken on crude in following manipulations.

**(2'*S*,41'*R*,7a'*S*,10a'*R*)-2'-Methyl-1,5,5',6',7a',8',10',10a'-octahydrospiro[benzo[*e*][1,3]dioxepine-3,9'-benzofuro[4-*b*][1,4]dioxin]-3'(2'*H*)-one** (**24**).

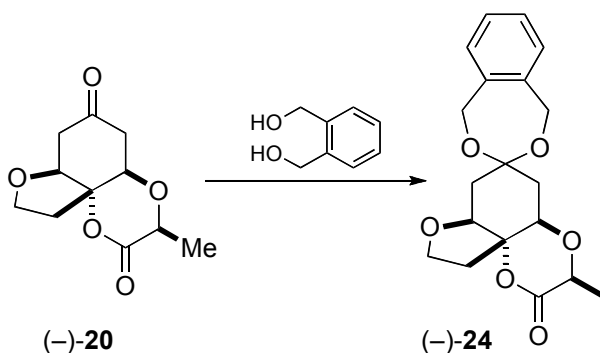

To a solution of 1,2-benzenedimethanol (32 mg, 0.23 mmol, 1.1 equiv) and ketone **20** (48 mg, 0.212 mmol, 1 equiv) in benzene (2 mL) was added catalytic *p*-toluene sulfonic acid hydrate. The resulting mixture was heated at reflux for 24 h with azeotropic removal of water by a Dean-Stark trap. After cooling to room temperature, the reaction mixture was diluted with CH<sub>2</sub>Cl<sub>2</sub>, quenched with NaHCO<sub>3</sub> (saturated), and extracted with CH<sub>2</sub>Cl<sub>2</sub> (4x). The organic phase was dried over sodium sulfate and concentrated under reduced pressure. The crude product was purified by flash chromatography (35% EtOAc/hexanes, R<sub>f</sub> = 0.3) to provide the ketal-lactone **24** as a colorless oil (62.4 mg, 0.18 mmol, 85% yield). <sup>1</sup>H NMR (400 MHz, CDCl<sub>3</sub>) δ 7.22 (m, 2H), 7.10 (m, 2H), 4.90 (m, 4H), 4.60 (q, *J* = 7.2 Hz, 1H), 4.18 (m, 4H), 2.58 (m, 2H), 2.06 (m, 1H), 1.75 (m, 1H), 1.60 (d, *J* = 6.8 Hz, 3H), 1.50 (m, 2H); <sup>13</sup>C NMR (100 MHz, CDCl<sub>3</sub>) δ 170.2, 137.5, 137.3, 127.3, 126.4, 101.8, 91.3, 78.4, 74.5, 72.6, 65.5, 65.3, 65.0, 36.1, 33.9, 32.9, 18.7; IR (thin film) 2955, 2920, 2897, 2851, 1744, 1091 cm<sup>-1</sup>; HRMS (ESI) calcd for C<sub>19</sub>H<sub>22</sub>O<sub>6</sub>Na: 369.1314. Found 369.1308. [α]<sub>D</sub><sup>25</sup> = +13.5 (CHCl<sub>3</sub>, c = 0.5).

**(3a'S,4'R,7a'S)-1,3',3a',4',5,5',7',7a'-Octahydro-2'H-spiro[benzo[e][1,3]dioxepine-3,6'-benzofuran]-3a',4'-diol (**25**).**

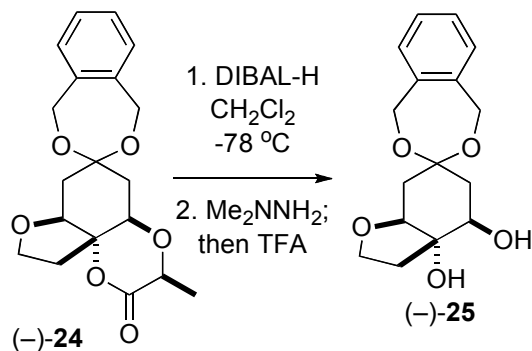

To a solution of **24** (0.011 g, 0.033 mmol) in CH<sub>2</sub>Cl<sub>2</sub> (0.4 mL) cooled to -78 °C was added DIBAL-H (1M in hexanes, 0.07 mL, 0.07 mmol) and the solution was stirred for 1 h. The reaction mixture was quenched with 1M Rochelle's salt, dilute with CH<sub>2</sub>Cl<sub>2</sub>, quickly warmed to room temperature and stirred vigorously for 45 minutes. The aqueous layer was extracted with CH<sub>2</sub>Cl<sub>2</sub>. The combined organics were washed with brine, dried with Na<sub>2</sub>SO<sub>4</sub>, and concentrated.

To a solution of the crude reaction material in CH<sub>2</sub>Cl<sub>2</sub> (0.4 mL) was added H<sub>2</sub>NNMe<sub>2</sub> (4 μL, 0.09 mmol). The reaction was stirred at room temperature for 4 h, and then TFA (cat.) was added to the solution. After 3 h, the reaction mixture was concentrated and the residue was purified by flash chromatography with EtOAc (R<sub>f</sub> = 0.25) to yield **25** (7.2 mg, 0.025 mmol, 75% yield, > 99% ee). Enantiomeric ratio was measured by HPLC (Chiralcel OD-H, 15% IPA/Hexanes, *t*<sub>R1</sub> = 15.47 min, *t*<sub>R2</sub> = 19.00 min). <sup>1</sup>H NMR (400 MHz, C<sub>5</sub>D<sub>5</sub>N) δ 7.09 (m, 1H), 7.03 (m, 1H), 7.00 (m, 1H), 6.80 (m, 1H), 4.96 (m, 2H), 4.82 (m, 3H), 4.53 (dd, *J* = 6.8 Hz, *J* = 10.4 Hz, 1H), 4.41 (dd, *J* = 8.4 Hz, *J* = 16.8 Hz, 1H), 4.20 (m, 1H), 2.88 (m, 1H), 2.66 (m, 2H), 2.43 (m, 1H), 2.10 (t, *J* =

12.8 Hz, 1H), 1.77 (m, 1H);  $^{13}\text{C}$  NMR (100 MHz,  $\text{C}_5\text{D}_5\text{N}$ )  $\delta$  139.2, 138.9, 127.4, 126.9, 126.8, 102.9, 84.6, 82.7, 72.5, 66.4, 65.1, 65.0, 38.2, 37.3, 33.1; IR (thin film) 3429, 2951, 2920, 2851, 1076  $\text{cm}^{-1}$ ; HRMS (ESI) calcd for  $\text{C}_{16}\text{H}_{20}\text{O}_5\text{Na}$ : 315.1208. Found 315.1211.  $[\alpha]_{\text{D}}^{25} = -17.5$  ( $\text{CHCl}_3$ ,  $c = 0.75$ ).

### Epoxide 26.

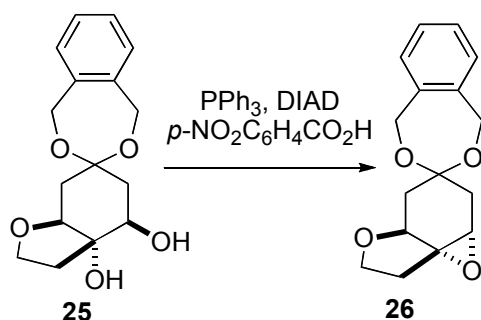

To a solution of 4-nitrobenzoic acid (14.9 mg, 0.089 mmol) and diol **25** (6.5 mg, 0.022 mmol) in anhydrous THF (0.5 mL) at 0 °C, was added triphenylphosphine (23.3 mg, 0.089 mmol), DIAD (0.017 mL, 0.089 mmol). The reaction was stirred at rt for 16 h and then the reaction mixture was diluted with diethyl ether. The solution was washed with saturated aq  $\text{NaHCO}_3$ , then brine. The organic layer was dried with  $\text{Na}_2\text{SO}_4$ , filtered and concentrated under reduced pressure. The residue was purified by column chromatography to afford epoxide **26** as colorless oil (4.9 mg, 0.018 mmol, 80% yield).  $^1\text{H}$  NMR (400 MHz,  $\text{CDCl}_3$ )  $\delta$  7.18 (m, 2H), 7.06 (m, 2H), 4.88 (m, 4H), 4.08 (dt,  $J = 4.5$  Hz,  $J = 8$  Hz, 1H), 3.98 (m, 2H), 3.45 (d,  $J = 3$  Hz, 1H), 2.66 (d,  $J = 15.5$  Hz, 1H), 2.59 (ddd,  $J = 1.5$  Hz,  $J = 5.5$  Hz,  $J = 13$  Hz, 1H), 2.29 (dt,  $J = 8$  Hz,  $J = 13.8$  Hz, 1H), 2.14 (ddd,  $J = 4$  Hz,  $J = 7$  Hz,  $J = 13.5$  Hz, 1H), 2.09 (dd,  $J = 3$  Hz,  $J = 15.5$  Hz, 1H), 1.62 (dd,  $J = 10$  Hz,  $J = 13$  Hz, 1H);  $^{13}\text{C}$  NMR (100 MHz,  $\text{CDCl}_3$ )  $\delta$  138.0, 137.8, 127.1, 127.0, 126.3, 102.3, 74.1, 67.0, 65.8, 65.1, 65.0, 58.4, 34.2, 33.4, 31.4; IR (thin film) 2954, 2920, 2851, 1458, 1076  $\text{cm}^{-1}$ ; HRMS (ESI) calcd for  $\text{C}_{16}\text{H}_{18}\text{O}_4\text{Na}$ : 297.1103. Found 297.1109.

### Acetate (27).

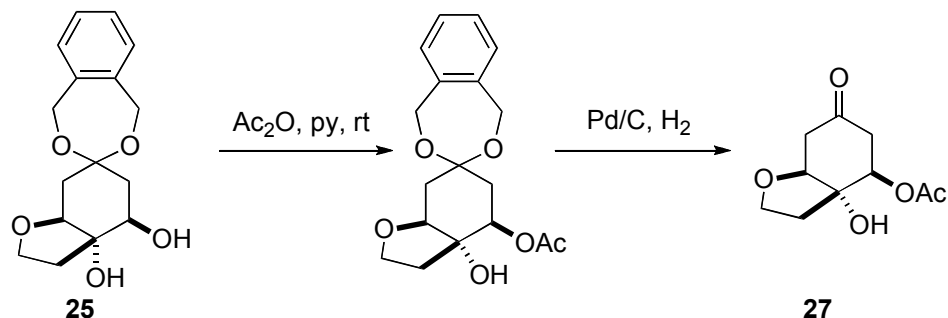

To a solution of diol **25** (5 mg, 0.017 mmol) in pyridine (0.2 mL) was added  $\text{Ac}_2\text{O}$  (2  $\mu\text{L}$ , 0.019 mmol). After 24 h of stirring, the reaction mixture was diluted with  $\text{CH}_2\text{Cl}_2$ , washed with  $\text{CuSO}_4$  (aq), extracted with  $\text{CH}_2\text{Cl}_2$  (4x), washed with water and brine. The organic phase was dried over sodium sulfate and concentrated under reduced pressure. The resulting mono-acetate was carried forward without purification.

A solution of the above mono-acetate in MeOH (0.2 mL) containing 5% Pd/C catalyst (3 mg) was stirred under 1 atm of hydrogen at room temperature for 12 hours. The reaction mixture was filtered through a pad of Celite, and concentrated under reduced pressure to afford the crude product.

### Cleroindicin F (7): Partially racemized method.

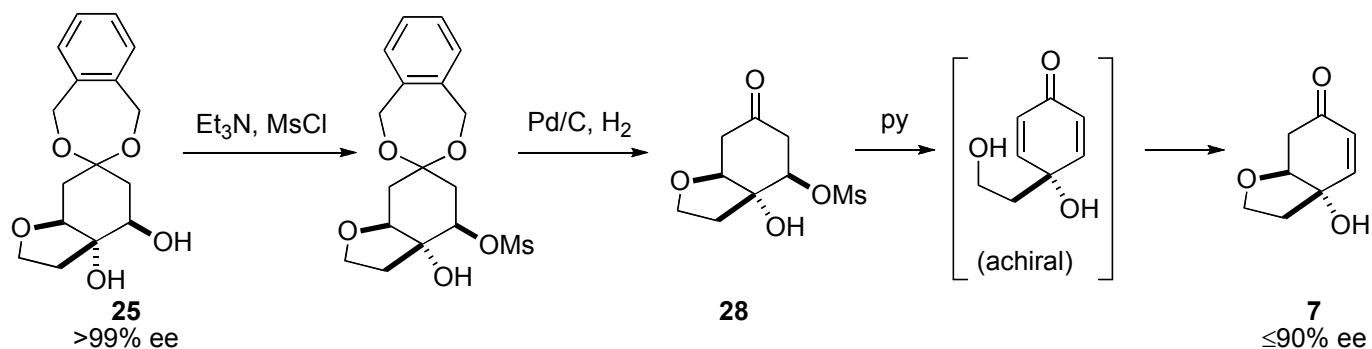

To a solution of diol **25** (17 mg, 0.058 mmol) in  $\text{CH}_2\text{Cl}_2$  (6.8 mL) at 0 °C was added  $\text{Et}_3\text{N}$  (0.09 mL, 0.7 mmol). After 15 min,  $\text{MsCl}$  (0.018 mL, 0.233 mmol) was added to the reaction mixture. Five minutes later, the reaction mixture was diluted with  $\text{CH}_2\text{Cl}_2$ , quenched with aq  $\text{NH}_4\text{Cl}$  (saturated), and extracted with  $\text{CH}_2\text{Cl}_2$  (4x). The organic phase was dried over sodium sulfate and concentrated under reduced pressure. The resulting mono-mesylate was carried forward without purification.

A solution of the above mono-mesylate in  $\text{THF}/\text{MeOH}$  (0.4 mL/0.4 mL) containing 5%  $\text{Pd/C}$  catalyst (10 mg) was stirred under 1 atm of hydrogen at room temperature for 12 h. The reaction mixture was filtered through a pad of Celite, and concentrated under reduced pressure.

A solution of the crude product in  $\text{CH}_2\text{Cl}_2$  (0.6 mL) was added pyridine (0.047 mL, 0.58 mmol). After 18 h of stirring, the reaction mixture was diluted with  $\text{CH}_2\text{Cl}_2$ , washed with  $\text{CuSO}_4$  (aq.), extracted with  $\text{CH}_2\text{Cl}_2$  (4x), washed with water and brine. The organic phase was dried over sodium sulfate and concentrated under reduced pressure. The crude product was purified by flash chromatography (70%  $\text{EtOAc}/\text{hexanes}$ ) to provide cleroindicin F (**7**) as colorless oil (81% yield over 3 steps, 90% ee).  $^1\text{H}$  NMR (500 MHz,  $\text{CDCl}_3$ )  $\delta$  6.77 (d,  $J = 10$  Hz, 1H), 6.04 (d,  $J = 10$  Hz, 1H), 4.25 (t,  $J = 6.0$  Hz, 1H), 4.08 (dd,  $J = 8.5$  Hz,  $J = 15$  Hz, 1H), 3.96 (dd,  $J = 8.5$  Hz,  $J = 15$  Hz, 1H), 3.50 (bs, 1H), 2.80 (dd,  $J = 4.5$  Hz,  $J = 17$  Hz, 1H), 2.63 (dd,  $J = 6$  Hz,  $J = 17$  Hz, 1H), 2.32 (m, 1H), 2.24 (m, 1H);  $^{13}\text{C}$  NMR (125 MHz,  $\text{CDCl}_3$ )  $\delta$  196.7, 147.8, 129.2, 81.9, 76.0, 66.5, 40.5, 39.8; IR (thin film) 3418, 2920, 2851, 1666  $\text{cm}^{-1}$ ; HRMS (ESI) calcd for  $\text{C}_8\text{H}_{10}\text{O}_3$ : 154.0630. Found 154.0625.  $^1\text{H}$  and  $^{13}\text{C}$  NMR, IR, and HRMS data were consistent with that reported in the literature.<sup>1</sup>

### Cleroindicin C (3).

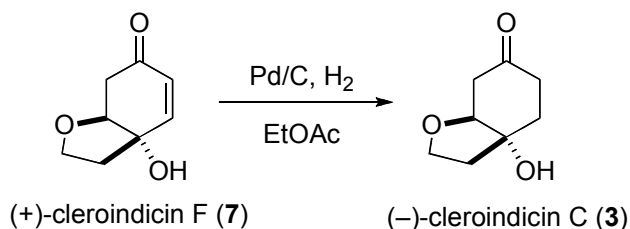

A solution of cleroindicin F (**7**) (20 mg, 0.13 mmol) in  $\text{EtOAc}$  (1 mL) containing 5%  $\text{Pd/C}$  catalyst (50 mg) was stirred under 1 atm of hydrogen at room temperature for 1 hour. The reaction mixture was filtered through a pad of Celite, and concentrated under reduced pressure. The crude product was purified by flash chromatography (75%  $\text{EtOAc}/\text{hexanes}$ ,  $R_f = 0.3$ ) to provide cleroindicin C (**3**) as colorless oil (17 mg, 0.11 mmol, 80 % yield).  $^1\text{H}$  NMR (400 MHz,  $\text{C}_5\text{D}_5\text{N}$ )  $\delta$  4.29 (t,  $J = 4.0$  Hz, 1H), 3.94 (m, 2H), 2.98 (dd,  $J = 4.8$  Hz,  $J = 15.6$  Hz, 1H), 2.80 (dd,  $J = 4.0$  Hz,  $J = 16.0$  Hz, 1H), 2.68 (ddd,  $J = 4.8$  Hz,  $J = 8.4$  Hz,  $J = 16.8$  Hz, 1H), 2.35 (m, 1H), 2.24 (m, 1H), 2.20 (m, 2H), 2.07 (dt,  $J = 8.4$  Hz,  $J = 12.4$  Hz, 1H); IR (thin film) 3305, 2943, 2860, 1705, 1059  $\text{cm}^{-1}$ .  $[\alpha]_D^{25} = -79.0$  (MeOH,  $c = 0.1$ ). HRMS (ESI) calcd for  $\text{C}_8\text{H}_{12}\text{O}_3\text{Na}$ : 179.0684. Found 179.0678.  $^1\text{H}$  and  $^{13}\text{C}$  NMR, IR, and HRMS data were consistent with that reported in the literature.<sup>1</sup>



#### Epi-cleorindicin D (4).

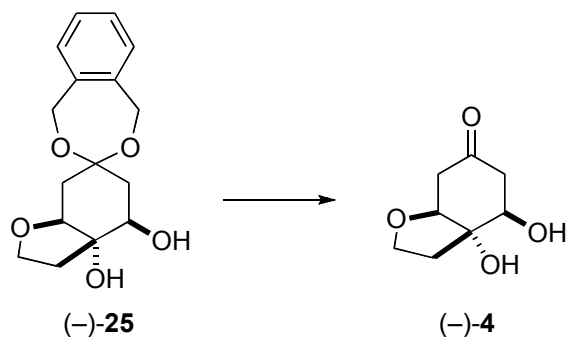

A solution of **25** (29.0 mg, 0.1 mmol) in THF/MeOH (0.5 mL/0.5 mL) containing 5% Pd/C catalyst (10 mg) was stirred under 1 atm of hydrogen at room temperature for 3 h. The reaction mixture was filtered through a pad of Celite, and concentrated under reduced pressure. The crude product was purified by flash chromatography with EtOAc ( $R_f = 0.2$ ) to provide the previously assigned structure for cleroindicin D (**4**) as colorless oil (15.2 mg, 0.09 mmol, 88% yield).  $^1\text{H}$  NMR (400 MHz,  $\text{C}_5\text{D}_5\text{N}$ )  $\delta$  4.74 (dd,  $J = 4.8$  Hz,  $J = 10.8$  Hz, 1H), 4.42 (t,  $J = 4.4$  Hz, 1H), 4.05 (m, 2H), 3.02 (dd,  $J = 4.8$  Hz,  $J = 18$  Hz, 1H), 2.97 (d,  $J = 4.4$  Hz, 2H), 2.80 (m, 1H), 2.79 (dd,  $J = 10.4$  Hz,  $J = 18$  Hz, 1H), 2.27 (ddd,  $J = 2$  Hz,  $J = 5.6$  Hz,  $J = 13.2$  Hz, 1H);  $^{13}\text{C}$  NMR (125 MHz,  $\text{CDCl}_3$ )  $\delta$  206.9, 82.9, 82.6, 72.1, 66.5, 43.1, 42.9, 35.8; IR (thin film) 3387, 2955, 2924, 2854, 1724  $\text{cm}^{-1}$ ; HRMS (ESI) calcd for  $\text{C}_8\text{H}_{12}\text{O}_4\text{Na}$ : 195.0633. Found 195.0630.  $[\alpha]_{\text{D}}^{25} = -35.5$  ( $\text{CHCl}_3$ ,  $c = 0.4$ ).

#### Cleorindicin D (5).

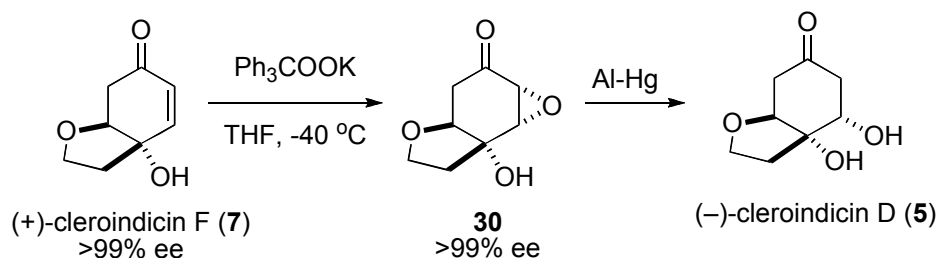

To a suspension of KH (8.2 mg, 0.20 mmol) in THF (0.4 mL) at  $-78$  °C was added  $\text{Ph}_3\text{COOH}$  (113 mg, 0.41 mmol). After 10 min, enone **7** (13.2 mg, 0.086 mmol) in THF (0.86 mL) was added to the  $\text{Ph}_3\text{COOK}$  solution. The reaction mixture was then warmed up to  $-40$  °C. Once the starting material was consumed (about 40 min), the reaction mixture was diluted with  $\text{CH}_2\text{Cl}_2$ , quenched with  $\text{Na}_2\text{SO}_3$  (sat.), and extracted with  $\text{CH}_2\text{Cl}_2$  (4x). The organic phase was dried over sodium sulfate and concentrated under reduced pressure. The crude product was purified by flash chromatography with EtOAc to provide epoxide **30**. The spectroscopic data matched that reported in the literature.<sup>ii</sup>  $^1\text{H}$  NMR (400 MHz,  $\text{CDCl}_3$ )  $\delta$  3.93 (m, 3H), 3.64 (dd,  $J = 2.4$  Hz,  $J = 4.4$  Hz, 1H), 3.46 (dd,  $J = 0.8$  Hz,  $J = 4.4$  Hz, 1H), 3.06 (dd,  $J = 4.0$  Hz,  $J = 14.8$  Hz, 1H), 2.67 (bs, 1H), 2.40 (dd,  $J = 3.2$  Hz,  $J = 14.8$  Hz, 1H), 2.28 (ddd,  $J = 4.4$  Hz,  $J = 7.6$  Hz,  $J = 13.2$  Hz, 1H), 2.17 (dt,  $J = 8.4$  Hz,  $J = 13.6$  Hz, 1H).

To a solution of the above epoxide **30** (22 mg, 0.13 mmol) in a mixture of THF (5.2 mL), EtOH (2.6 mL),  $\text{H}_2\text{O}$  (2.6 mL) and saturated aqueous  $\text{NaHCO}_3$  (0.5 mL) at 0 °C, aluminum amalgam (freshly prepared from 0.500 g of aluminum foil) was added. The reaction mixture was vigorously stirred at 0 °C for 40 min, then

filtered through Celite. The filtrate was diluted with EtOAc, washed with brine and the aqueous phase was extracted with EtOAc. The combined organic phases were dried over sodium sulfate and concentrated under reduced pressure. The crude product was purified by flash chromatography (EtOAc,  $R_f = 0.2$ ) to provide cleroindicin D (**5**) as colorless oil (6.0 mg, 0.035 mmol, 40% yield over 2 steps).  $^1\text{H}$  NMR (400 MHz,  $\text{C}_5\text{D}_5\text{N}$ )  $\delta$  4.36 (m, 1H), 4.35 (t,  $J = 4.4$  Hz, 1H), 4.00 (m, 2H), 3.24 (dd,  $J = 4.8$  Hz,  $J = 16.8$  Hz, 1H), 3.02 (dd,  $J = 6.8$  Hz,  $J = 16.8$  Hz, 1H), 2.85 (dd,  $J = 3.2$  Hz,  $J = 15.6$  Hz, 1H), 2.81 (dd,  $J = 3.6$  Hz,  $J = 15.6$  Hz, 1H), 2.28 (m, 2H); HRMS (ESI) calcd for  $\text{C}_8\text{H}_{12}\text{O}_4\text{Na}$ : 195.0633. Found 195.0637.  $[\alpha]_{\text{D}}^{25} = -38.0$  (MeOH,  $c = 0.5$ ).  $^1\text{H}$  and  $^{13}\text{C}$  NMR, IR, and HRMS data were consistent with that reported in the literature.<sup>ib, ii</sup>

### Cleroindicin E (**6**).

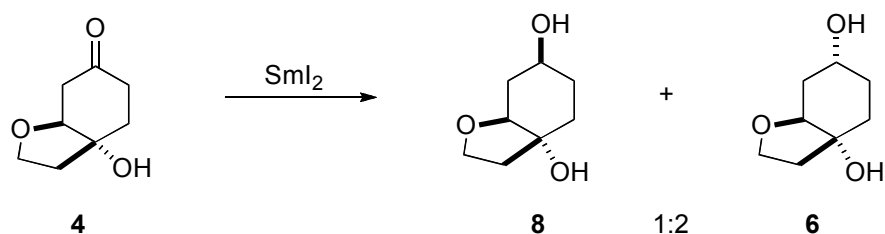

To a solution of cleroindicin C (**3**) (6 mg, 0.038 mmol) in THF/ $\text{H}_2\text{O}$  (0.5 mL/0.1 mL) at 0 °C was added  $\text{SmI}_2$  (0.1M in THF, 0.76 ml, 0.076 mmol), and the mixture was stirred at this same temperature for 10 min. The reaction mixture was quenched with  $\text{NaHCO}_3(\text{sat.})$ , and extracted with  $\text{CH}_2\text{Cl}_2$ . The combined organics were washed with brine, dried with  $\text{Na}_2\text{SO}_4$ , and concentrated to afford an inseparable mixture of isocleroindicin E (**8**) and cleroindicin E (**6**) (1:2) (5 mg, 0.032 mmol, 85% yield) which was spectroscopically identical to that reported in the literature.<sup>i</sup>  $\text{C}_8\text{H}_{14}\text{O}_3\text{Na}$ : 181.0841. Found 181.0835.

### Isocleroindicin E (**8**).

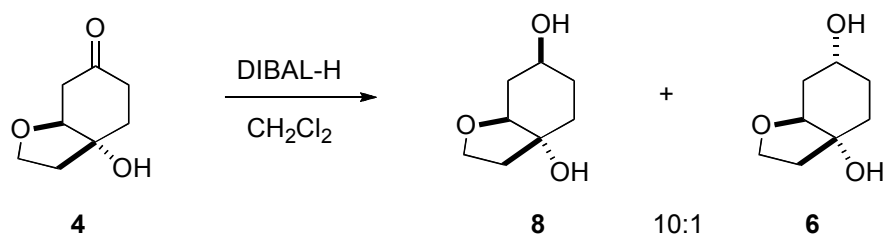

To a solution of cleroindicin C (**3**) (10 mg, 0.064 mmol) in  $\text{CH}_2\text{Cl}_2$  (0.7 mL) at  $-78$  °C was added DIBAL-H (1M in hexanes, 0.07 ml, 0.07 mmol), and the mixture was stirred at this same temperature for 1 h. The reaction mixture was quenched with 1M Rochelle's salt, diluted with  $\text{CH}_2\text{Cl}_2$ , quickly warmed to room temperature and stirred vigorously for 45 minutes. The aqueous layer was extracted with  $\text{CH}_2\text{Cl}_2$ . The combined organics were washed with brine, dried with  $\text{Na}_2\text{SO}_4$ , and concentrated. The crude product was purified by flash chromatography (10% MeOH/EtOAc,  $R_f = 0.3$ ) to provide isocleroindicin E (**8**) as colorless oil (8.5 mg, 0.054 mmol, 84 % yield).  $^1\text{H}$  NMR (400 MHz,  $\text{C}_5\text{D}_5\text{N}$ )  $\delta$  4.26 (dd,  $J = 8.0$  Hz,  $J = 16.4$  Hz, 1H), 4.22 (dd,  $J = 5.6$  Hz,  $J = 9.2$  Hz, 1H), 4.08 (m, 1H), 4.02 (m, 1H), 2.45 (m, 1H), 2.30 (ddd,  $J = 4.0$  Hz,  $J = 8.4$  Hz,  $J = 14.4$  Hz, 1H), 2.20 (m, 1H), 2.15 (m, 1H), 2.02 (m, 1H), 1.98 (m, 1H), 1.83 (m, 1H), 1.74 (m, 1H). HRMS (ESI) calcd for  $\text{C}_8\text{H}_{14}\text{O}_3\text{Na}$ : 181.0841. Found 181.0835.  $[\alpha]_{\text{D}}^{25} = -22.0$  (MeOH,  $c = 0.4$ ).  $^1\text{H}$  NMR and HRMS data were consistent with that reported in the literature.<sup>ib</sup> Our rotation is slightly less than that reported by Hase ( $[\alpha]_{\text{D}}^{25} = -23.0$ ),<sup>1b</sup> most likely because of the small amount of inseparable **6** present in our sample.

### III. Revised Biosynthetic Pathway

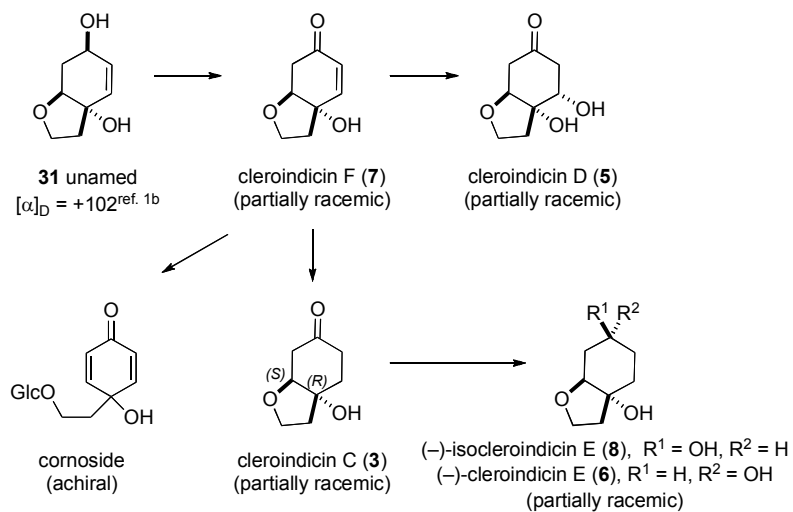

We have found that cleroindicins **3**, **5–7**, are at least partially racemic in nature. However the unnamed cleroindicin **31**, isolated by Hase, appears to be unracemized because their hydrogenation of **31** to isocleroindicin **E (8)** resulted in a more optically active material ( $[\alpha]_D^{25} = -23.0$ ) than the natural isocleroindicin **E (8)** ( $[\alpha]_D^{25} = -6.00$ ).<sup>ib</sup> Therefore, it appears that **31** is the biosynthetic precursor to chiral cleroindicins, as well as achiral cornoside.

#### IV. Scanned HPLC traces, NMR, and IR spectra

HPLC data for racemic **25**:

### HPLC Report

SH13-11\_15%IPA\_1ml-min-OD-H-02  
 Acquired: 10/15/2008 5:41:27 PM  
 Method Name: C:\EZStart\Projects\Default\Methods\untitled.met  
 Data: C:\Shuang\SH13-11\_15%IPA\_1ml-min-OD-H-02214.dat

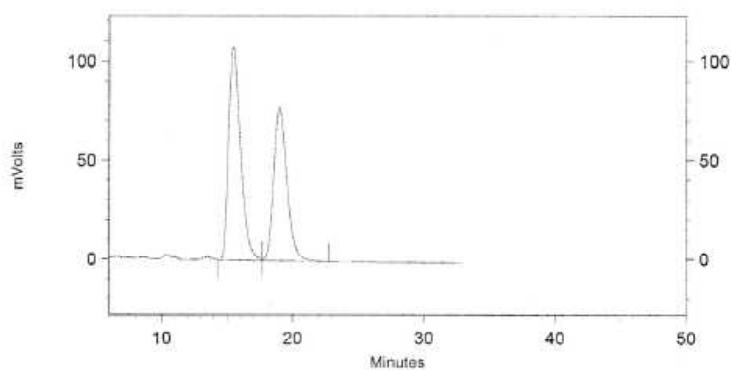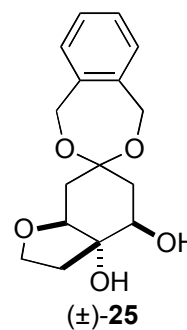

SPD-10Avp

Ch1-220nm

Results

| Pk #   | Name | Retention Time | Area     | Area Percent | Height | Height Percent |
|--------|------|----------------|----------|--------------|--------|----------------|
| 1      |      | 15.473         | 6788904  | 55.314       | 107819 | 58.227         |
| 2      |      | 18.997         | 5484508  | 44.686       | 77351  | 41.773         |
| Totals |      |                | 12273412 | 100.000      | 185170 | 100.000        |

HPLC data for enantioenriched **25**:

## HPLC Report

SH13-11\_15%IPA\_1ml-min-OD-H-04-enantio

Acquired: 10/15/2008 10:43:32 PM

Method Name: C:\EZStart\Projects\Default\Methods\untitled.met

Data: C:\Shuang\SH13-11\_15%IPA\_1ml-min-OD-H-04-enantio218.dat

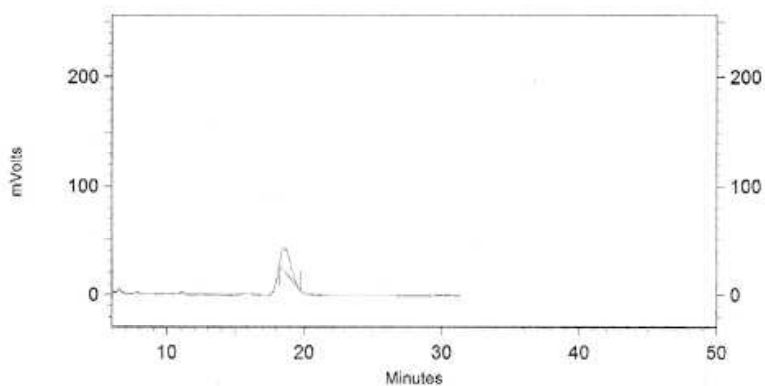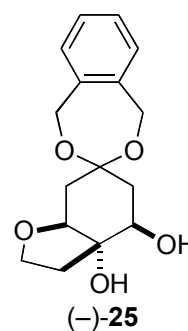

SPD-10Avp

Ch1-220nm

Results

| Pk #   | Name | Retention Time | Area   | Area Percent | Height | Height Percent |
|--------|------|----------------|--------|--------------|--------|----------------|
| 1      |      | 18.567         | 978474 | 100.000      | 21490  | 100.000        |
| Totals |      |                | 978474 | 100.000      | 21490  | 100.000        |

HPLC data for racemic clerindicin F (7):

## HPLC Report

SH7-enone-12-enone-5IPA-Hex-AD-H

Acquired: 8/5/2008 5:00:46 PM

Method Name: C:\EZStart\Projects\Default\Methods\untitled.met

Data: C:\Shuang\SH7-enone-12-enone-5IPA-Hex-AD-H133.dat

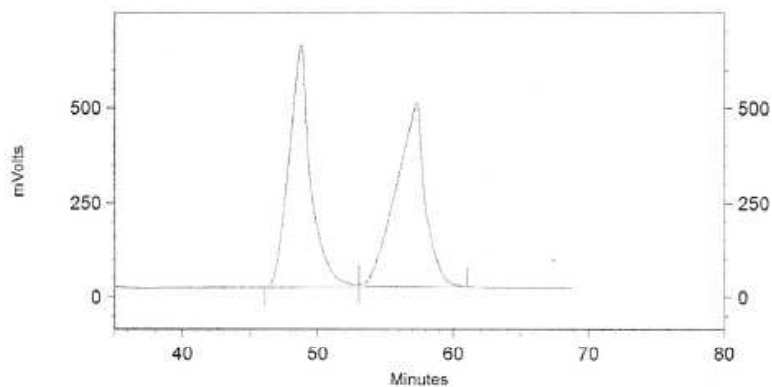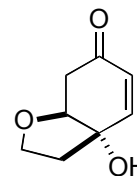

(±)-clerindicin F (7)

SPD-10Avp

Ch1-210nm

Results

| Pk #   | Name | Retention Time | Area      | Area Percent | Height  | Height Percent |
|--------|------|----------------|-----------|--------------|---------|----------------|
| 1      |      | 48.783         | 71681283  | 49.516       | 639420  | 56.752         |
| 2      |      | 57.305         | 73081867  | 50.484       | 487272  | 43.248         |
| Totals |      |                | 144763150 | 100.000      | 1126692 | 100.000        |

HPLC data for enantioenriched (+)-cleroindicin F (7):

## HPLC Report

SH13-27-enone02\_4%IPA\_1mL\_AD-H  
Acquired: 10/31/2008 1:33:19 AM  
Method Name: C:\EZStart\Projects\Default\Methods\untitled.met  
Data: C:\Shuang\SH13-27-enone02\_4%IPA\_1mL\_AD-H230.dat

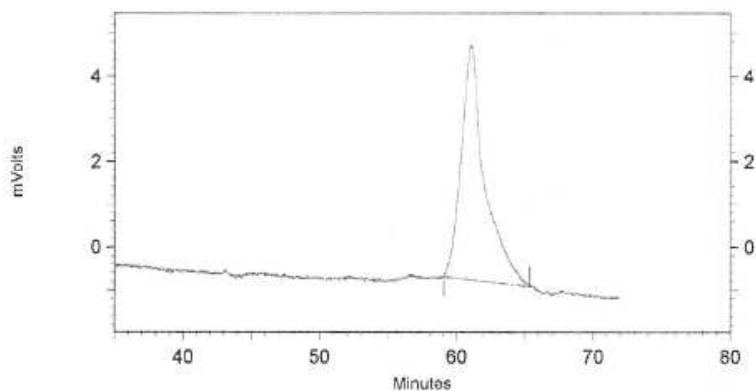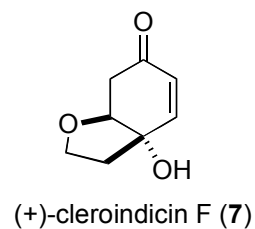

SPD-10Avp

Ch1-210nm

Results

| Pk #   | Name | Retention Time | Area   | Area Percent | Height | Height Percent |
|--------|------|----------------|--------|--------------|--------|----------------|
| 1      |      | 61.047         | 651441 | 100.000      | 5490   | 100.000        |
| Totals |      |                | 651441 | 100.000      | 5490   | 100.000        |

HPLC data for racemic epoxide **30**:

## HPLC Report

SH7-expoxide-racemic-10%IPA\_1mL\_AD-H

Acquired: 11/13/2008 11:52:39 AM

Method Name: C:\EZStart\Projects\Default\Methods\untitled.met

Data: C:\Shuang\SH7-expoxide-racemic-10%IPA\_1mL\_AD-H232.dat

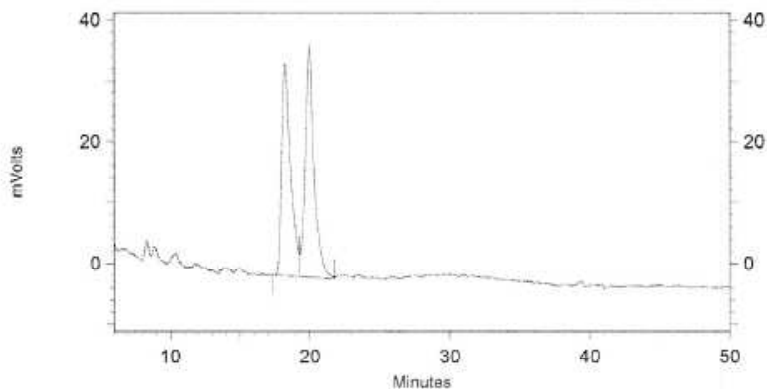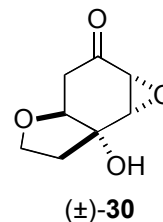

SPD-10Avp

Ch1-210nm

Results

| Pk #   | Name | Retention Time | Area    | Area Percent | Height | Height Percent |
|--------|------|----------------|---------|--------------|--------|----------------|
| 1      |      | 18.223         | 1559009 | 48.514       | 34936  | 47.771         |
| 2      |      | 19.967         | 1654540 | 51.486       | 38196  | 52.229         |
| Totals |      |                | 3213549 | 100.000      | 73132  | 100.000        |



HPLC data for enantioenriched epoxide **30**:

## HPLC Report

SH13-47-expoxide-enantiopure-10%IPA\_1mL\_AD-H

Acquired: 11/13/2008 1:05:05 PM

Method Name: C:\EZStart\Projects\Default\Methods\untitled.met

Data: C:\Shuang\SH13-47-expoxide-enantiopure-10%IPA\_1mL\_AD-H233.dat

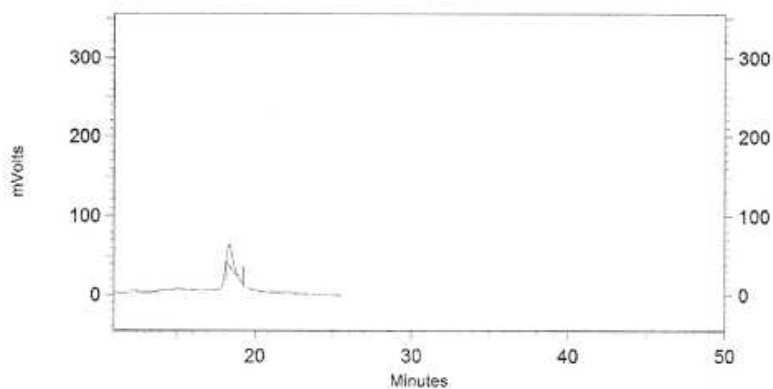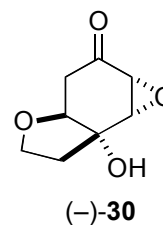

SPD-10Avp

Ch1-210nm

Results

| Pk #   | Name | Retention Time | Area   | Area Percent | Height | Height Percent |
|--------|------|----------------|--------|--------------|--------|----------------|
| 1      |      | 18.380         | 643383 | 100.000      | 26197  | 100.000        |
| Totals |      |                | 643383 | 100.000      | 26197  | 100.000        |

Compound 11:

| INDEX | FREQUENCY | PPM    | HEIGHT |
|-------|-----------|--------|--------|
| 1     | 3667.957  | 9.179  | 18.4   |
| 2     | 2987.627  | 7.270  | 2.9    |
| 3     | 2881.522  | 7.405  | 7.7    |
| 4     | 2793.364  | 6.984  | 6.0    |
| 5     | 2684.822  | 6.713  | 9.6    |
| 6     | 2676.684  | 6.993  | 8.5    |
| 7     | 1885.119  | 3.713  | 7.6    |
| 8     | 1489.052  | 3.761  | 11.2   |
| 9     | 1474.031  | 3.688  | 8.3    |
| 10    | 1441.971  | 3.605  | 8.8    |
| 11    | 1433.525  | 3.584  | 8.2    |
| 12    | 1431.375  | 3.579  | 6.3    |
| 13    | 1424.619  | 3.562  | 9.1    |
| 14    | 1171.412  | 2.929  | 7.4    |
| 15    | 1165.344  | 2.916  | 10.6   |
| 16    | 1161.277  | 2.984  | 7.2    |
| 17    | 654.248   | 1.988  | 3.4    |
| 18    | 647.031   | 1.618  | 5.4    |
| 19    | 628.684   | 1.972  | 148.3  |
| 20    | 613.883   | 1.585  | 4.3    |
| 21    | 604.650   | 1.512  | 3.1    |
| 22    | 597.894   | 1.485  | 2.7    |
| 23    | 506.223   | 1.266  | 2.6    |
| 24    | 419.927   | 1.050  | 8.7    |
| 25    | 417.316   | 1.043  | 3.8    |
| 26    | 411.828   | 1.028  | 7.7    |
| 27    | 402.575   | 1.047  | 8.3    |
| 28    | 354.053   | 0.885  | 3.3    |
| 29    | 35.739    | 0.009  | 2.7    |
| 30    | 33.436    | 0.084  | 3.1    |
| 31    | 33.518    | 0.078  | 2.7    |
| 32    | 27.601    | 0.069  | 3.3    |
| 33    | 29.998    | 0.053  | 5.9    |
| 34    | 18.734    | 0.046  | 5.6    |
| 35    | 11.017    | 0.028  | 151.1  |
| 36    | 7.946     | 0.020  | 151.2  |
| 37    | -8.484    | -0.021 | 3.2    |
| 38    | -16.808   | -0.040 | 2.8    |

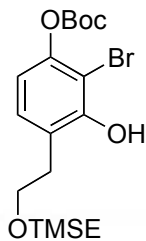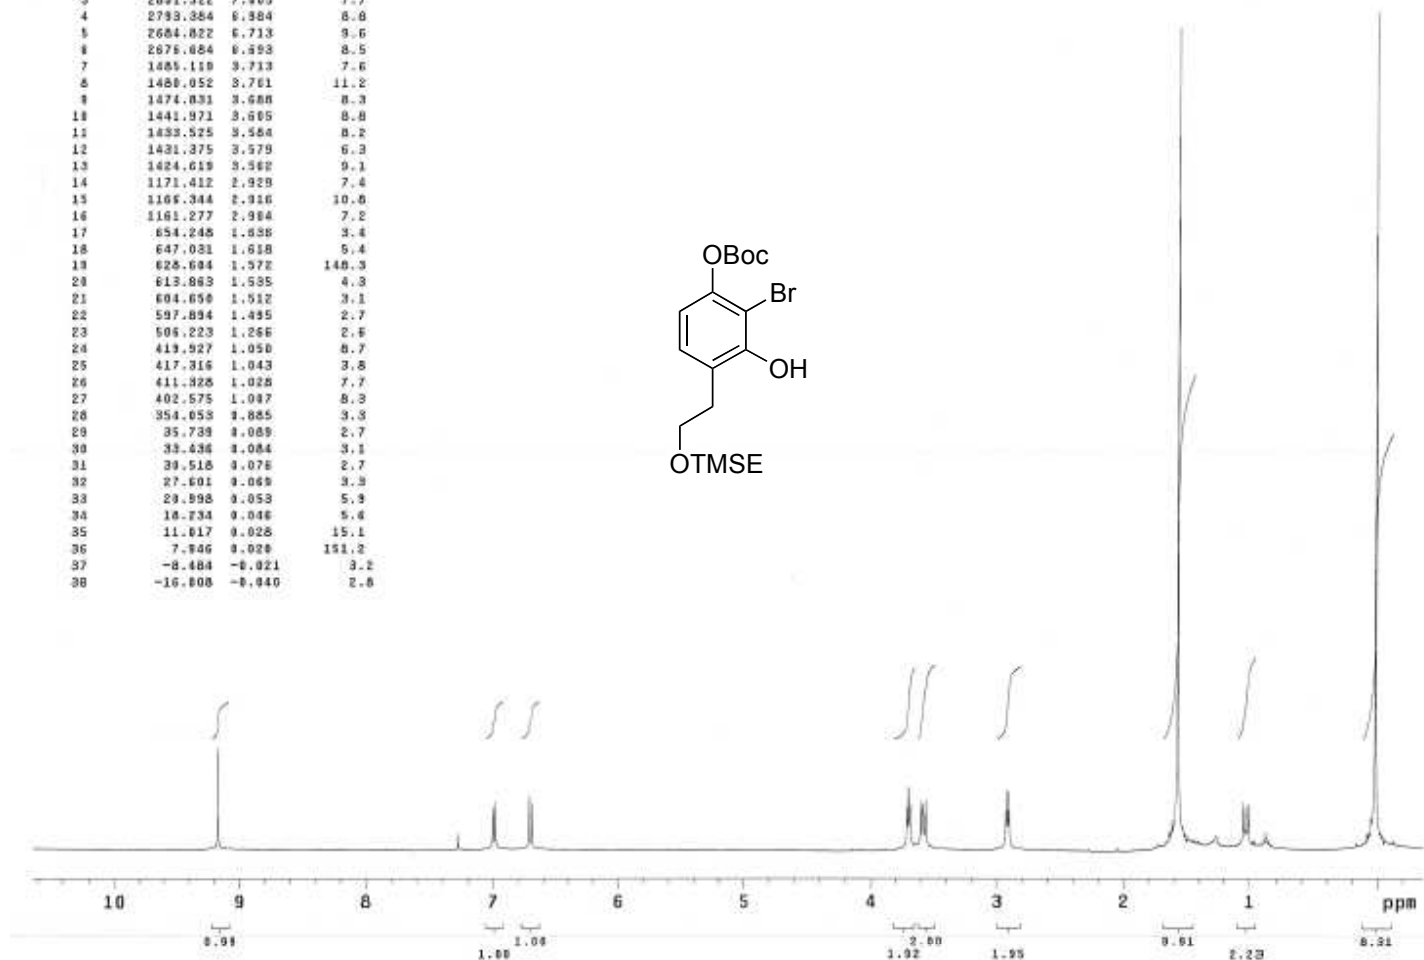

| INDEX | FREQUENCY | PPM     | HEIGHT |
|-------|-----------|---------|--------|
| 1     | 15515.451 | 154.260 | 24.8   |
| 2     | 15212.555 | 151.265 | 11.9   |
| 3     | 14928.733 | 148.445 | 17.2   |
| 4     | 13252.627 | 129.793 | 46.2   |
| 5     | 12569.874 | 126.366 | 25.1   |
| 6     | 11991.586 | 118.260 | 87.0   |
| 7     | 10731.875 | 106.722 | 11.9   |
| 8     | 8155.889  | 80.311  | 32.2   |
| 9     | 7798.846  | 77.549  | 75.5   |
| 10    | 7762.881  | 77.230  | 75.1   |
| 11    | 7734.757  | 76.911  | 74.1   |
| 12    | 7190.765  | 71.582  | 40.8   |
| 13    | 6871.794  | 69.325  | 39.1   |
| 14    | 3381.292  | 33.622  | 42.7   |
| 15    | 2798.388  | 27.824  | 162.0  |
| 16    | 1848.870  | 18.305  | 38.8   |
| 17    | -134.441  | -1.337  | 100.6  |

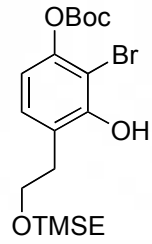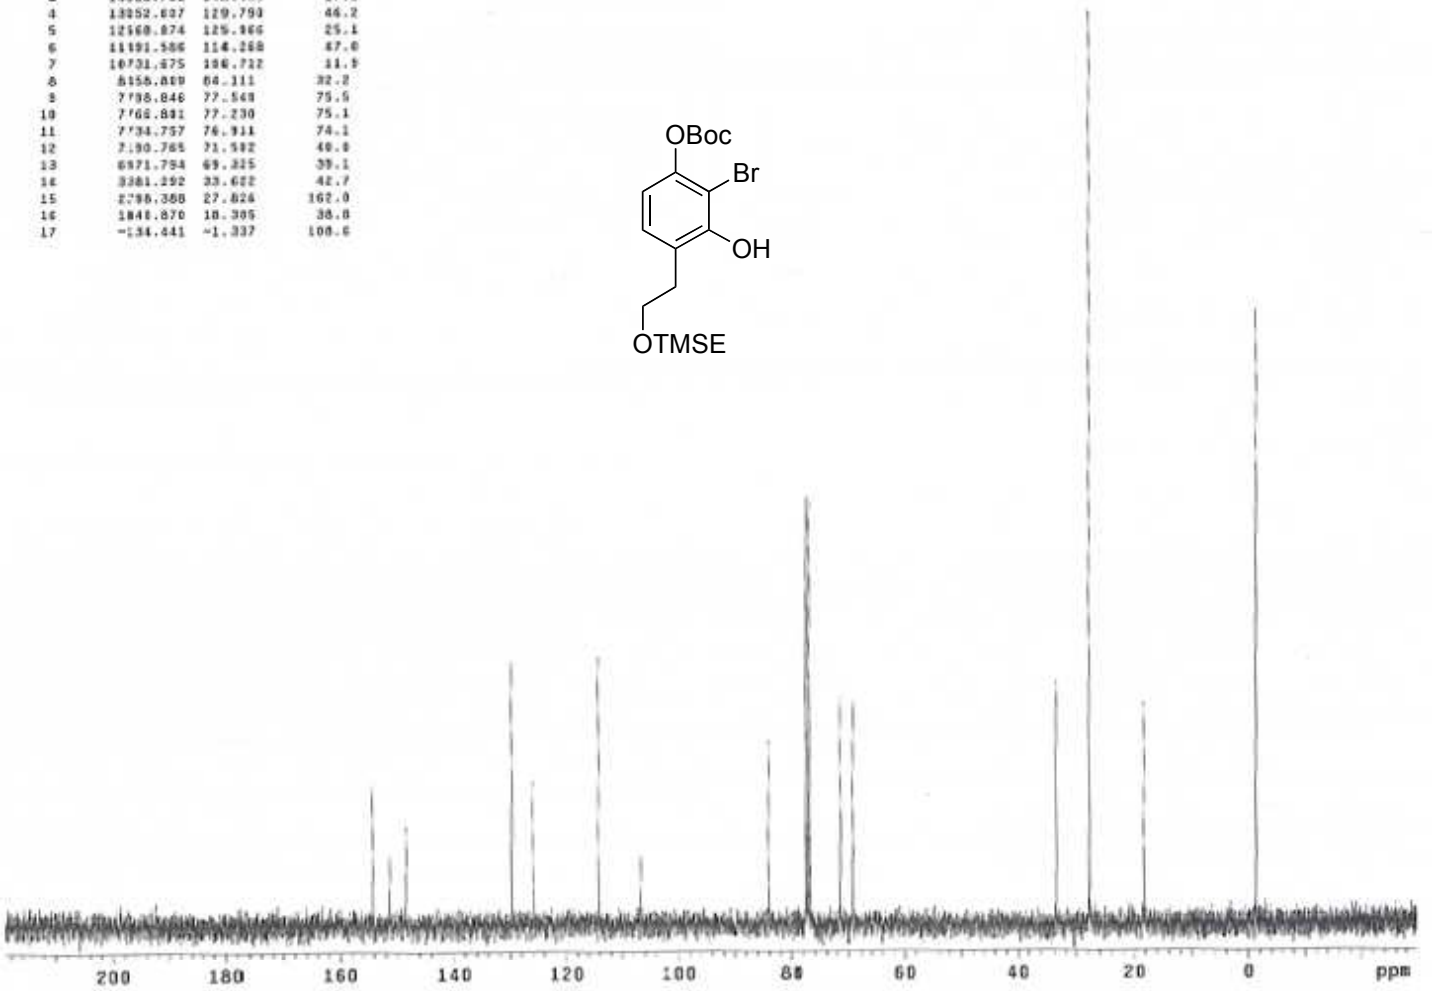

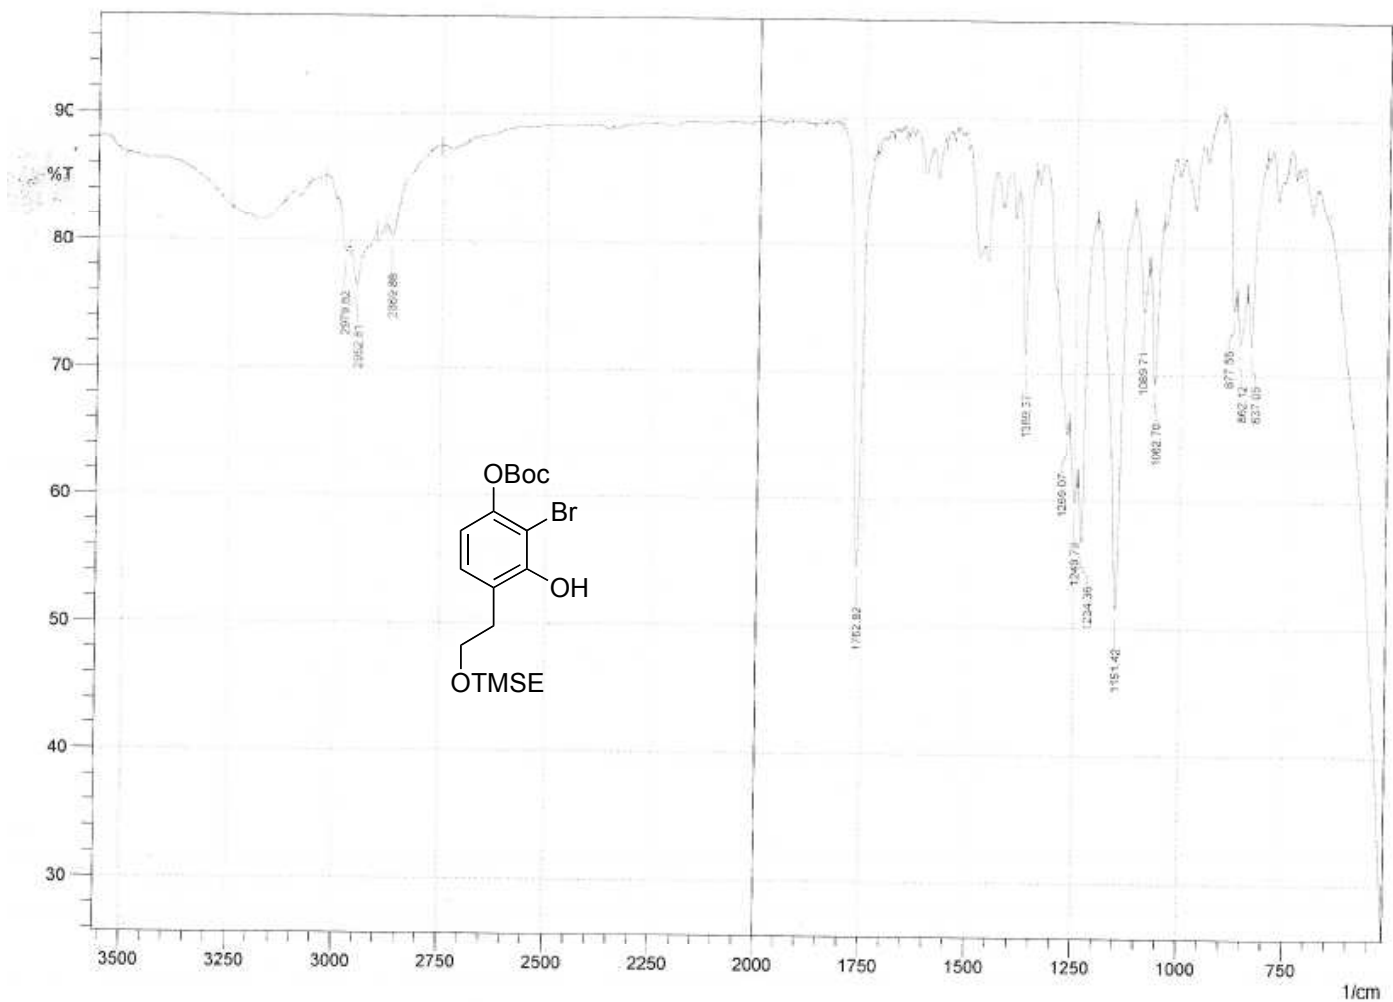

Compound 13:

| INDEX | FREQUENCY | PPM   | HEIGHT | INDEX | FREQUENCY | PPM    | HEIGHT |
|-------|-----------|-------|--------|-------|-----------|--------|--------|
| 1     | 2908.855  | 7.273 | 8.4    | 40    | 3.186     | 0.008  | 2.0    |
| 2     | 2900.717  | 7.253 | 7.8    | 41    | -2.803    | -0.007 | 13.8   |
| 3     | 2773.576  | 6.935 | 8.6    | 42    | -6.027    | -0.015 | 151.2  |
| 4     | 2765.284  | 6.914 | 7.6    | 43    | -9.252    | -0.023 | 4.9    |
| 5     | 2129.731  | 5.325 | 1.7    |       |           |        |        |
| 6     | 2123.435  | 5.309 | 1.7    |       |           |        |        |
| 7     | 1439.053  | 3.598 | 5.8    |       |           |        |        |
| 8     | 1432.297  | 3.581 | 13.3   |       |           |        |        |
| 9     | 1425.540  | 3.564 | 6.7    |       |           |        |        |
| 10    | 1408.957  | 3.523 | 16.8   |       |           |        |        |
| 11    | 1404.811  | 3.512 | 10.0   |       |           |        |        |
| 12    | 1402.201  | 3.506 | 2.6    |       |           |        |        |
| 13    | 1396.366  | 3.491 | 7.6    |       |           |        |        |
| 14    | 1390.838  | 3.478 | 1.9    |       |           |        |        |
| 15    | 1388.227  | 3.471 | 7.8    |       |           |        |        |
| 16    | 1269.378  | 3.174 | 29.2   |       |           |        |        |
| 17    | 1247.727  | 3.120 | 1.9    |       |           |        |        |
| 18    | 1240.510  | 3.102 | 2.2    |       |           |        |        |
| 19    | 1233.600  | 3.084 | 2.9    |       |           |        |        |
| 20    | 1226.997  | 3.068 | 1.3    |       |           |        |        |
| 21    | 1193.677  | 2.985 | 1.7    |       |           |        |        |
| 22    | 1186.920  | 2.968 | 3.3    |       |           |        |        |
| 23    | 1180.010  | 2.950 | 2.4    |       |           |        |        |
| 24    | 1172.793  | 2.932 | 2.2    |       |           |        |        |
| 25    | 753.442   | 1.884 | 3.6    |       |           |        |        |
| 26    | 634.593   | 1.587 | 1.3    |       |           |        |        |
| 27    | 620.312   | 1.551 | 135.7  |       |           |        |        |
| 28    | 616.627   | 1.542 | 23.3   |       |           |        |        |
| 29    | 612.942   | 1.533 | 5.4    |       |           |        |        |
| 30    | 610.024   | 1.525 | 20.5   |       |           |        |        |
| 31    | 371.558   | 0.929 | 7.2    |       |           |        |        |
| 32    | 368.947   | 0.922 | 1.6    |       |           |        |        |
| 33    | 363.112   | 0.908 | 6.4    |       |           |        |        |
| 34    | 357.738   | 0.894 | 1.7    |       |           |        |        |
| 35    | 354.974   | 0.888 | 6.6    |       |           |        |        |
| 36    | 18.541    | 0.046 | 1.4    |       |           |        |        |
| 37    | 17.773    | 0.044 | 1.6    |       |           |        |        |
| 38    | 16.699    | 0.042 | 2.8    |       |           |        |        |
| 39    | 5.182     | 0.013 | 1.2    |       |           |        |        |

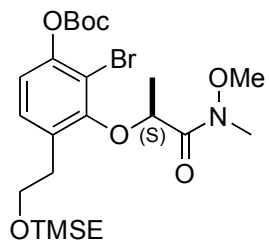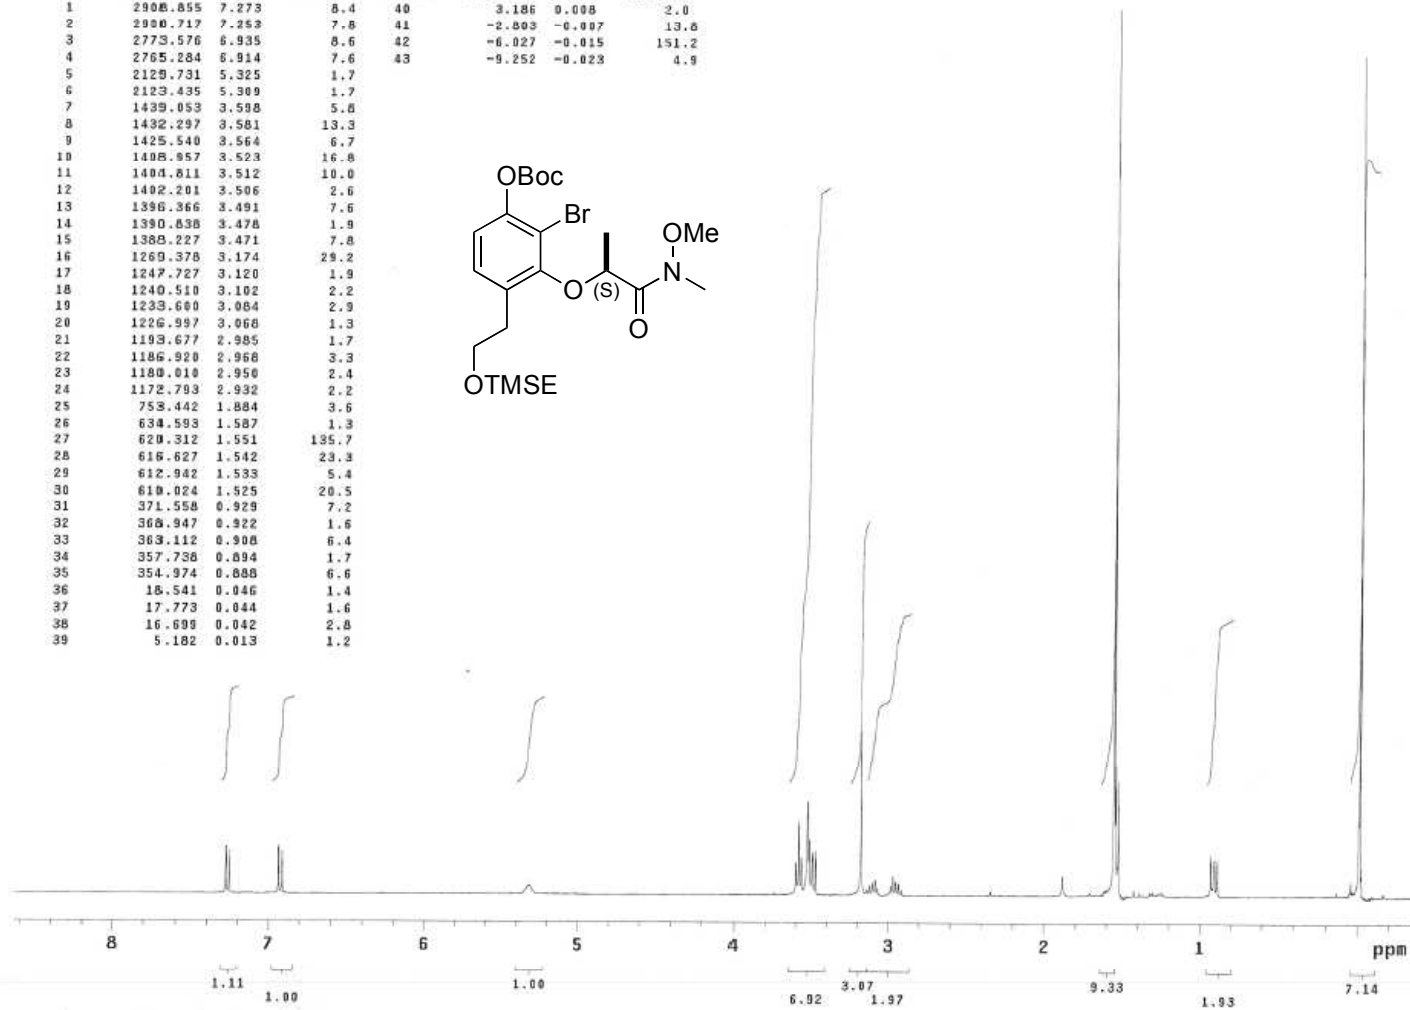

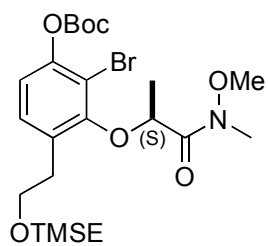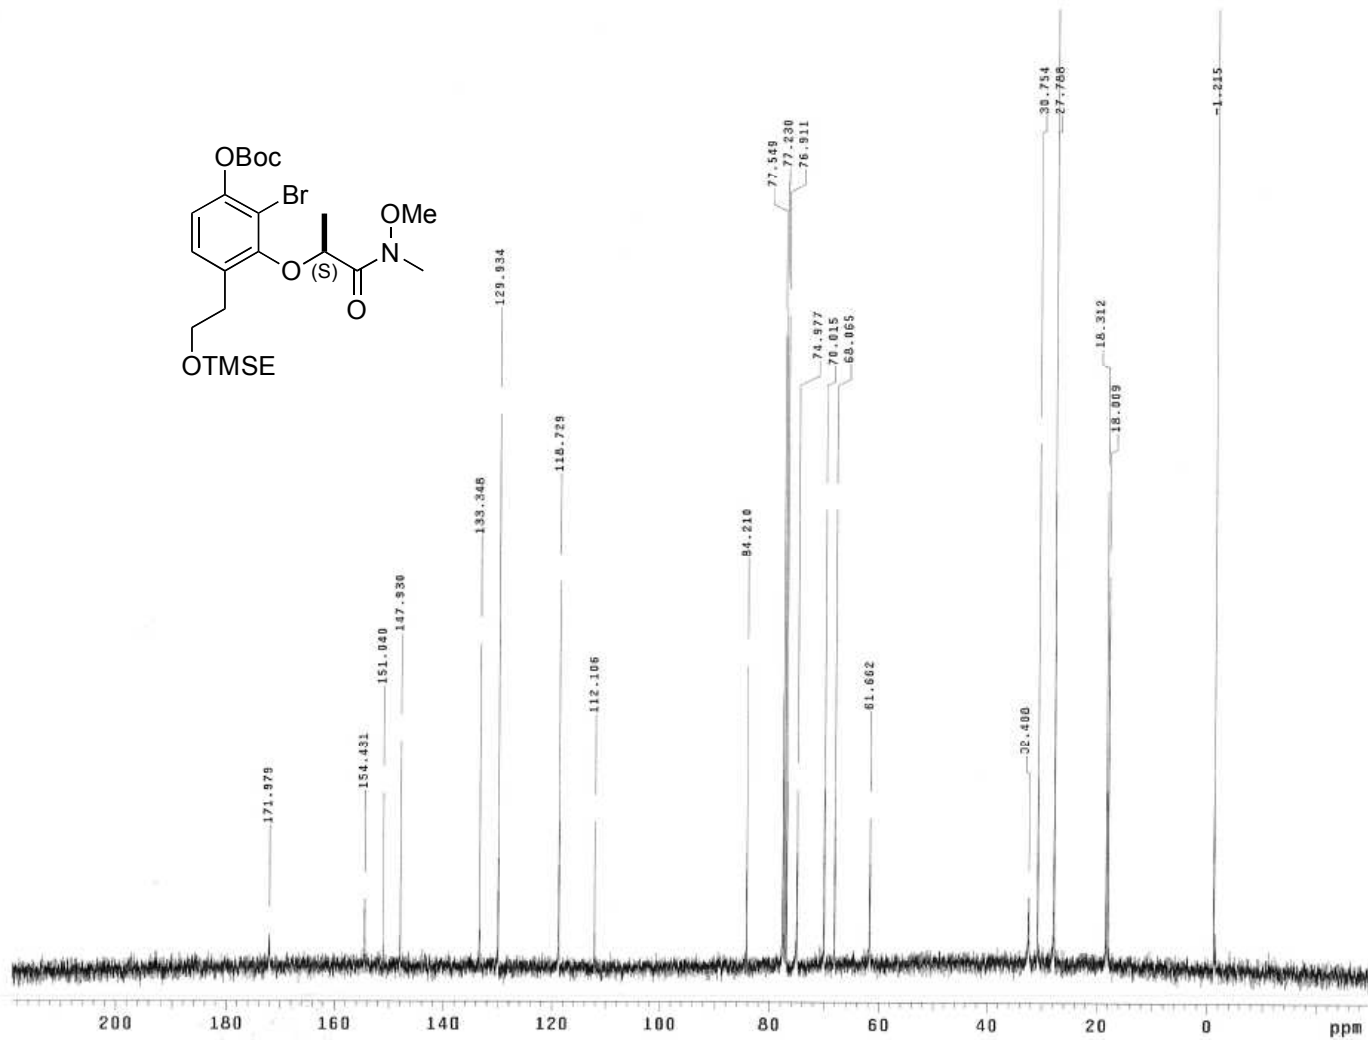

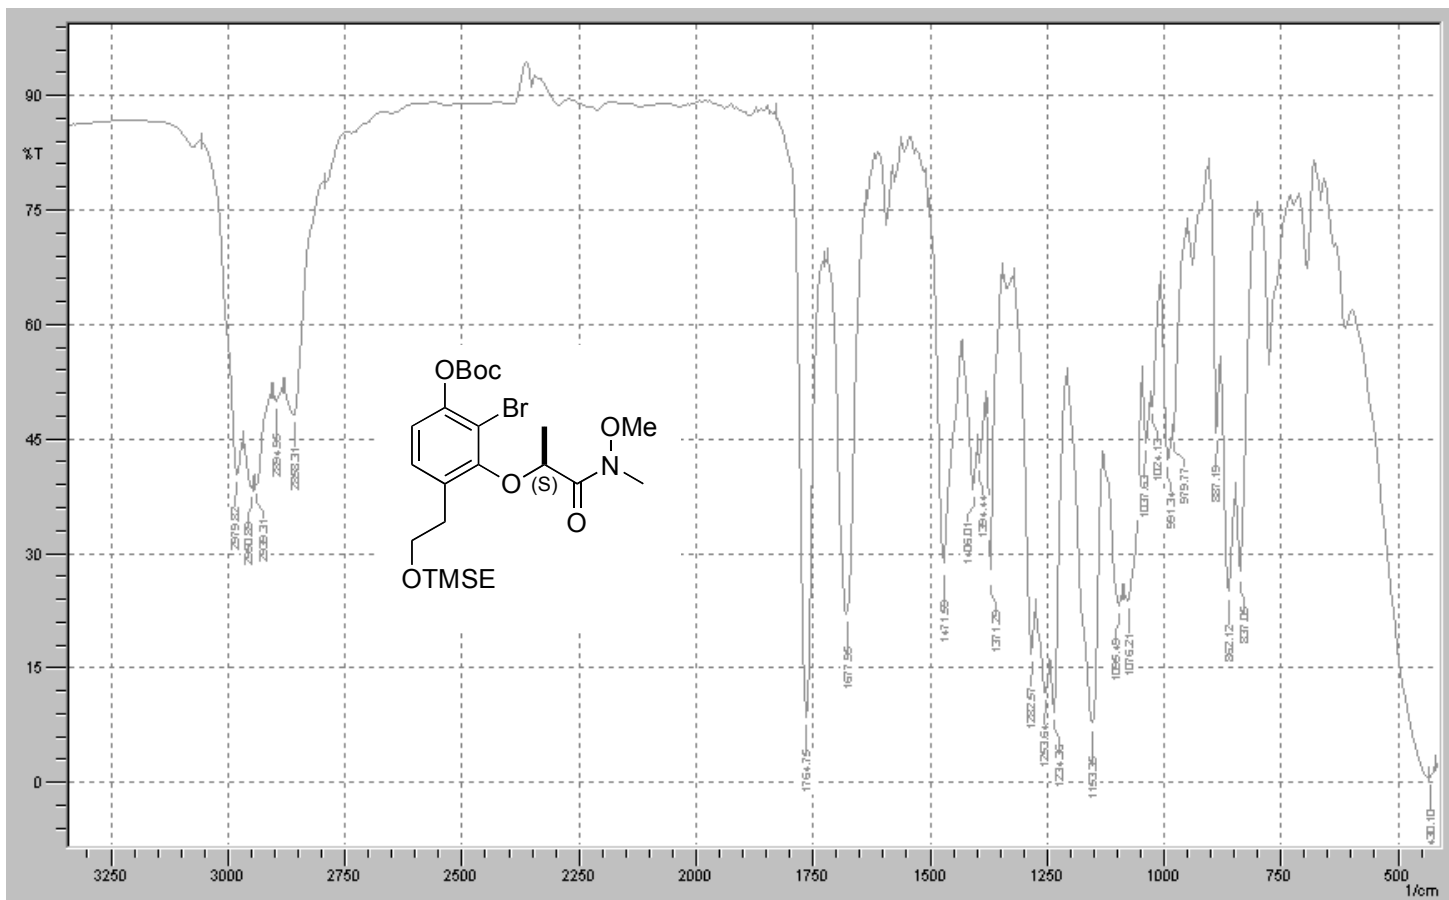

Compound 14:

| INDEX | FREQUENCY | PPM    | HEIGHT | INDEX | FREQUENCY | PPM    | HEIGHT |
|-------|-----------|--------|--------|-------|-----------|--------|--------|
| 1     | 2997.627  | 7.270  | 3.7    | 40    | -22.457   | -0.056 | 4.9    |
| 2     | 2839.697  | 7.078  | 19.9   | 41    | -24.607   | -0.062 | 3.2    |
| 3     | 2822.252  | 7.057  | 21.1   | 42    | -68.845   | -0.152 | 2.9    |
| 4     | 2692.807  | 6.733  | 24.3   |       |           |        |        |
| 5     | 2684.362  | 6.712  | 21.0   |       |           |        |        |
| 6     | 2625.551  | 6.565  | 9.4    |       |           |        |        |
| 7     | 2079.059  | 5.198  | 6.9    |       |           |        |        |
| 8     | 2072.917  | 5.183  | 6.5    |       |           |        |        |
| 9     | 1430.301  | 3.576  | 18.9   |       |           |        |        |
| 10    | 1419.859  | 3.550  | 64.9   |       |           |        |        |
| 11    | 1412.028  | 3.531  | 15.2   |       |           |        |        |
| 12    | 1404.197  | 3.511  | 24.0   |       |           |        |        |
| 13    | 1396.826  | 3.493  | 24.9   |       |           |        |        |
| 14    | 1387.613  | 3.469  | 21.4   |       |           |        |        |
| 15    | 1276.902  | 3.193  | 67.2   |       |           |        |        |
| 16    | 1196.441  | 2.991  | 3.6    |       |           |        |        |
| 17    | 1189.684  | 2.975  | 5.6    |       |           |        |        |
| 18    | 1182.467  | 2.957  | 10.0   |       |           |        |        |
| 19    | 1175.557  | 2.939  | 13.9   |       |           |        |        |
| 20    | 1171.872  | 2.930  | 10.0   |       |           |        |        |
| 21    | 1168.494  | 2.922  | 9.6    |       |           |        |        |
| 22    | 1164.962  | 2.913  | 12.6   |       |           |        |        |
| 23    | 1157.899  | 2.895  | 7.9    |       |           |        |        |
| 24    | 1150.836  | 2.877  | 4.2    |       |           |        |        |
| 25    | 1025.998  | 2.565  | 3.0    |       |           |        |        |
| 26    | 606.646   | 1.517  | 58.8   |       |           |        |        |
| 27    | 600.197   | 1.501  | 54.7   |       |           |        |        |
| 28    | 500.388   | 1.251  | 3.3    |       |           |        |        |
| 29    | 494.553   | 1.237  | 3.7    |       |           |        |        |
| 30    | 369.869   | 0.925  | 21.4   |       |           |        |        |
| 31    | 366.951   | 0.917  | 8.2    |       |           |        |        |
| 32    | 361.731   | 0.904  | 21.8   |       |           |        |        |
| 33    | 353.285   | 0.883  | 18.7   |       |           |        |        |
| 34    | 11.324    | 0.028  | 4.6    |       |           |        |        |
| 35    | 4.568     | 0.011  | 11.6   |       |           |        |        |
| 36    | 2.572     | 0.006  | 10.6   |       |           |        |        |
| 37    | -2.342    | -0.006 | 16.4   |       |           |        |        |
| 38    | -13.091   | -0.033 | 373.6  |       |           |        |        |
| 39    | -16.315   | -0.041 | 19.2   |       |           |        |        |

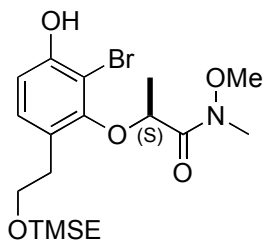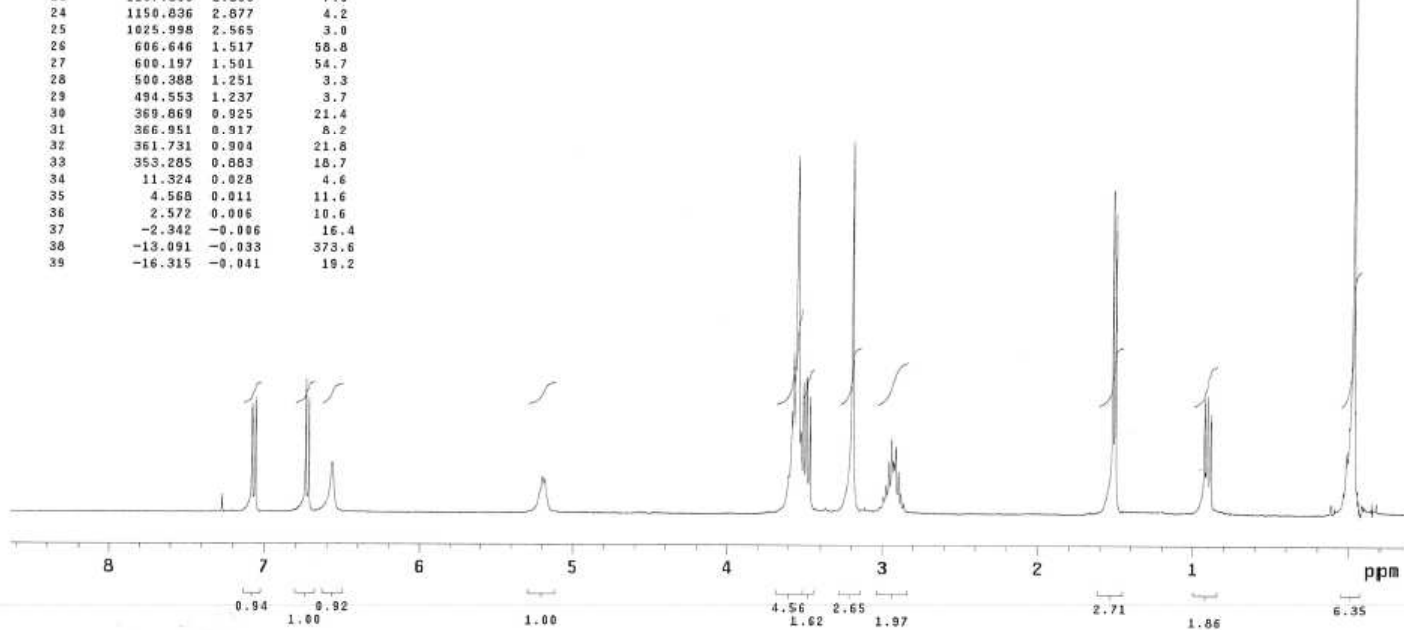



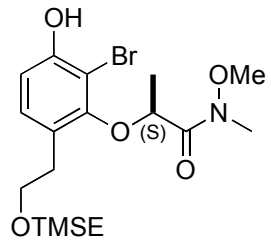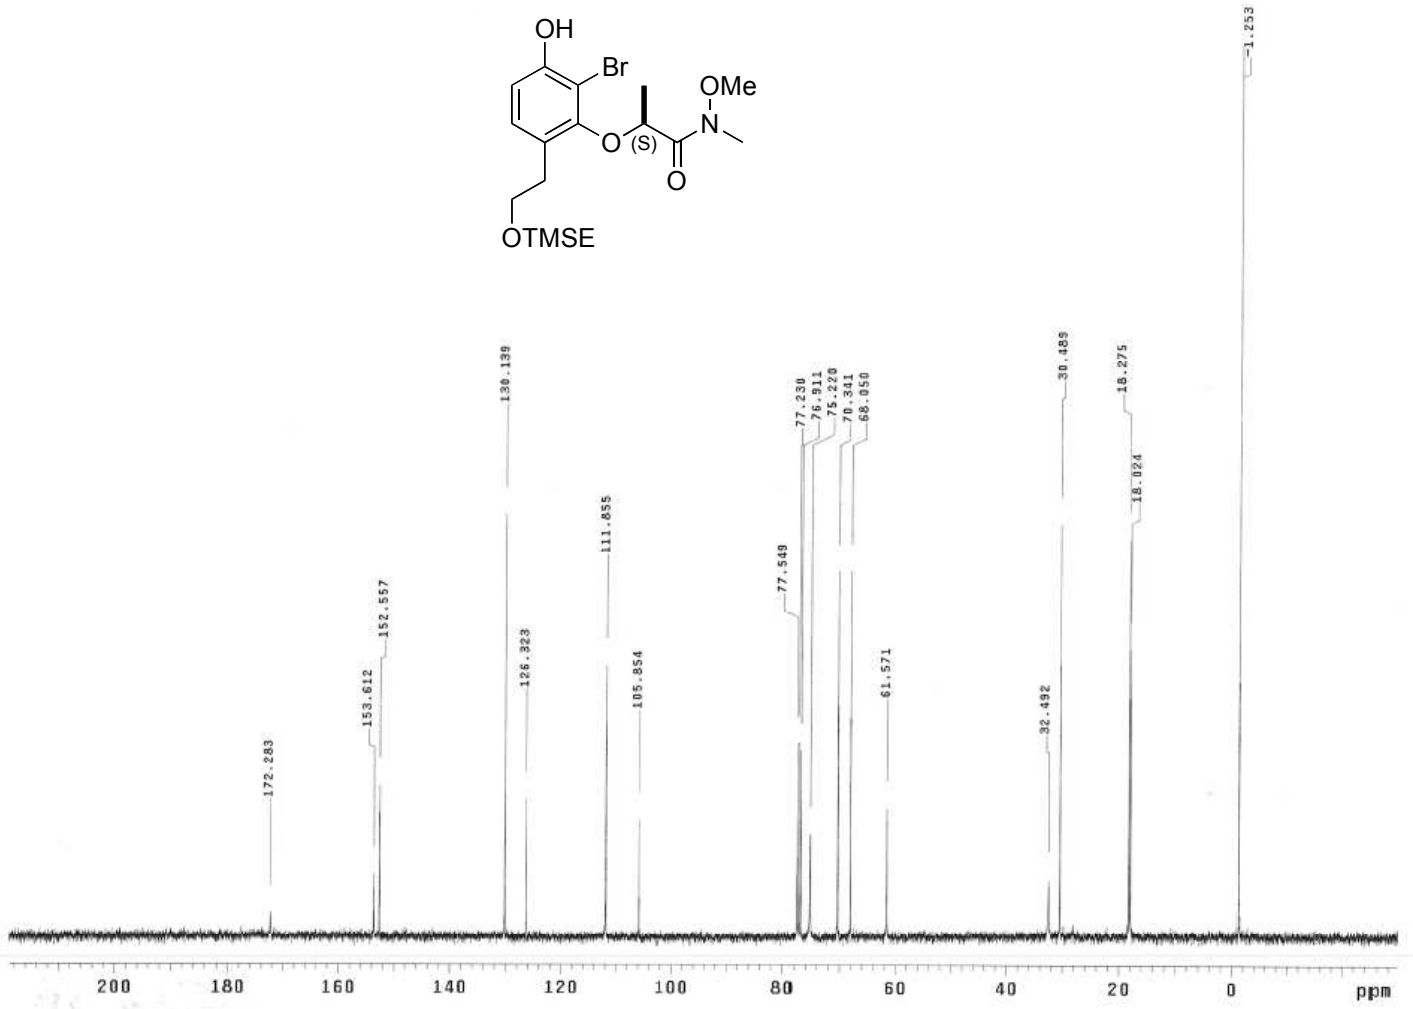

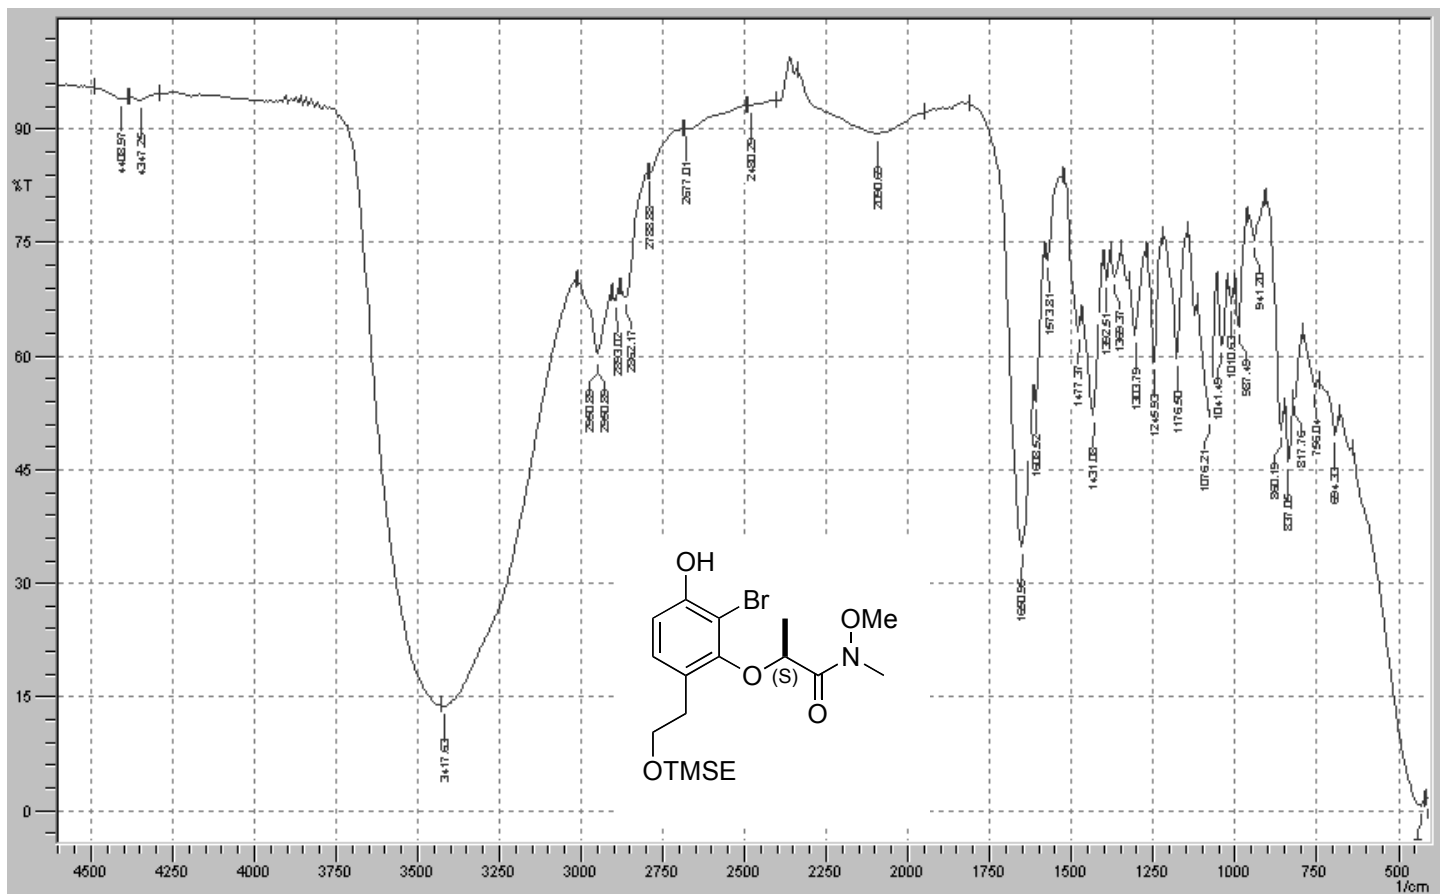

Compound 15:

| INDEX | FREQUENCY | PPM   | HEIGHT | INDEX | FREQUENCY | PPM    | HEIGHT |
|-------|-----------|-------|--------|-------|-----------|--------|--------|
| 1     | 2739.794  | 6.850 | 11.4   | 40    | 11.324    | 0.028  | 5.5    |
| 2     | 2738.105  | 6.846 | 17.5   | 41    | -0.499    | -0.001 | 11.0   |
| 3     | 2729.660  | 6.825 | 12.9   | 42    | -12.783   | -0.032 | 173.6  |
| 4     | 2727.971  | 6.821 | 19.2   | 43    | -14.780   | -0.037 | 275.9  |
| 5     | 2549.543  | 6.375 | 11.3   | 44    | -30.595   | -0.076 | 7.3    |
| 6     | 2547.393  | 6.369 | 19.5   | 45    | -37.659   | -0.094 | 6.8    |
| 7     | 2539.562  | 6.350 | 10.6   | 46    | -39.809   | -0.100 | 7.3    |
| 8     | 2537.412  | 6.344 | 17.6   | 47    | -74.665   | -0.187 | 4.7    |
| 9     | 1986.928  | 4.968 | 4.7    |       |           |        |        |
| 10    | 1979.711  | 4.950 | 12.2   |       |           |        |        |
| 11    | 1972.647  | 4.932 | 12.5   |       |           |        |        |
| 12    | 1965.430  | 4.914 | 4.8    |       |           |        |        |
| 13    | 1354.599  | 3.387 | 19.8   |       |           |        |        |
| 14    | 1349.532  | 3.374 | 30.4   |       |           |        |        |
| 15    | 1342.929  | 3.358 | 31.9   |       |           |        |        |
| 16    | 1334.177  | 3.336 | 21.2   |       |           |        |        |
| 17    | 1326.039  | 3.316 | 17.1   |       |           |        |        |
| 18    | 1324.196  | 3.311 | 13.8   |       |           |        |        |
| 19    | 958.742   | 2.397 | 4.3    |       |           |        |        |
| 20    | 953.828   | 2.385 | 6.7    |       |           |        |        |
| 21    | 948.607   | 2.372 | 5.5    |       |           |        |        |
| 22    | 944.461   | 2.361 | 8.7    |       |           |        |        |
| 23    | 939.548   | 2.349 | 13.5   |       |           |        |        |
| 24    | 934.634   | 2.337 | 7.9    |       |           |        |        |
| 25    | 927.263   | 2.318 | 8.2    |       |           |        |        |
| 26    | 820.507   | 2.302 | 13.0   |       |           |        |        |
| 27    | 913.904   | 2.285 | 9.1    |       |           |        |        |
| 28    | 906.227   | 2.266 | 6.6    |       |           |        |        |
| 29    | 899.778   | 2.250 | 4.2    |       |           |        |        |
| 30    | 740.544   | 1.052 | 52.9   |       |           |        |        |
| 31    | 735.323   | 1.039 | 36.1   |       |           |        |        |
| 32    | 733.327   | 1.034 | 51.7   |       |           |        |        |
| 33    | 490.868   | 1.227 | 6.3    |       |           |        |        |
| 34    | 339.773   | 0.859 | 18.5   |       |           |        |        |
| 35    | 332.402   | 0.831 | 23.7   |       |           |        |        |
| 36    | 330.406   | 0.826 | 19.3   |       |           |        |        |
| 37    | 323.189   | 0.808 | 17.0   |       |           |        |        |
| 38    | 43.877    | 0.110 | 4.6    |       |           |        |        |
| 39    | 14.395    | 0.036 | 5.5    |       |           |        |        |

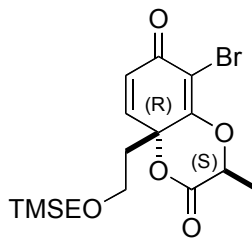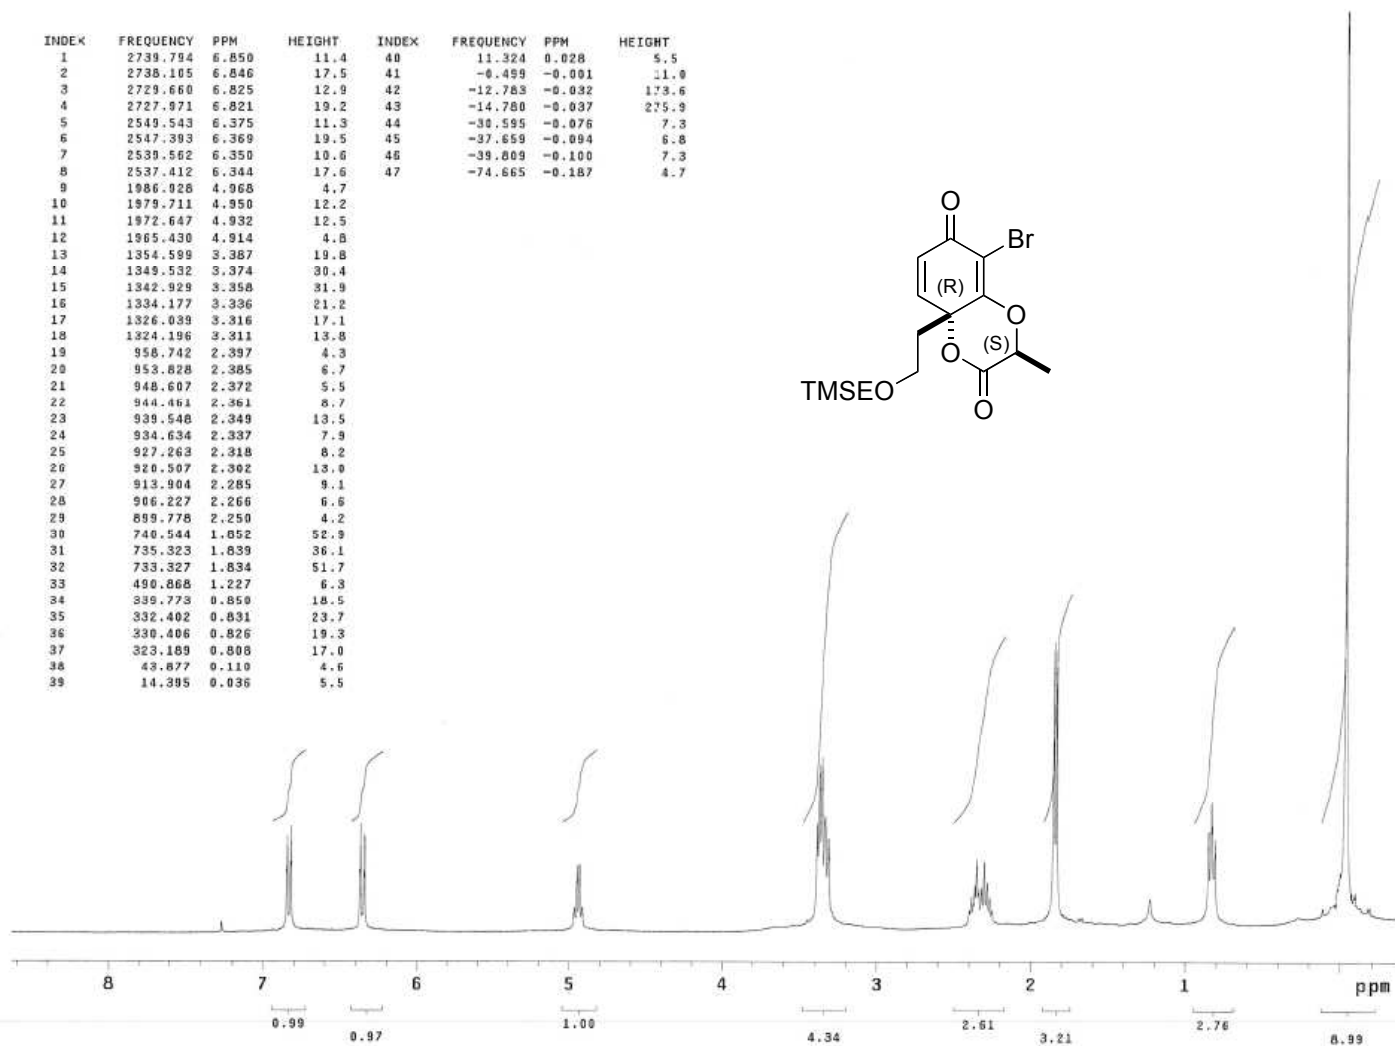



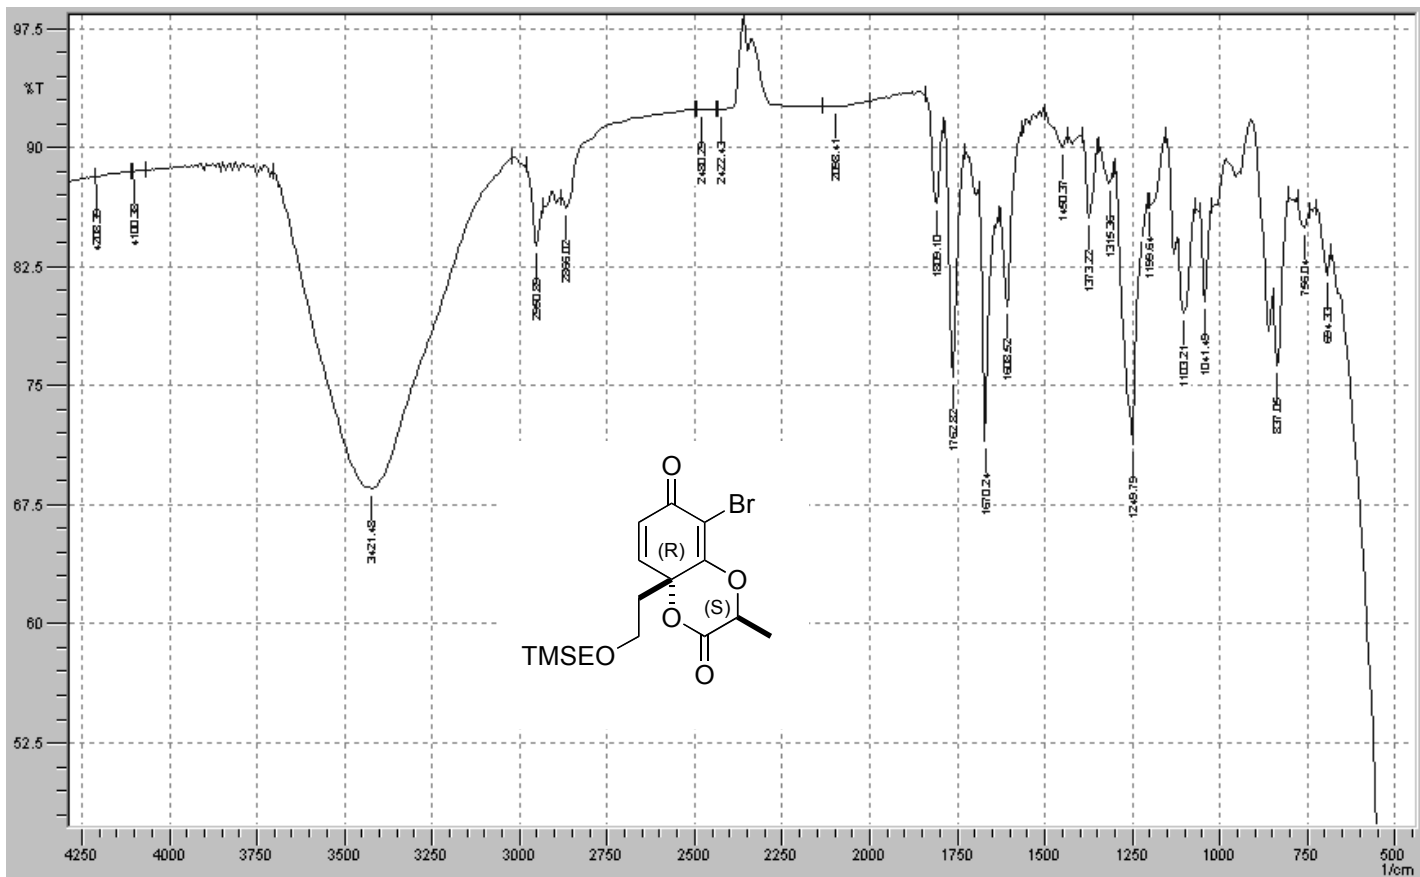

Compound 16:

| INDEX | FREQUENCY | PPM   | HEIGHT | INDEX | FREQUENCY | PPM    | HEIGHT |
|-------|-----------|-------|--------|-------|-----------|--------|--------|
| 1     | 2907.627  | 7.270 | 8.2    | 40    | 829.545   | 2.052  | 3.0    |
| 2     | 2865.767  | 7.165 | 13.7   | 41    | 818.395   | 2.046  | 2.2    |
| 3     | 2855.573  | 7.140 | 14.5   | 42    | 668.989   | 1.673  | 37.7   |
| 4     | 2455.108  | 6.139 | 13.6   | 43    | 662.079   | 1.655  | 38.4   |
| 5     | 2444.974  | 6.113 | 13.6   | 44    | 649.487   | 1.624  | 6.8    |
| 6     | 1854.412  | 4.637 | 5.3    | 45    | 647.491   | 1.619  | 5.9    |
| 7     | 1852.569  | 4.632 | 13.7   | 46    | 367.105   | 0.918  | 11.5   |
| 8     | 1847.502  | 4.619 | 12.0   | 47    | 363.266   | 0.908  | 5.5    |
| 9     | 1840.439  | 4.602 | 24.3   | 48    | 360.502   | 0.901  | 5.5    |
| 10    | 1833.529  | 4.584 | 5.1    | 49    | 358.506   | 0.896  | 12.2   |
| 11    | 1654.948  | 4.138 | 11.5   | 50    | 356.970   | 0.893  | 10.2   |
| 12    | 1642.970  | 4.108 | 10.6   | 51    | 354.053   | 0.885  | 6.0    |
| 13    | 1476.685  | 3.677 | 2.4    | 52    | 350.214   | 0.876  | 12.0   |
| 14    | 1465.311  | 3.664 | 6.2    | 53    | 21.305    | 0.053  | 3.4    |
| 15    | 1460.397  | 3.651 | 8.8    | 54    | 15.163    | 0.038  | 6.7    |
| 16    | 1456.097  | 3.641 | 11.6   | 55    | 4.722     | 0.012  | 27.2   |
| 17    | 1453.948  | 3.635 | 9.8    | 56    | 1.497     | 0.004  | 267.0  |
| 18    | 1451.951  | 3.630 | 9.2    | 57    | -1.881    | -0.005 | 29.8   |
| 19    | 1449.802  | 3.625 | 8.9    | 58    | -5.259    | -0.013 | 21.5   |
| 20    | 1396.980  | 3.493 | 10.6   | 59    | -8.637    | -0.022 | 14.3   |
| 21    | 1394.830  | 3.488 | 6.0    | 60    | -26.757   | -0.067 | 2.2    |
| 22    | 1389.609  | 3.474 | 15.2   | 61    | -28.446   | -0.071 | 2.4    |
| 23    | 1388.381  | 3.471 | 16.2   |       |           |        |        |
| 24    | 1383.160  | 3.458 | 6.4    |       |           |        |        |
| 25    | 1381.019  | 3.453 | 10.0   |       |           |        |        |
| 26    | 1380.243  | 3.451 | 10.9   |       |           |        |        |
| 27    | 1030.604  | 2.577 | 2.5    |       |           |        |        |
| 28    | 973.636   | 2.434 | 3.0    |       |           |        |        |
| 29    | 969.490   | 2.424 | 5.5    |       |           |        |        |
| 30    | 965.037   | 2.413 | 3.6    |       |           |        |        |
| 31    | 959.202   | 2.398 | 4.3    |       |           |        |        |
| 32    | 954.749   | 2.387 | 6.0    |       |           |        |        |
| 33    | 950.450   | 2.376 | 3.9    |       |           |        |        |
| 34    | 850.334   | 2.126 | 3.2    |       |           |        |        |
| 35    | 844.038   | 2.110 | 4.1    |       |           |        |        |
| 36    | 841.274   | 2.103 | 4.0    |       |           |        |        |
| 37    | 835.206   | 2.080 | 5.3    |       |           |        |        |
| 38    | 829.604   | 2.074 | 3.9    |       |           |        |        |
| 39    | 826.687   | 2.067 | 3.4    |       |           |        |        |

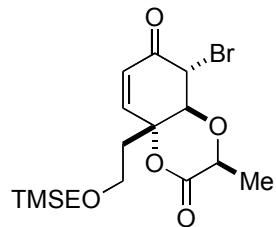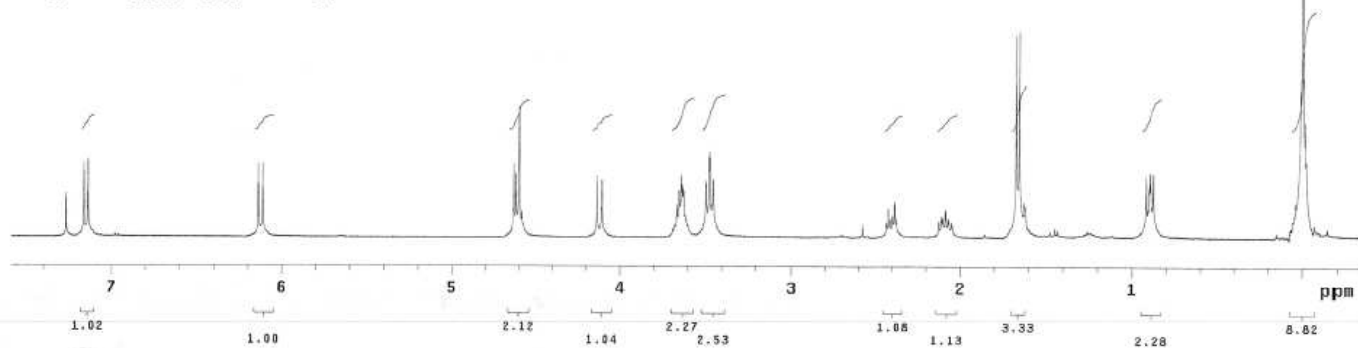

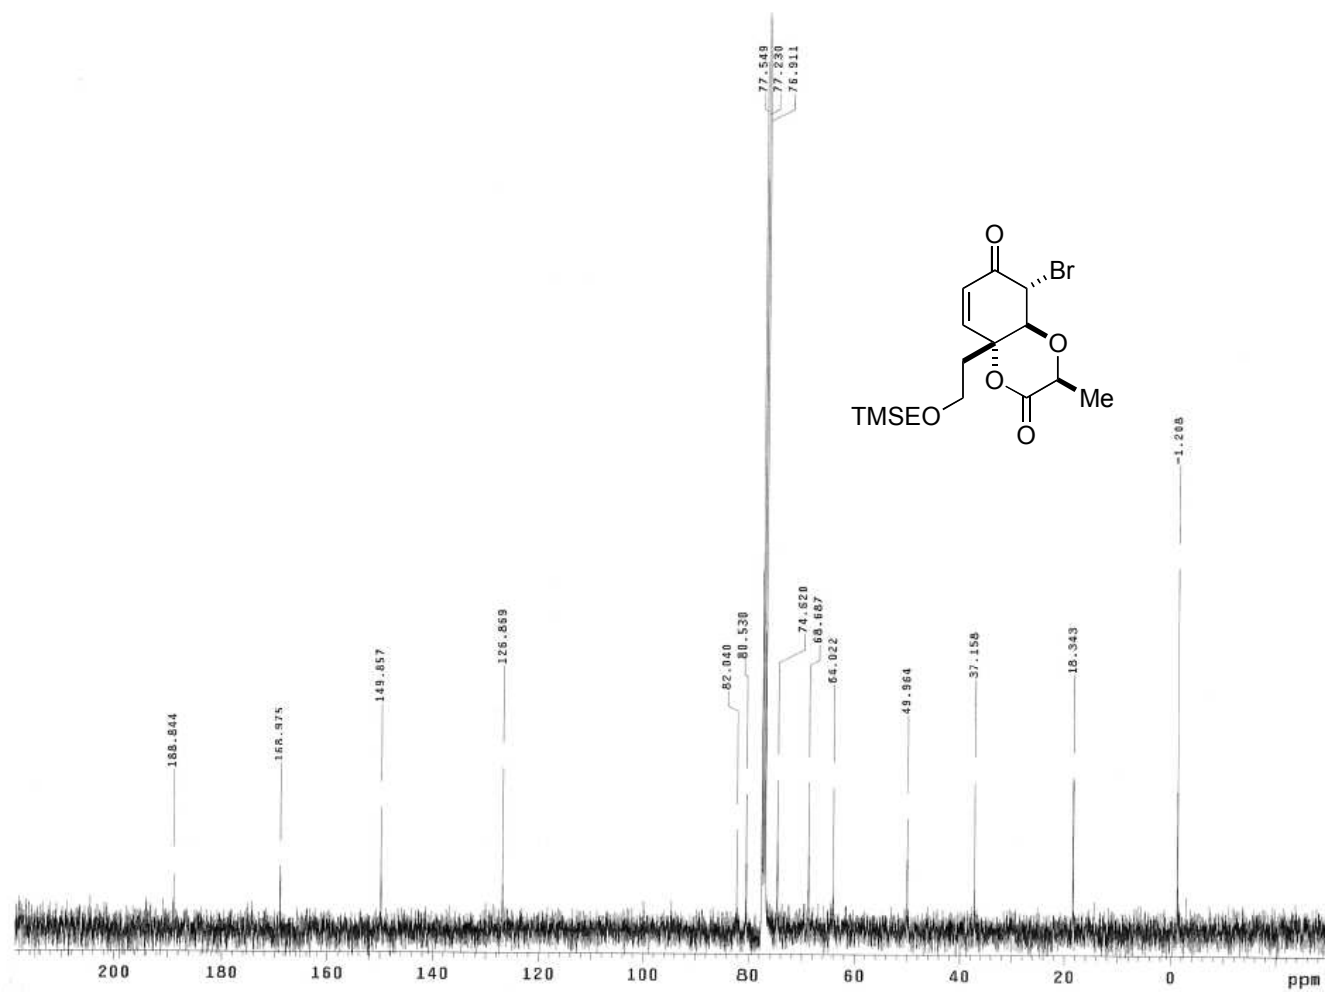

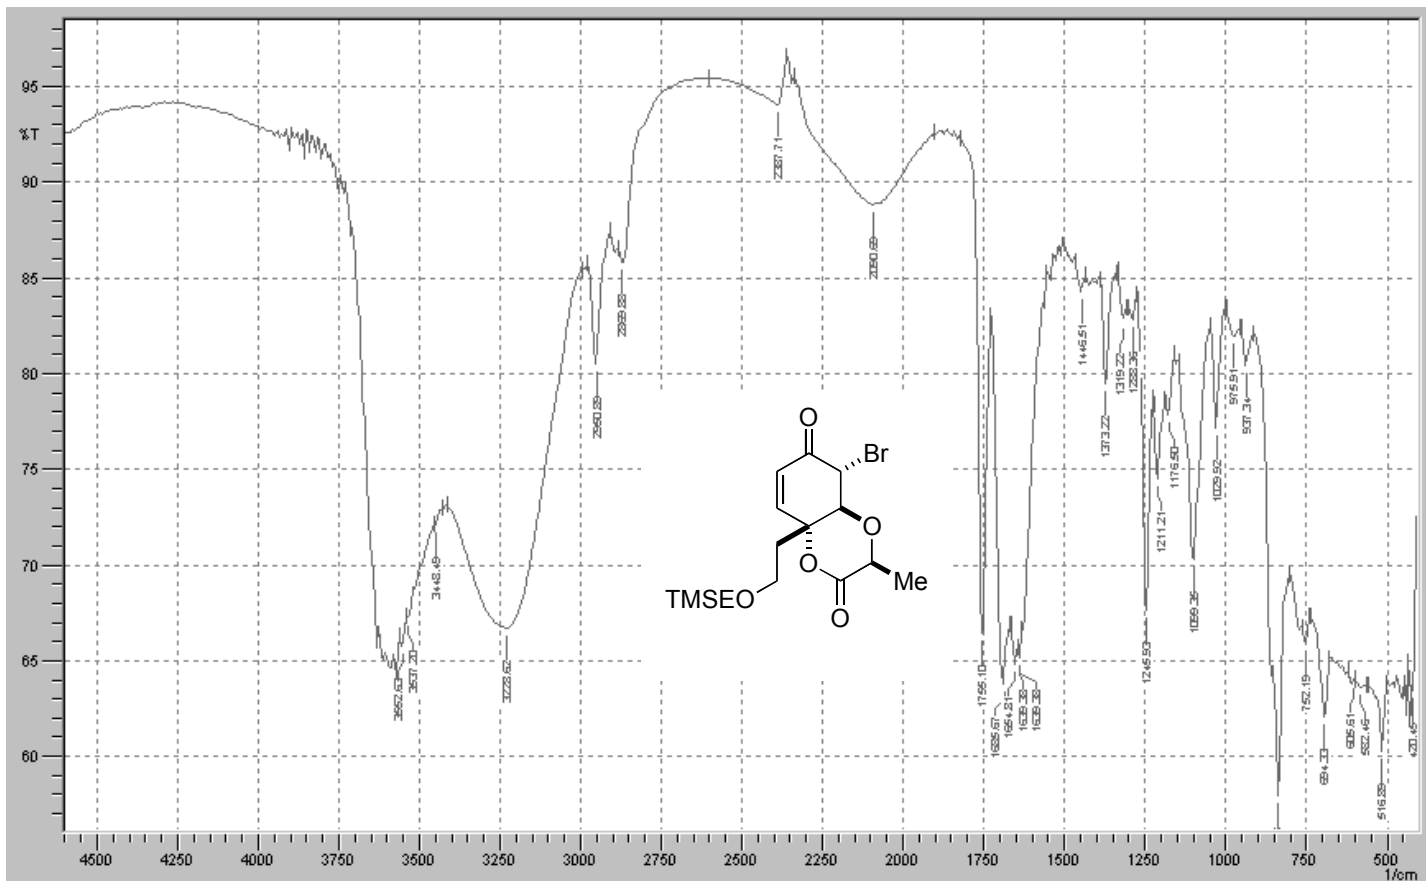



Compound 17:

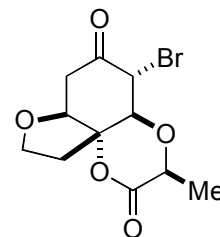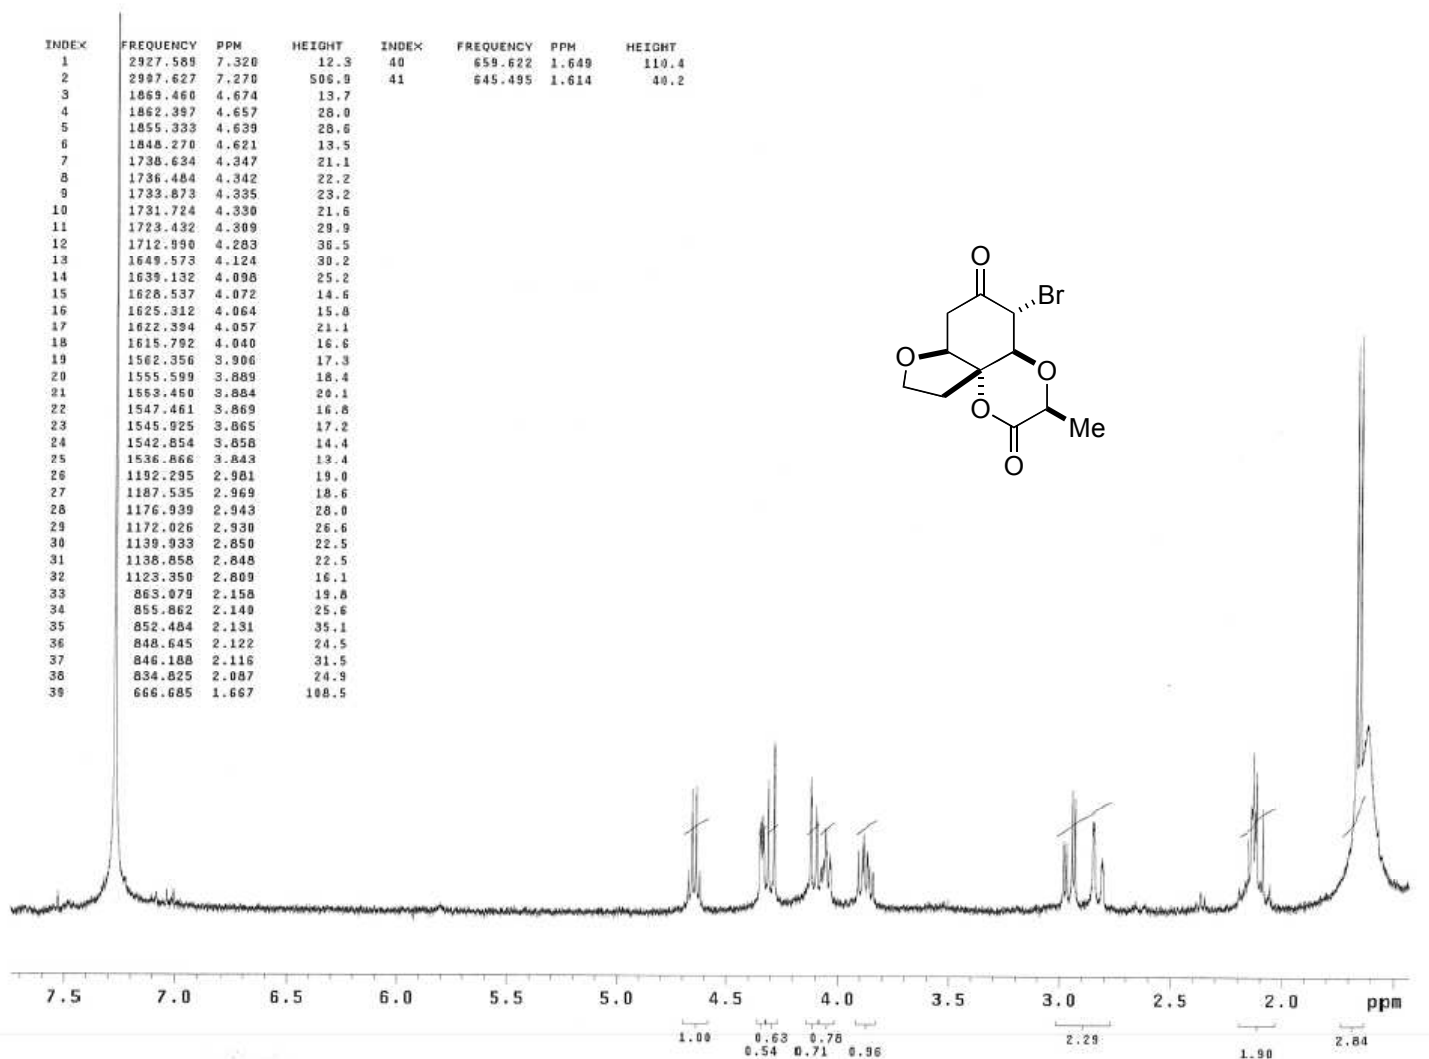

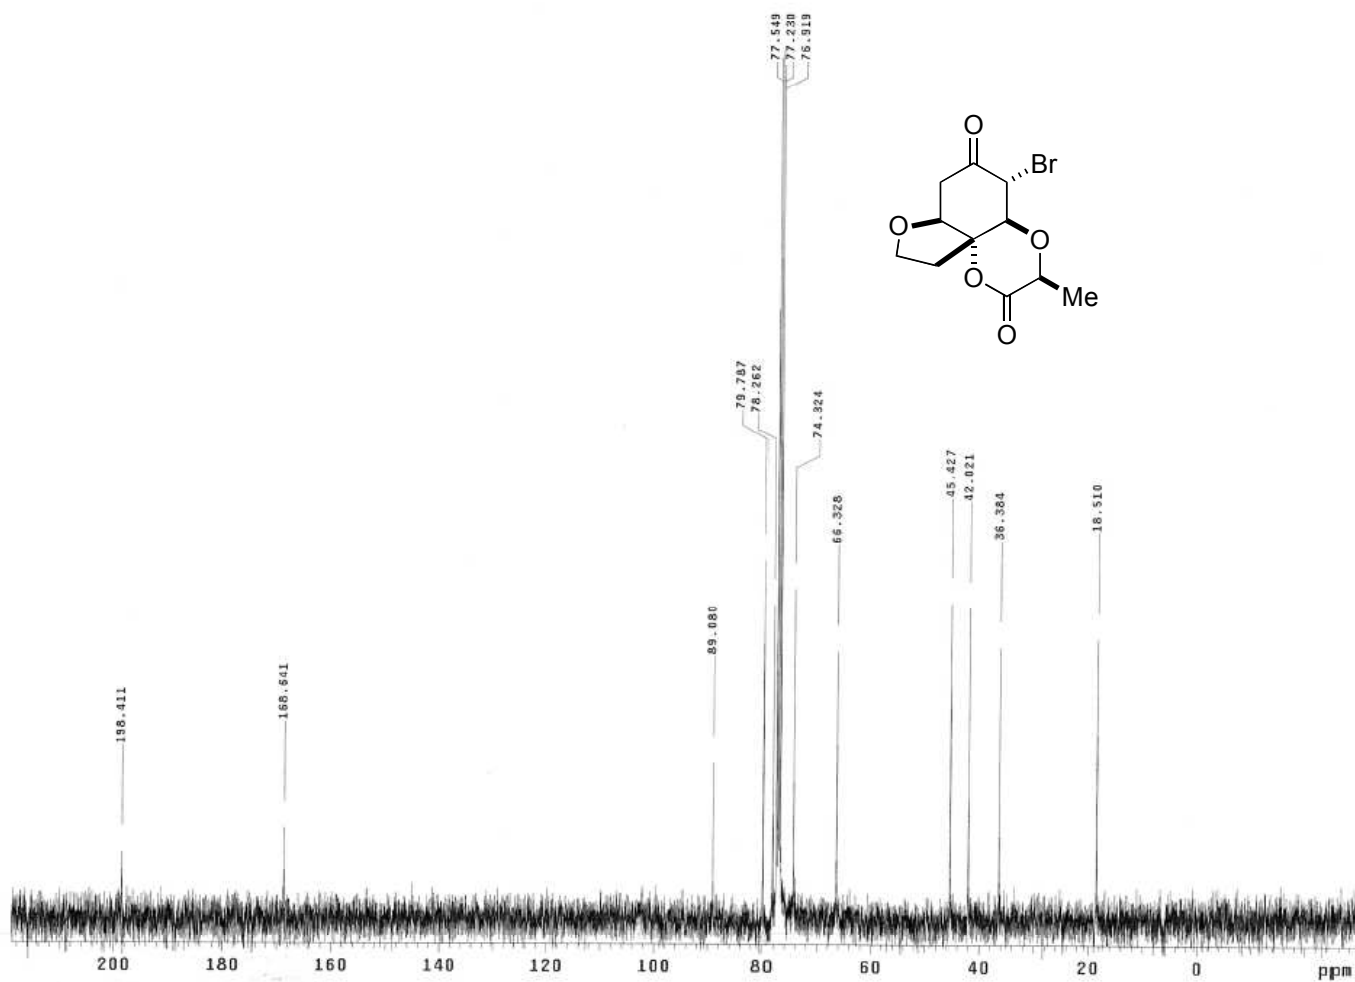

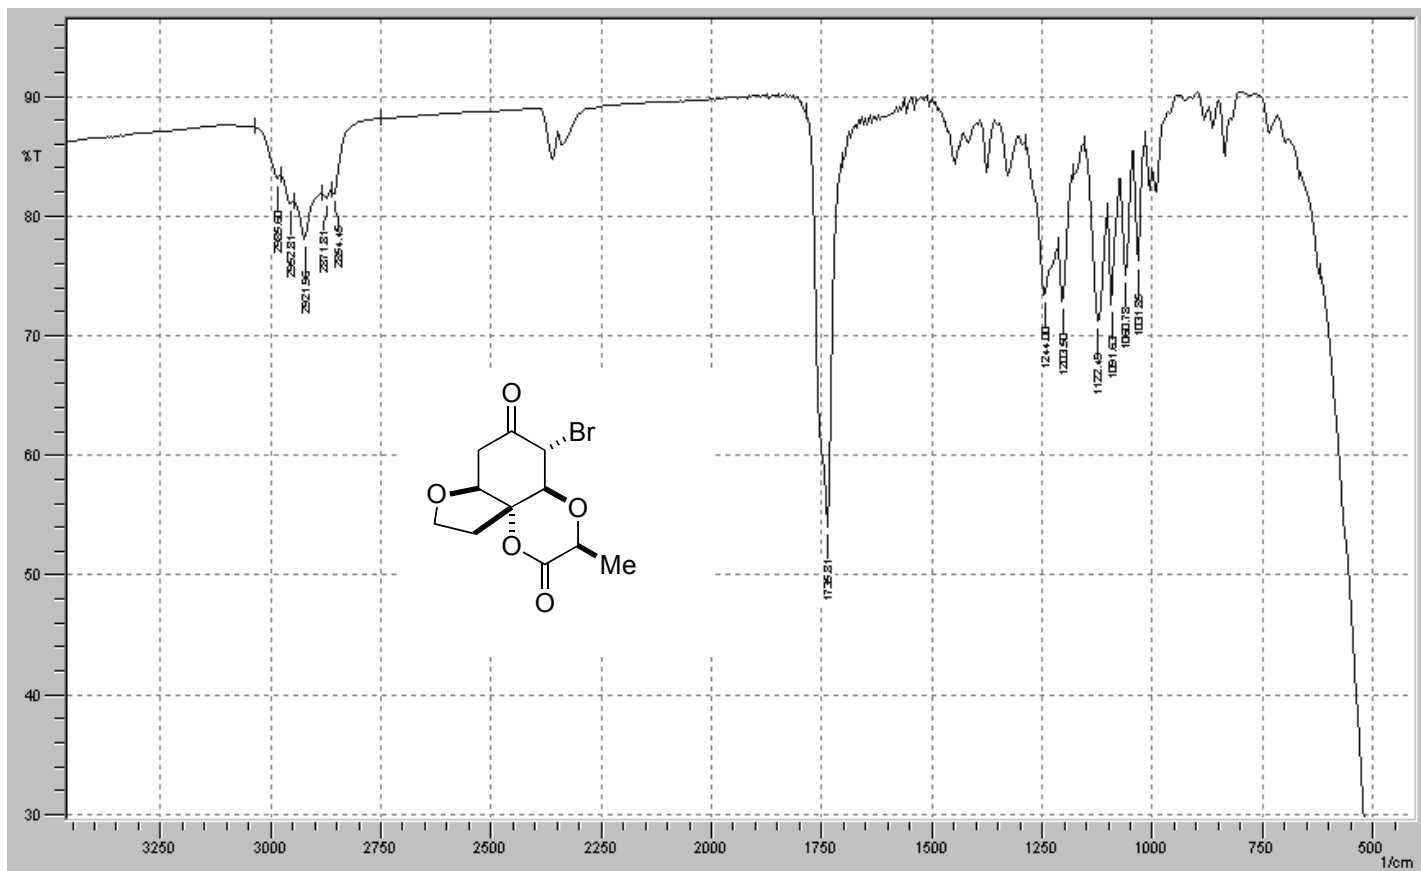

Compound 19:

| INDEX | FREQUENCY | PPM   | HEIGHT | INDEX | FREQUENCY | PPM   | HEIGHT |
|-------|-----------|-------|--------|-------|-----------|-------|--------|
| 1     | 9633.956  | 7.270 | 319.7  | 40    | 1654.060  | 3.311 | 3.5    |
| 2     | 9527.957  | 7.058 | 3.0    | 41    | 1390.616  | 2.602 | 3.8    |
| 3     | 9524.753  | 7.052 | 12.5   | 42    | 1294.666  | 2.590 | 4.2    |
| 4     | 9514.501  | 7.031 | 13.0   | 43    | 1267.709  | 2.576 | 7.3    |
| 5     | 9186.986  | 6.376 | 4.2    | 44    | 1261.851  | 2.564 | 7.3    |
| 6     | 9134.811  | 6.271 | 10.1   | 45    | 1274.711  | 2.550 | 4.6    |
| 7     | 9133.621  | 6.269 | 10.7   | 46    | 1268.578  | 2.538 | 3.8    |
| 8     | 9124.559  | 6.251 | 9.7    | 47    | 1012.644  | 2.026 | 8.4    |
| 9     | 9123.552  | 6.249 | 10.2   | 48    | 1019.257  | 2.019 | 9.4    |
| 10    | 2160.137  | 4.322 | 4.1    | 49    | 1016.328  | 2.013 | 10.9   |
| 11    | 2153.638  | 4.309 | 11.3   | 50    | 1012.301  | 2.005 | 11.3   |
| 12    | 2146.956  | 4.295 | 11.0   | 51    | 1010.104  | 2.001 | 8.7    |
| 13    | 2140.457  | 4.282 | 3.9    | 52    | 955.802   | 1.992 | 9.0    |
| 14    | 2062.103  | 4.125 | 12.1   | 53    | 928.753   | 1.978 | 4.9    |
| 15    | 1977.615  | 3.956 | 5.7    | 54    | 923.261   | 1.967 | 2.9    |
| 16    | 1971.940  | 3.945 | 6.0    | 55    | 923.581   | 1.928 | 2.6    |
| 17    | 1965.532  | 3.932 | 6.6    | 56    | 956.991   | 1.915 | 5.5    |
| 18    | 1959.582  | 3.920 | 6.4    | 57    | 949.393   | 1.899 | 10.2   |
| 19    | 1811.752  | 3.625 | 3.3    | 58    | 944.725   | 1.890 | 9.0    |
| 20    | 1804.429  | 3.610 | 6.6    | 59    | 942.162   | 1.885 | 11.9   |
| 21    | 1801.775  | 3.605 | 5.7    | 60    | 938.409   | 1.877 | 7.2    |
| 22    | 1798.754  | 3.599 | 8.7    | 61    | 934.930   | 1.870 | 7.7    |
| 23    | 1792.255  | 3.586 | 9.4    | 62    | 927.882   | 1.856 | 3.0    |
| 24    | 1789.234  | 3.579 | 8.7    | 63    | 841.930   | 1.684 | 4.2    |
| 25    | 1785.756  | 3.573 | 10.3   | 64    | 788.107   | 1.577 | 47.8   |
| 26    | 1776.785  | 3.555 | 5.1    | 65    | 764.582   | 1.530 | 7.9    |
| 27    | 1773.490  | 3.548 | 4.3    | 66    | 746.824   | 1.494 | 51.5   |
| 28    | 1749.233  | 3.499 | 5.4    | 67    | 740.142   | 1.481 | 49.3   |
| 29    | 1742.002  | 3.485 | 9.2    | 68    | 724.764   | 1.450 | 3.4    |
| 30    | 1735.411  | 3.472 | 9.2    | 69    | 719.547   | 1.440 | 5.9    |
| 31    | 1730.651  | 3.462 | 9.4    | 70    | 714.787   | 1.430 | 4.6    |
| 32    | 1723.786  | 3.449 | 8.8    |       |           |       |        |
| 33    | 1717.836  | 3.437 | 4.5    |       |           |       |        |
| 34    | 1690.467  | 3.382 | 12.5   |       |           |       |        |
| 35    | 1679.208  | 3.359 | 4.9    |       |           |       |        |
| 36    | 1671.977  | 3.345 | 8.7    |       |           |       |        |
| 37    | 1669.048  | 3.339 | 4.6    |       |           |       |        |
| 38    | 1665.020  | 3.331 | 5.9    |       |           |       |        |
| 39    | 1662.091  | 3.325 | 6.5    |       |           |       |        |

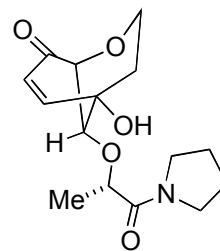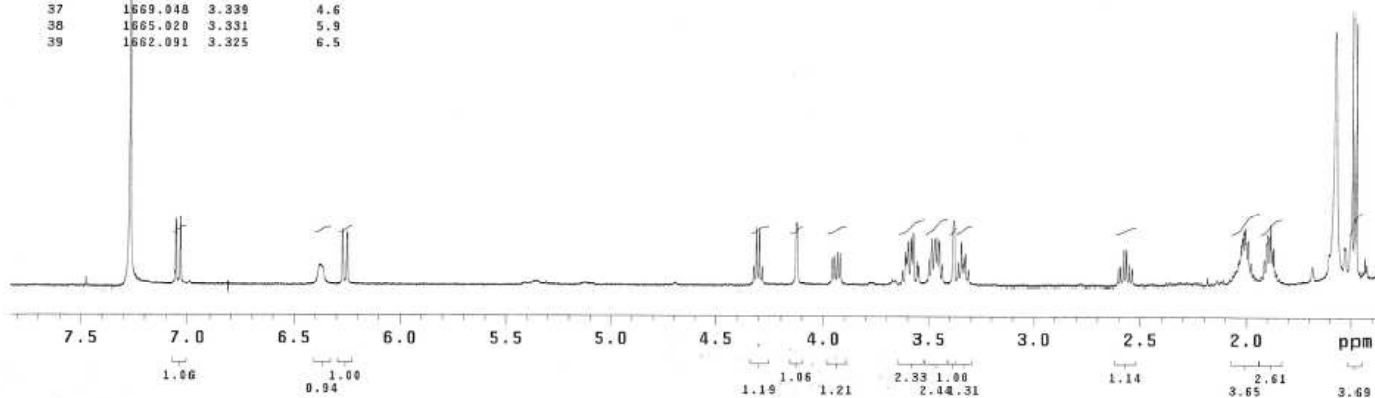

| INDEX | FREQUENCY | PPM     | HEIGHT |
|-------|-----------|---------|--------|
| 1     | 21660.200 | 172.332 | 6.4    |
| 2     | 19607.697 | 156.002 | 8.7    |
| 3     | 16395.766 | 129.970 | 19.5   |
| 4     | 12813.740 | 101.948 | 6.4    |
| 5     | 9972.145  | 79.340  | 10.0   |
| 6     | 9738.867  | 77.484  | 516.5  |
| 7     | 9706.958  | 77.230  | 541.8  |
| 8     | 9675.049  | 76.976  | 539.0  |
| 9     | 9189.520  | 73.113  | 18.2   |
| 10    | 8664.752  | 68.930  | 9.9    |
| 11    | 7797.182  | 62.036  | 13.3   |
| 12    | 5880.506  | 46.786  | 10.9   |
| 13    | 5817.983  | 46.289  | 12.2   |
| 14    | 3858.619  | 30.700  | 11.6   |
| 15    | 3760.737  | 29.921  | 39.4   |
| 16    | 3322.639  | 26.435  | 17.4   |
| 17    | 3003.984  | 23.900  | 16.1   |
| 18    | 2291.746  | 18.552  | 20.3   |

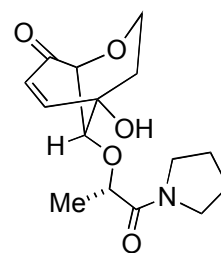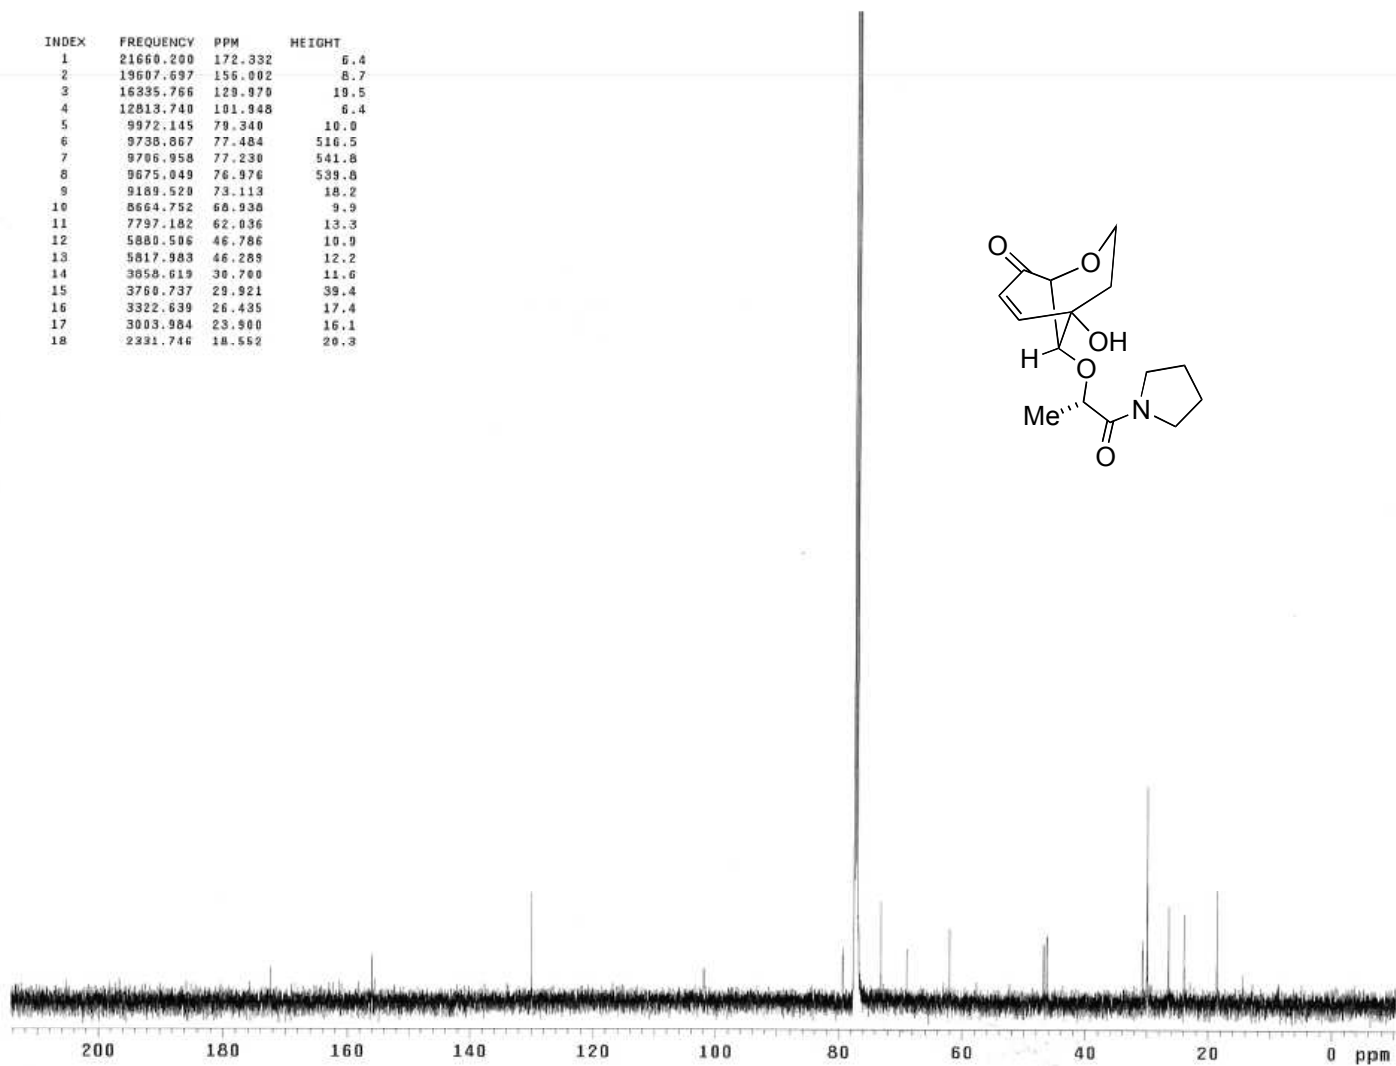

Compound 20:

| INDEX | FREQUENCY | PPM   | HEIGHT | INDEX | FREQUENCY | PPM   | HEIGHT |
|-------|-----------|-------|--------|-------|-----------|-------|--------|
| 1     | 3633.956  | 7.270 | 65.7   | 40    | 1162.948  | 2.327 | 4.7    |
| 2     | 2290.448  | 4.598 | 4.8    | 41    | 1160.475  | 2.322 | 5.6    |
| 3     | 2291.308  | 4.584 | 15.2   | 42    | 1156.998  | 2.315 | 5.4    |
| 4     | 2284.260  | 4.570 | 15.4   | 43    | 1148.941  | 2.299 | 4.7    |
| 5     | 2277.303  | 4.556 | 5.0    | 44    | 1037.542  | 2.076 | 6.8    |
| 6     | 2151.075  | 4.303 | 8.5    | 45    | 1033.423  | 2.067 | 7.1    |
| 7     | 2145.034  | 4.291 | 9.1    | 46    | 1023.629  | 2.048 | 5.4    |
| 8     | 2138.626  | 4.278 | 17.5   | 47    | 1019.326  | 2.039 | 5.6    |
| 9     | 2136.521  | 4.274 | 10.7   | 48    | 803.760   | 1.608 | 53.7   |
| 10    | 2134.141  | 4.270 | 11.3   | 49    | 796.711   | 1.594 | 53.9   |
| 11    | 2132.219  | 4.266 | 16.0   | 50    | 788.198   | 1.577 | 33.2   |
| 12    | 2029.424  | 4.060 | 4.9    |       |           |       |        |
| 13    | 2021.186  | 4.044 | 10.3   |       |           |       |        |
| 14    | 2012.673  | 4.027 | 6.2    |       |           |       |        |
| 15    | 1948.690  | 3.898 | 5.5    |       |           |       |        |
| 16    | 1943.747  | 3.889 | 6.1    |       |           |       |        |
| 17    | 1939.902  | 3.881 | 5.7    |       |           |       |        |
| 18    | 1937.156  | 3.875 | 6.4    |       |           |       |        |
| 19    | 1934.776  | 3.871 | 5.8    |       |           |       |        |
| 20    | 1932.122  | 3.865 | 6.4    |       |           |       |        |
| 21    | 1928.186  | 3.857 | 5.0    |       |           |       |        |
| 22    | 1923.243  | 3.848 | 4.4    |       |           |       |        |
| 23    | 1427.668  | 2.856 | 8.4    |       |           |       |        |
| 24    | 1421.626  | 2.844 | 8.5    |       |           |       |        |
| 25    | 1408.720  | 2.818 | 10.1   |       |           |       |        |
| 26    | 1402.678  | 2.806 | 9.8    |       |           |       |        |
| 27    | 1379.337  | 2.759 | 3.3    |       |           |       |        |
| 28    | 1376.957  | 2.755 | 3.7    |       |           |       |        |
| 29    | 1363.043  | 2.727 | 12.1   |       |           |       |        |
| 30    | 1360.847  | 2.722 | 12.0   |       |           |       |        |
| 31    | 1350.961  | 2.703 | 15.9   |       |           |       |        |
| 32    | 1346.384  | 2.694 | 15.7   |       |           |       |        |
| 33    | 1334.759  | 2.670 | 4.8    |       |           |       |        |
| 34    | 1330.182  | 2.661 | 5.0    |       |           |       |        |
| 35    | 1201.574  | 2.404 | 8.1    |       |           |       |        |
| 36    | 1188.942  | 2.379 | 8.0    |       |           |       |        |
| 37    | 1182.626  | 2.366 | 11.0   |       |           |       |        |
| 38    | 1174.480  | 2.350 | 4.6    |       |           |       |        |
| 39    | 1170.361  | 2.341 | 9.2    |       |           |       |        |

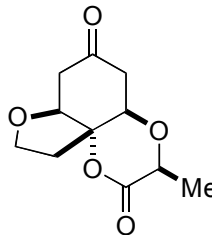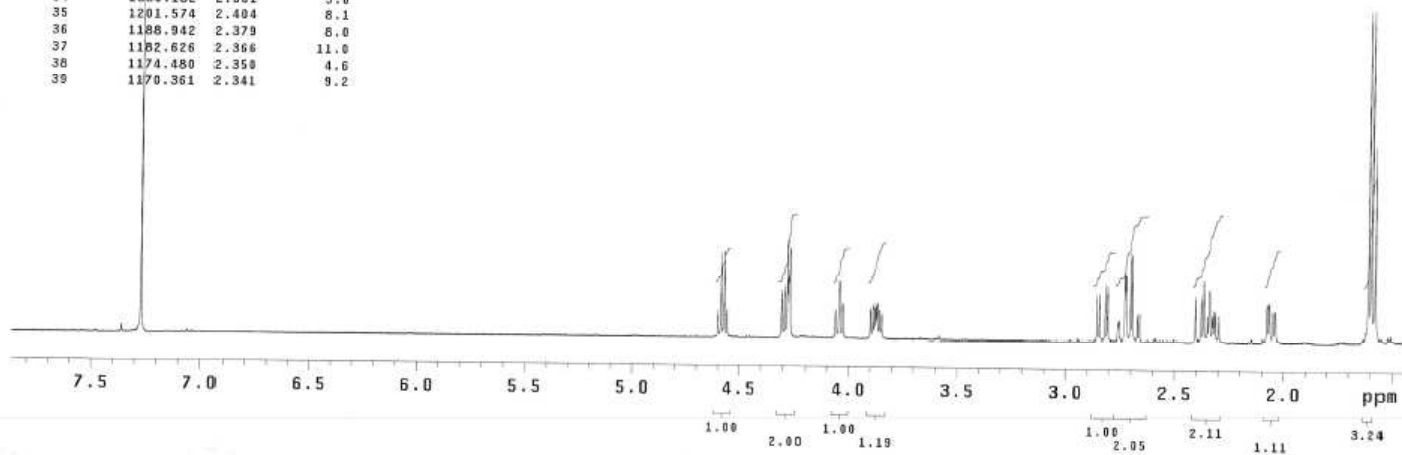

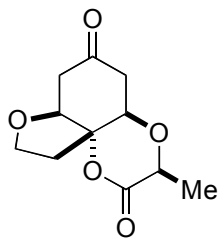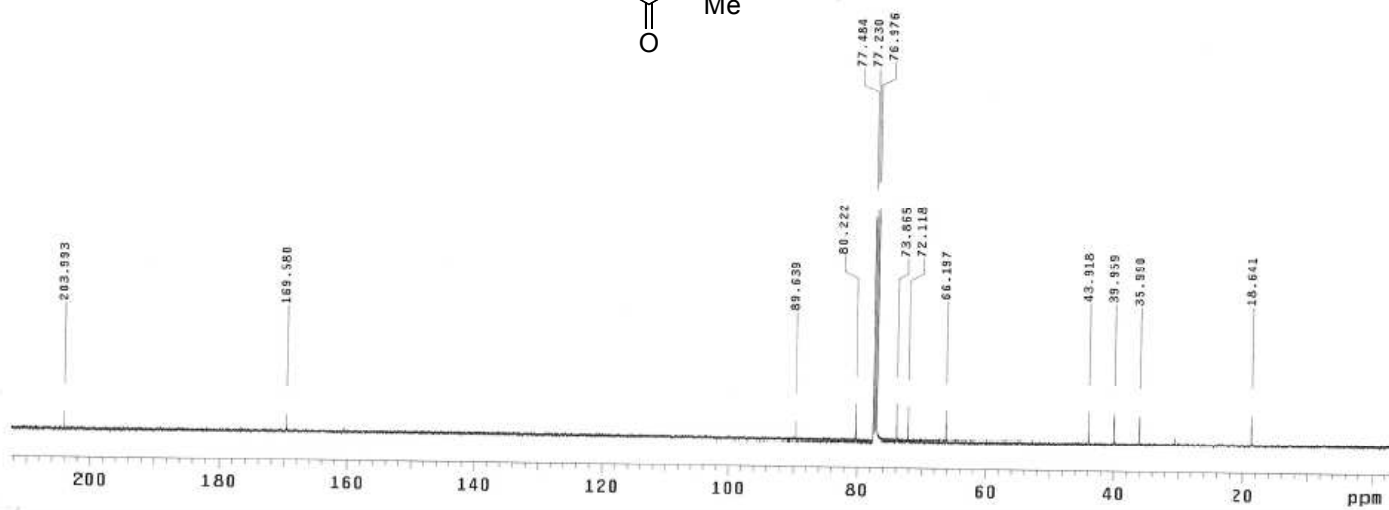

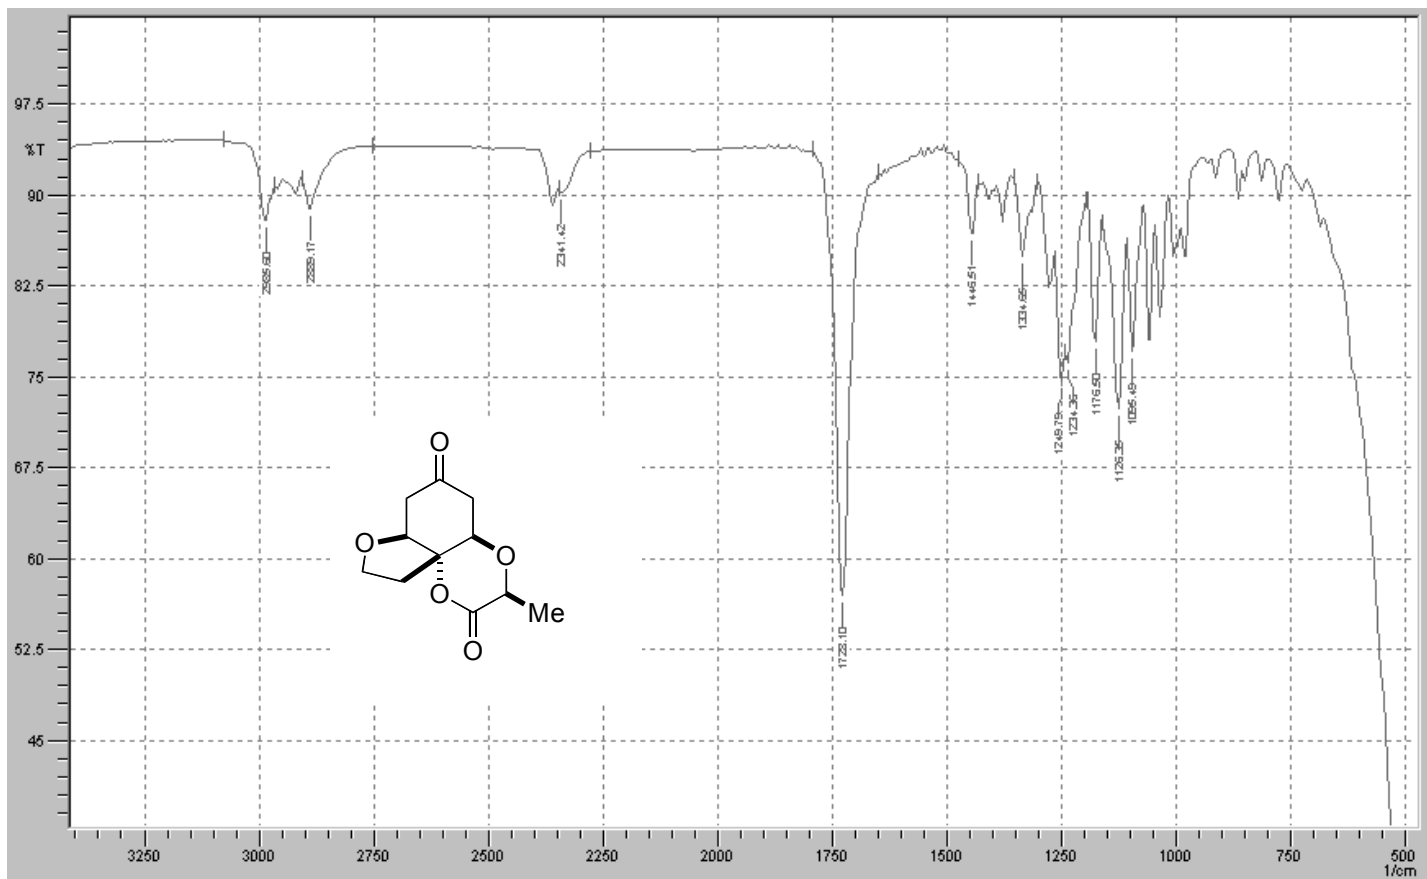



Compound 24:

| INDEX | FREQUENCY | PPM   | HEIGHT | INDEX | FREQUENCY | PPM   | HEIGHT |
|-------|-----------|-------|--------|-------|-----------|-------|--------|
| 1     | 2907.627  | 7.270 | 152.4  | 40    | 831.293   | 2.078 | 4.5    |
| 2     | 2891.350  | 7.229 | 18.1   | 41    | 825.919   | 2.065 | 4.9    |
| 3     | 2887.972  | 7.221 | 14.8   | 42    | 823.462   | 2.059 | 4.8    |
| 4     | 2885.976  | 7.216 | 16.5   | 43    | 817.320   | 2.044 | 4.8    |
| 5     | 2882.598  | 7.207 | 24.6   | 44    | 809.950   | 2.025 | 4.7    |
| 6     | 2878.605  | 7.197 | 6.6    | 45    | 711.676   | 1.779 | 6.8    |
| 7     | 2843.442  | 7.110 | 10.2   | 46    | 698.931   | 1.748 | 11.1   |
| 8     | 2838.528  | 7.097 | 16.1   | 47    | 695.879   | 1.715 | 5.7    |
| 9     | 2834.689  | 7.088 | 14.3   | 48    | 642.731   | 1.607 | 52.0   |
| 10    | 2829.929  | 7.076 | 9.1    | 49    | 635.821   | 1.590 | 55.7   |
| 11    | 2123.896  | 5.310 | 11.7   | 50    | 629.986   | 1.575 | 92.7   |
| 12    | 1979.711  | 4.950 | 5.1    | 51    | 612.021   | 1.530 | 11.9   |
| 13    | 1964.662  | 4.912 | 19.2   | 52    | 601.888   | 1.505 | 11.0   |
| 14    | 1958.213  | 4.896 | 21.0   | 53    | 598.201   | 1.496 | 11.5   |
| 15    | 1952.532  | 4.882 | 35.1   | 54    | 587.913   | 1.470 | 9.8    |
| 16    | 1943.319  | 4.850 | 7.1    | 55    | 575.782   | 1.440 | 6.9    |
| 17    | 1844.277  | 4.611 | 5.0    |       |           |       |        |
| 18    | 1837.214  | 4.594 | 14.9   |       |           |       |        |
| 19    | 1830.151  | 4.576 | 15.2   |       |           |       |        |
| 20    | 1823.087  | 4.558 | 5.7    |       |           |       |        |
| 21    | 1694.871  | 4.238 | 4.5    |       |           |       |        |
| 22    | 1684.737  | 4.212 | 10.3   |       |           |       |        |
| 23    | 1677.059  | 4.193 | 14.9   |       |           |       |        |
| 24    | 1673.681  | 4.185 | 9.9    |       |           |       |        |
| 25    | 1667.385  | 4.169 | 14.6   |       |           |       |        |
| 26    | 1665.389  | 4.164 | 15.2   |       |           |       |        |
| 27    | 1660.629  | 4.152 | 11.8   |       |           |       |        |
| 28    | 1657.712  | 4.145 | 10.7   |       |           |       |        |
| 29    | 1655.101  | 4.138 | 10.5   |       |           |       |        |
| 30    | 1653.258  | 4.134 | 13.1   |       |           |       |        |
| 31    | 1648.345  | 4.121 | 12.9   |       |           |       |        |
| 32    | 1047.802  | 2.620 | 4.1    |       |           |       |        |
| 33    | 1044.731  | 2.612 | 5.9    |       |           |       |        |
| 34    | 1039.817  | 2.600 | 10.5   |       |           |       |        |
| 35    | 1031.986  | 2.580 | 16.2   |       |           |       |        |
| 36    | 1025.890  | 2.565 | 11.4   |       |           |       |        |
| 37    | 1022.312  | 2.556 | 9.5    |       |           |       |        |
| 38    | 1018.913  | 2.545 | 12.8   |       |           |       |        |
| 39    | 1008.832  | 2.528 | 5.6    |       |           |       |        |

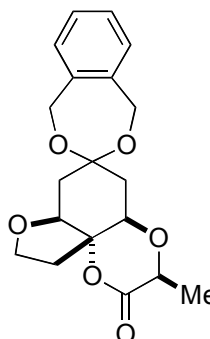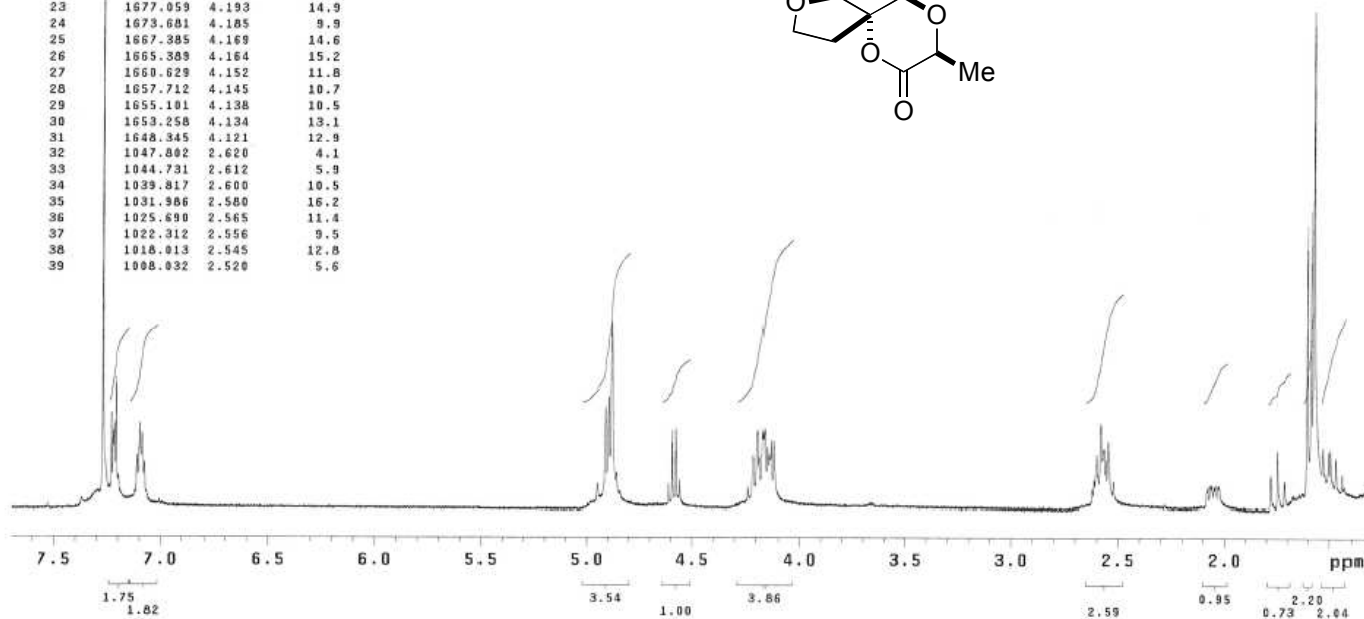

| INDEX | FREQUENCY | PPM     | HEIGHT |
|-------|-----------|---------|--------|
| 1     | 17119.961 | 170.234 | 8.8    |
| 2     | 13824.725 | 137.468 | 11.9   |
| 3     | 13804.125 | 137.263 | 11.1   |
| 4     | 12801.592 | 127.294 | 51.5   |
| 5     | 12713.089 | 126.414 | 53.2   |
| 6     | 10233.460 | 101.757 | 14.2   |
| 7     | 9177.519  | 91.258  | 14.2   |
| 8     | 7887.349  | 78.429  | 27.8   |
| 9     | 7798.846  | 77.549  | 84.7   |
| 10    | 7787.401  | 77.435  | 9.2    |
| 11    | 7766.001  | 77.230  | 86.1   |
| 12    | 7735.520  | 76.919  | 84.3   |
| 13    | 7494.423  | 74.522  | 28.4   |
| 14    | 7299.868  | 72.587  | 26.6   |
| 15    | 6591.076  | 65.539  | 26.6   |
| 16    | 6567.424  | 65.394  | 26.1   |
| 17    | 6540.720  | 65.038  | 29.2   |
| 18    | 3633.069  | 36.126  | 26.2   |
| 19    | 3410.284  | 33.911  | 25.6   |
| 20    | 3310.336  | 32.917  | 26.1   |
| 21    | 1882.070  | 18.715  | 28.3   |

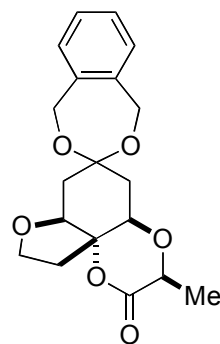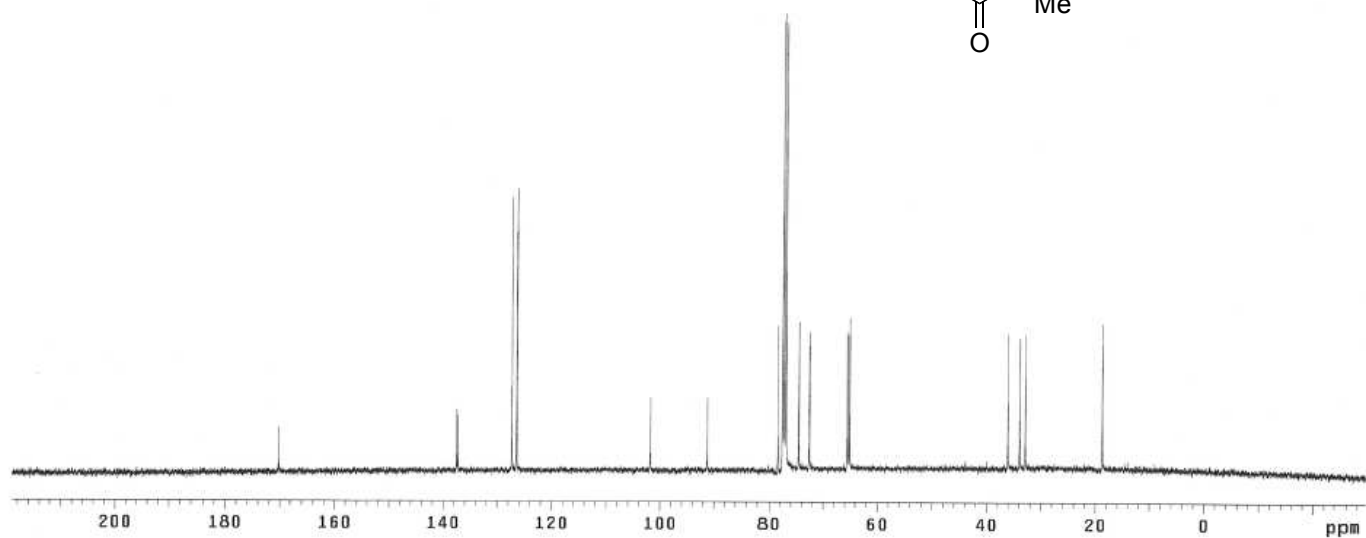

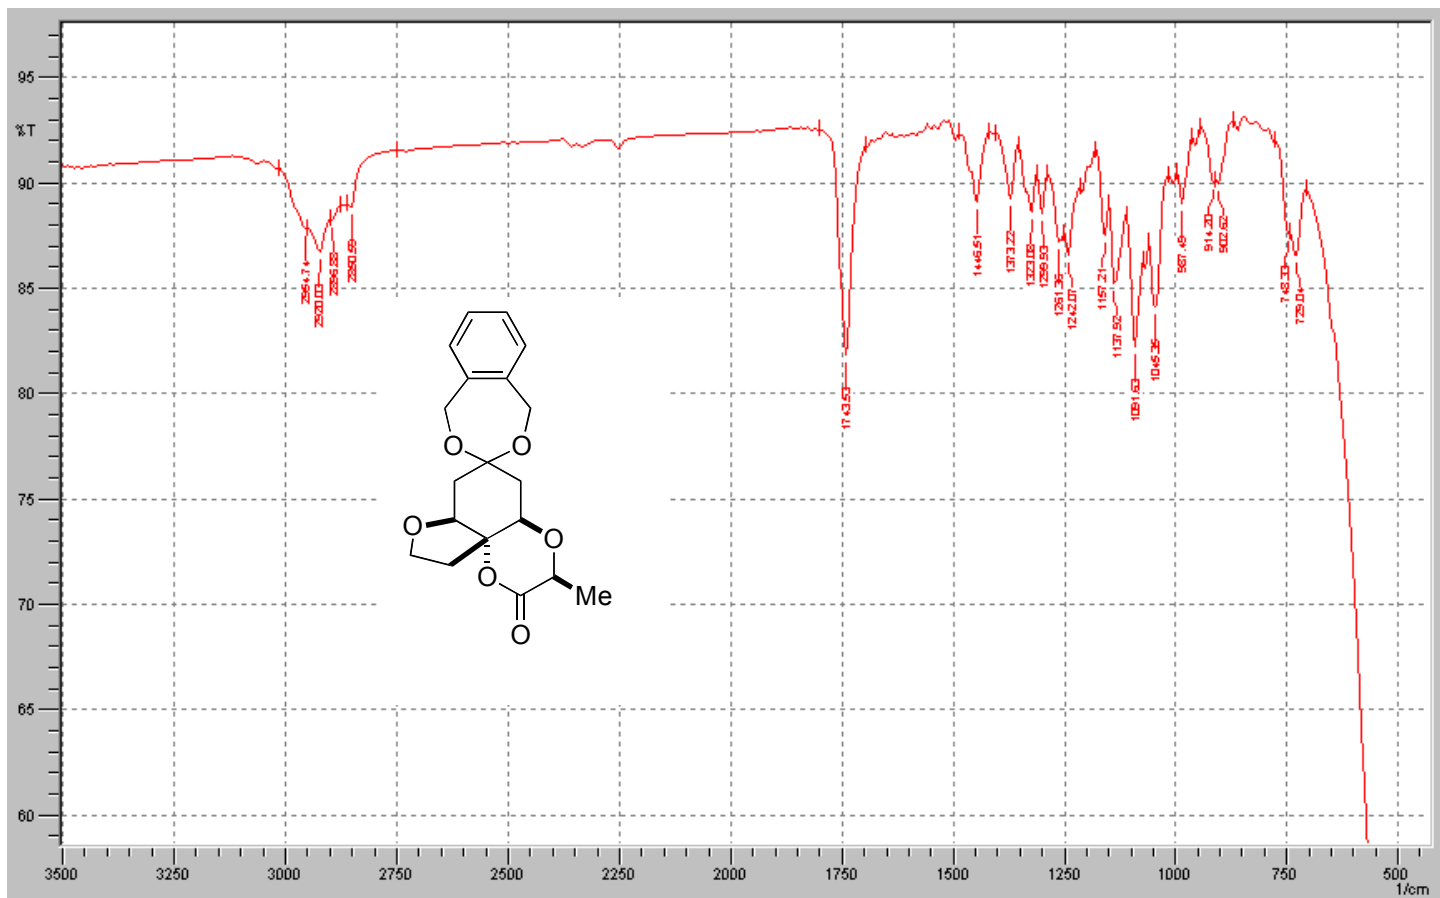

Compound 25:

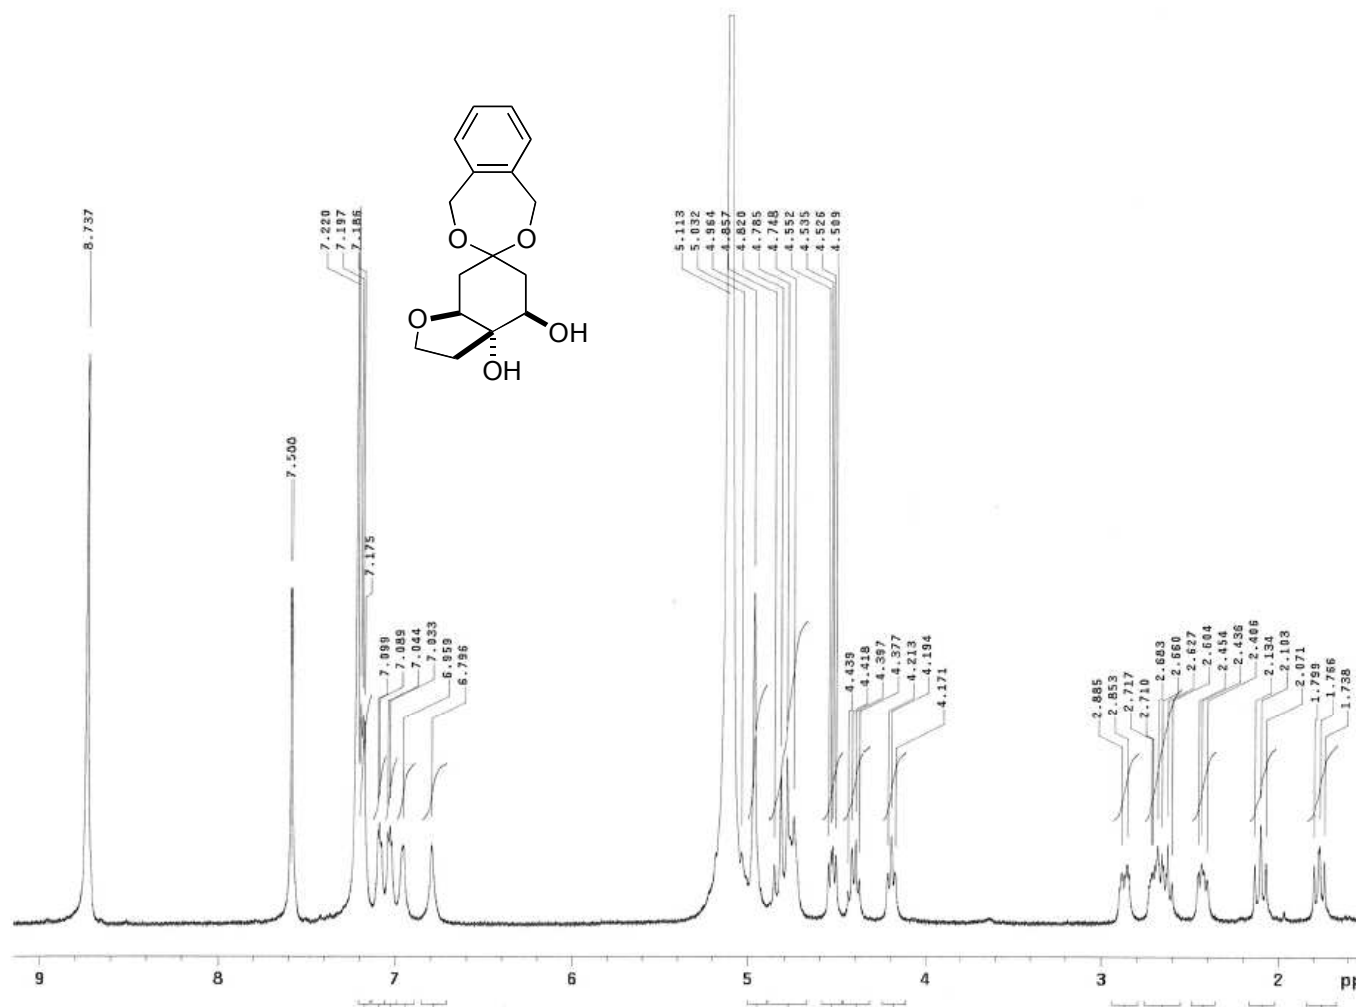

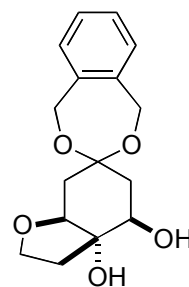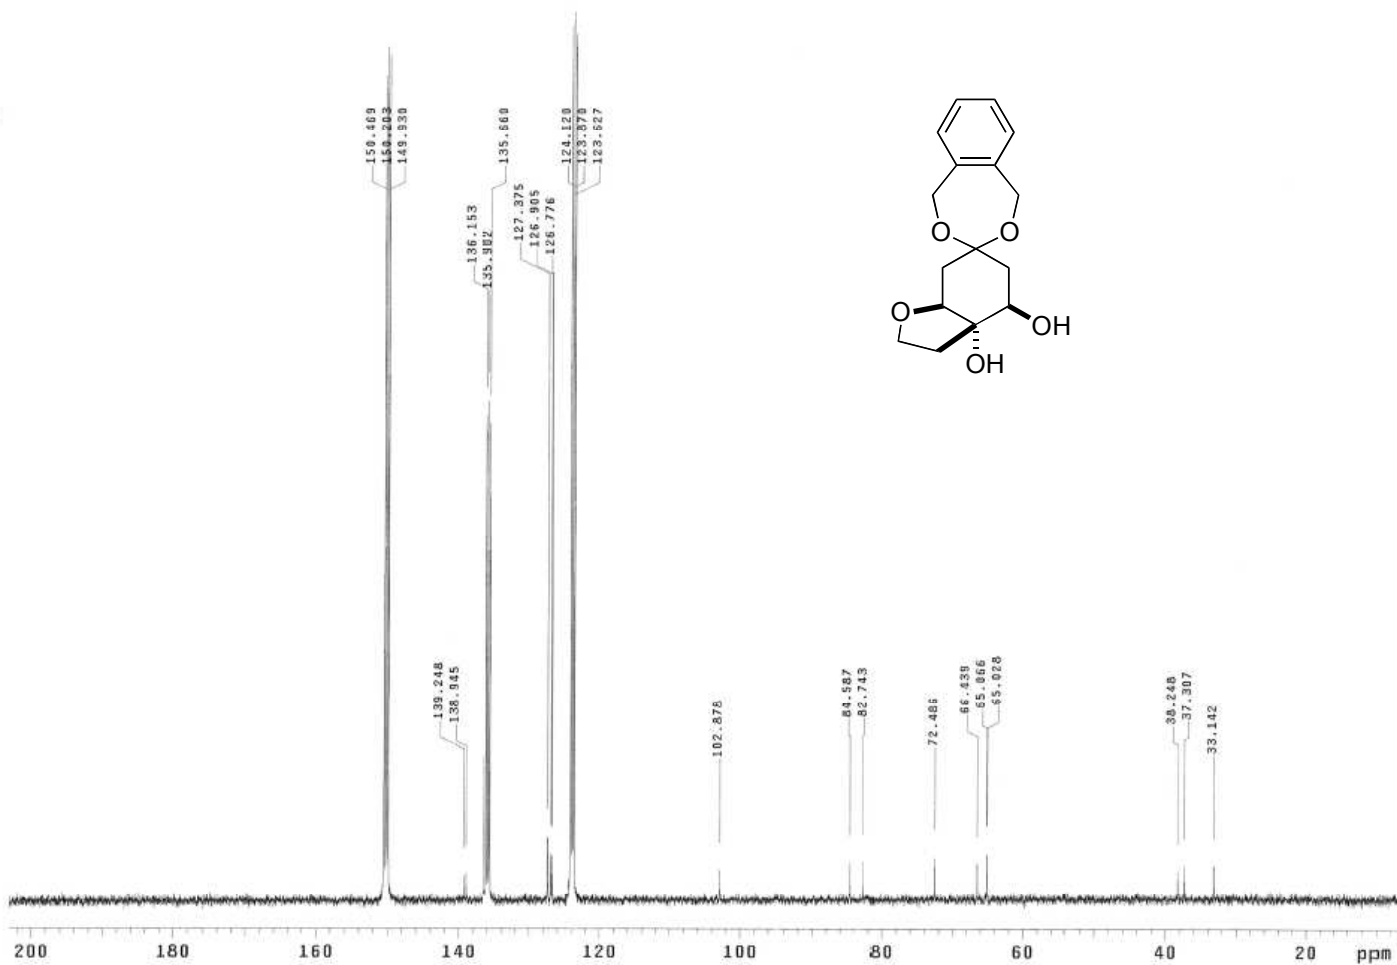

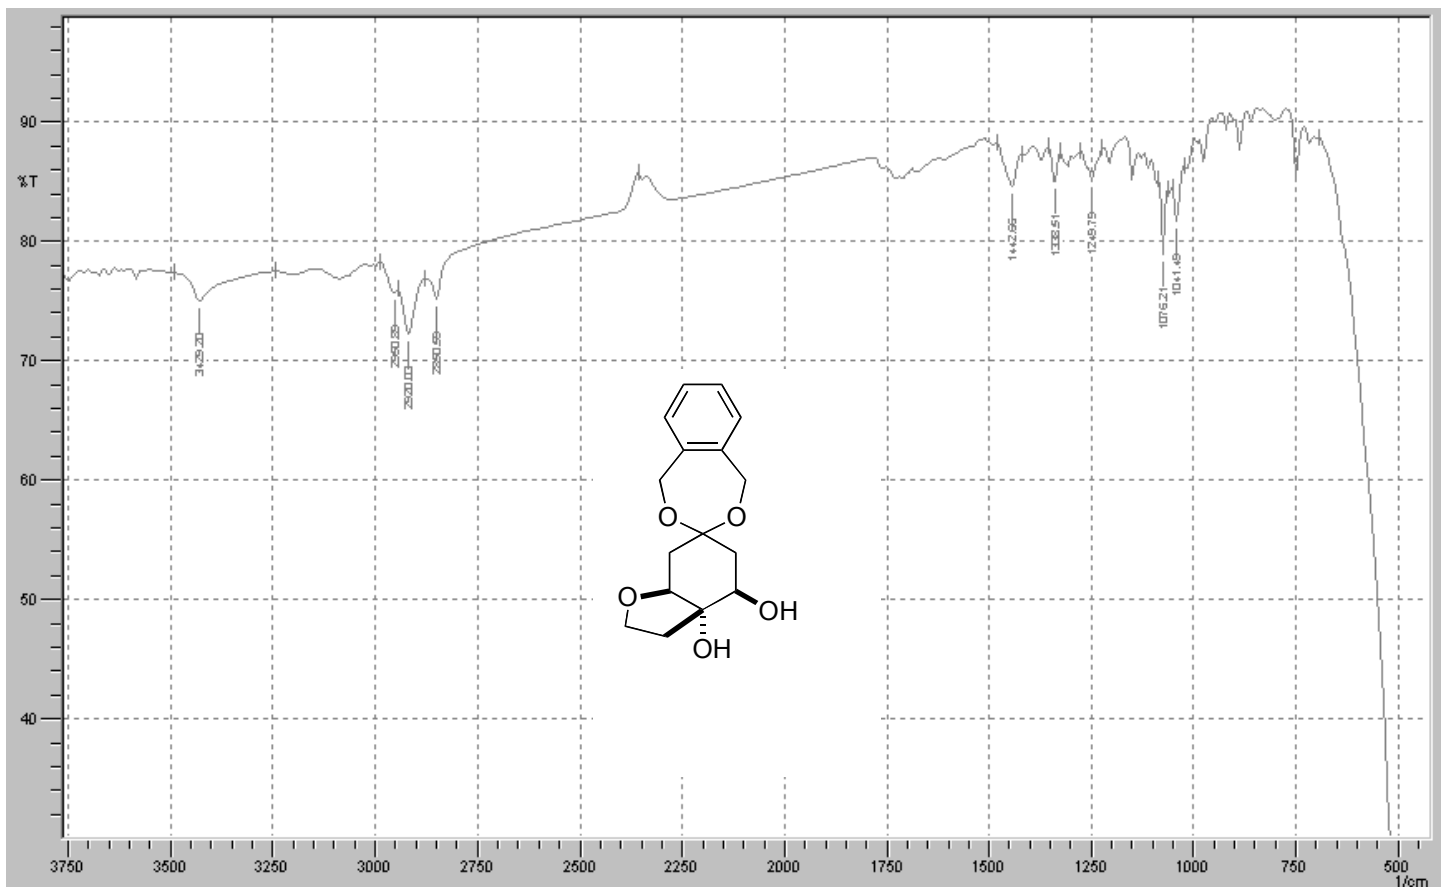

Epi-cleroindicin D (4):

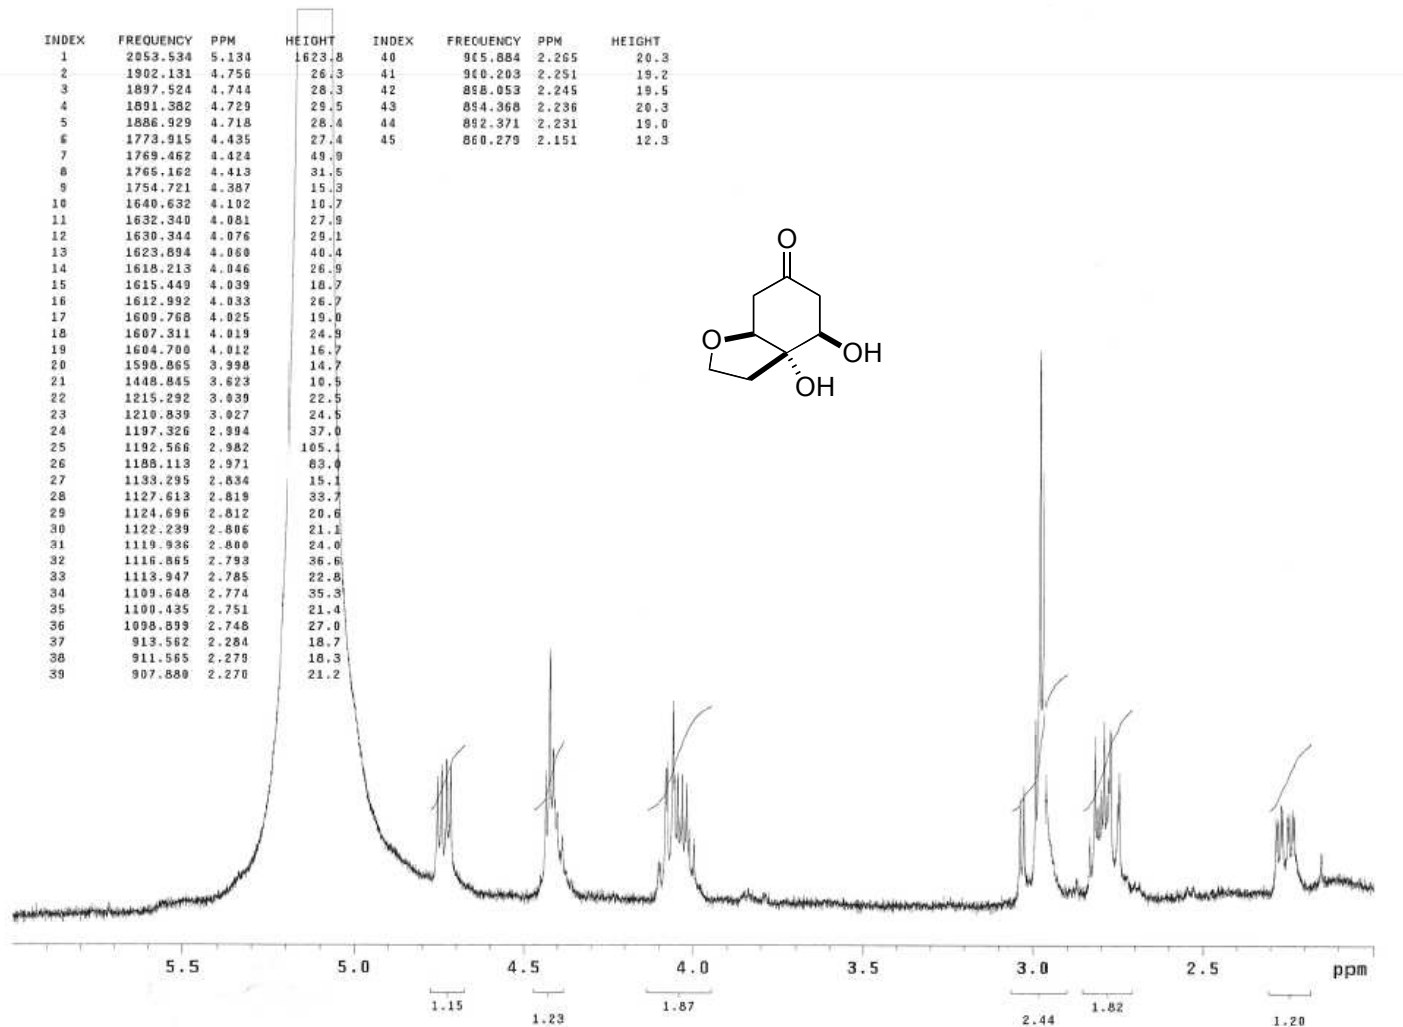

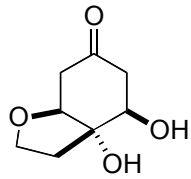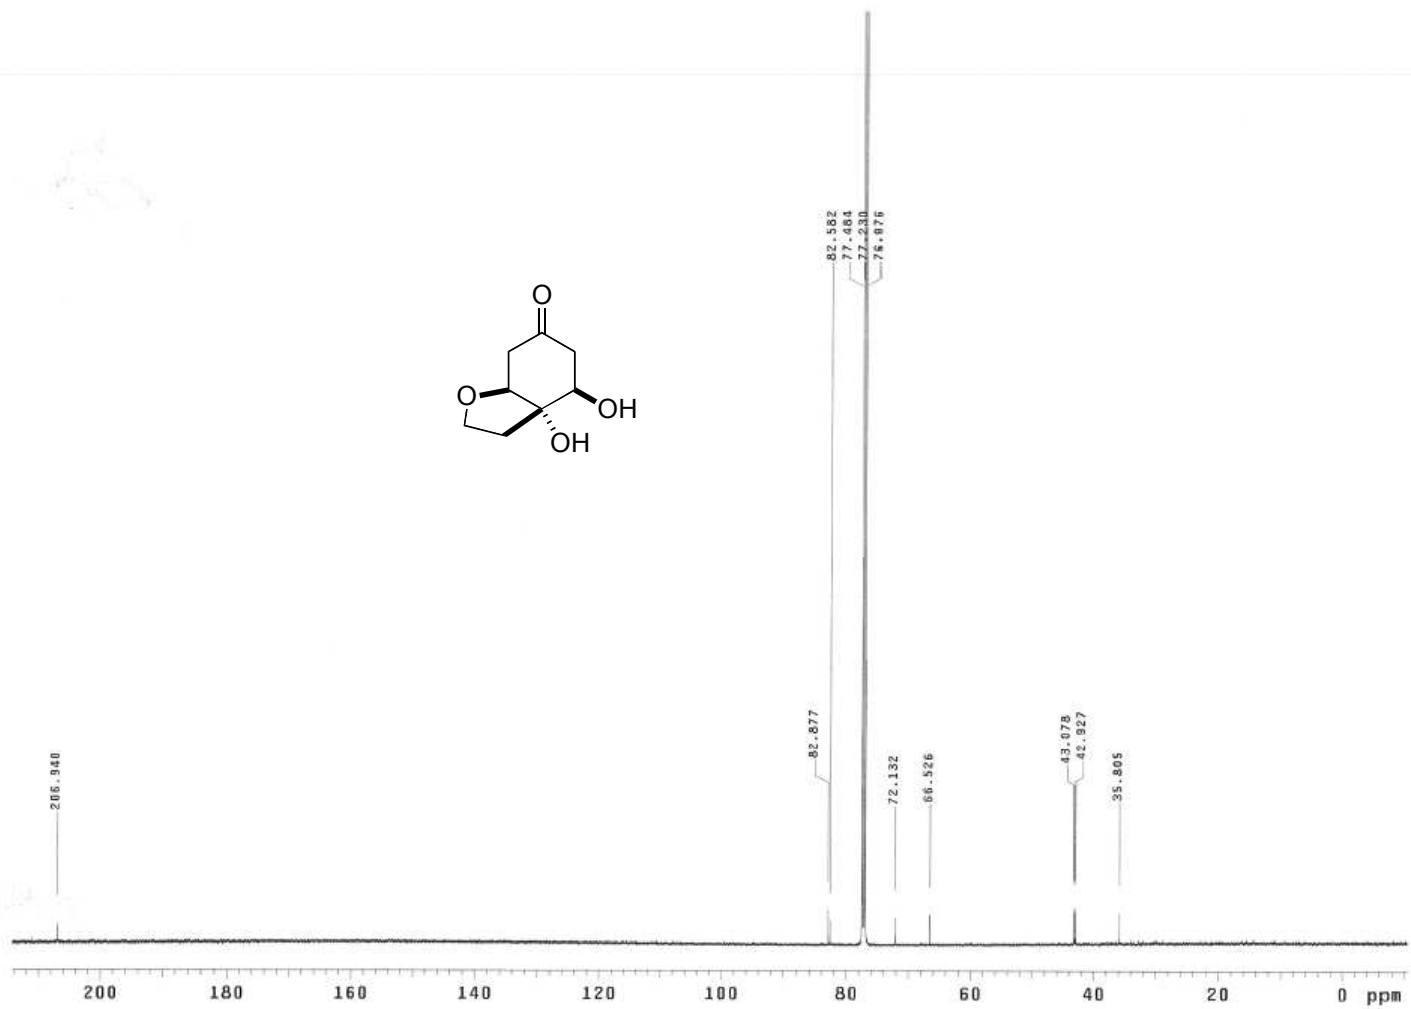



Compound 26:

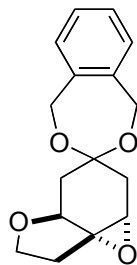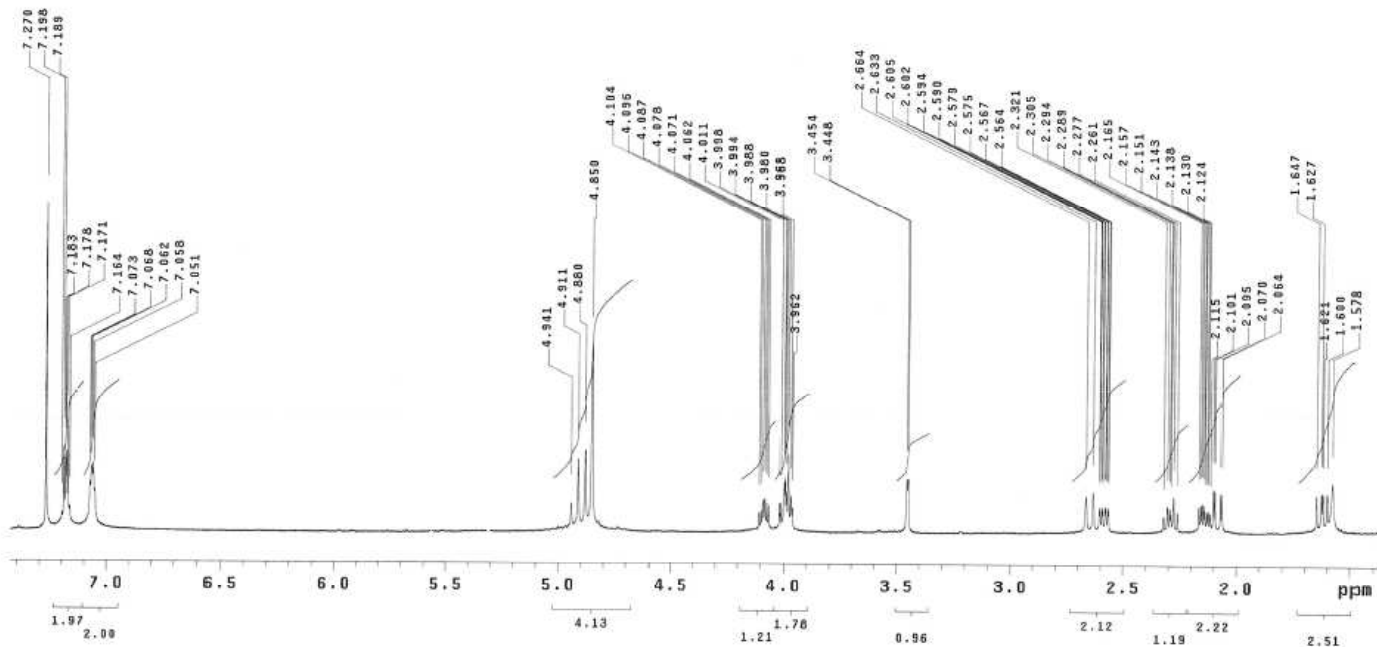

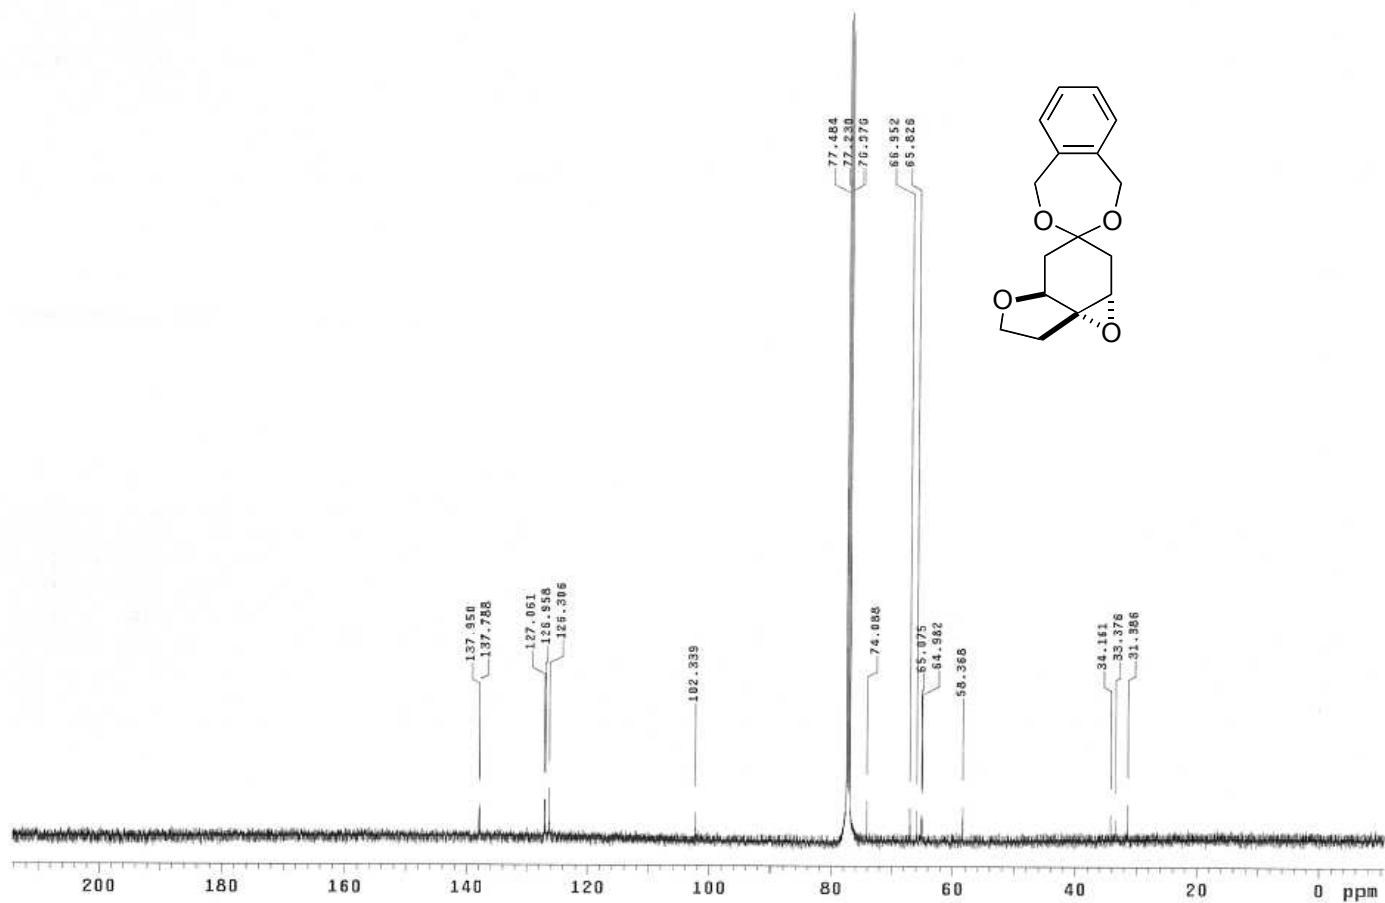

Acetate (crude):

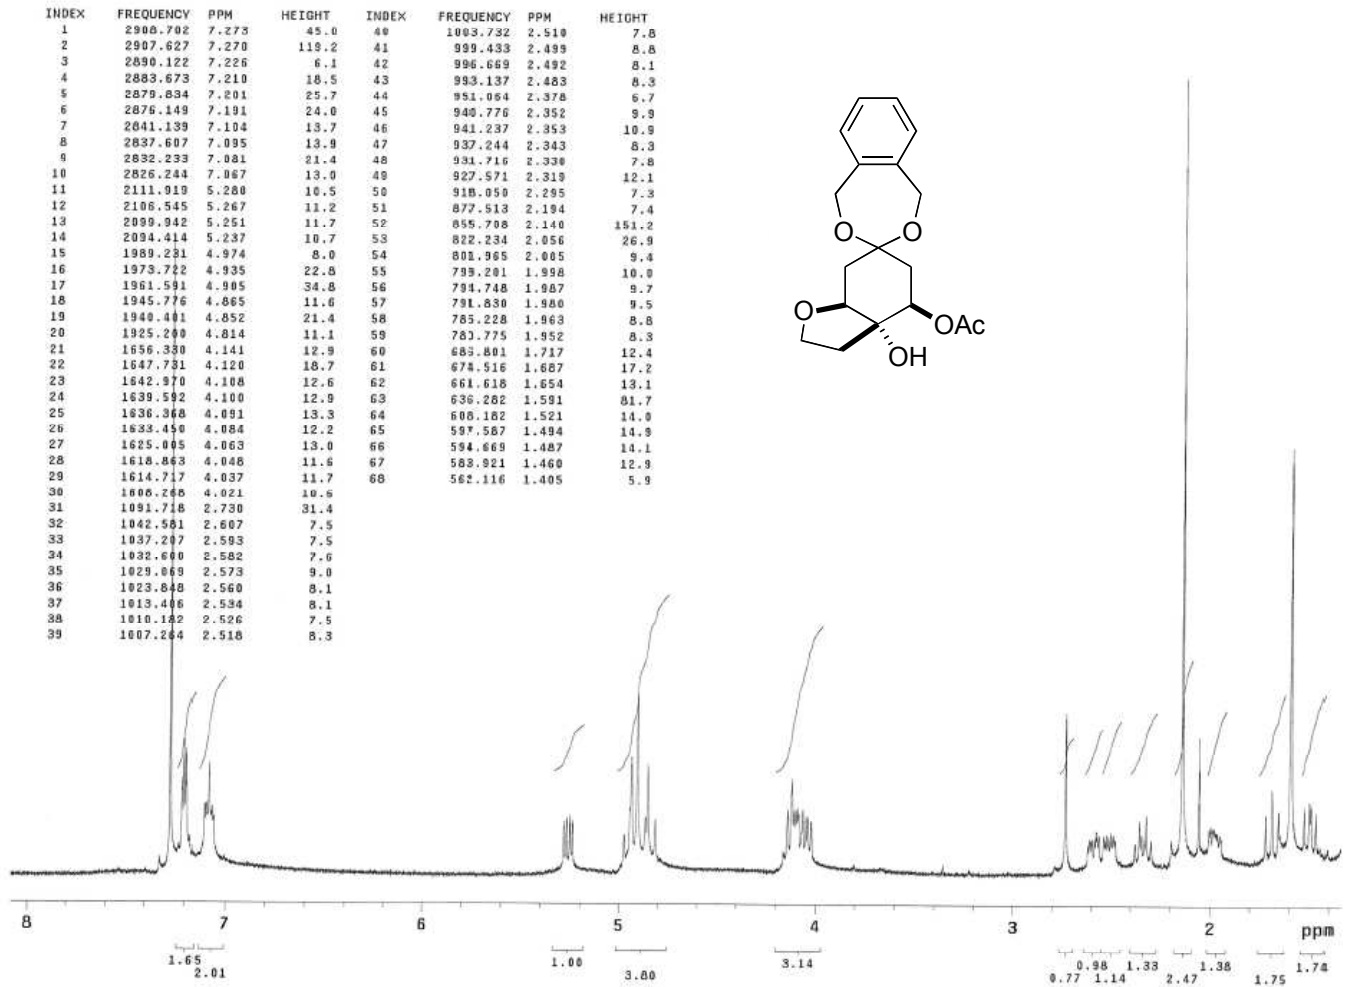

Compound 27 (crude):

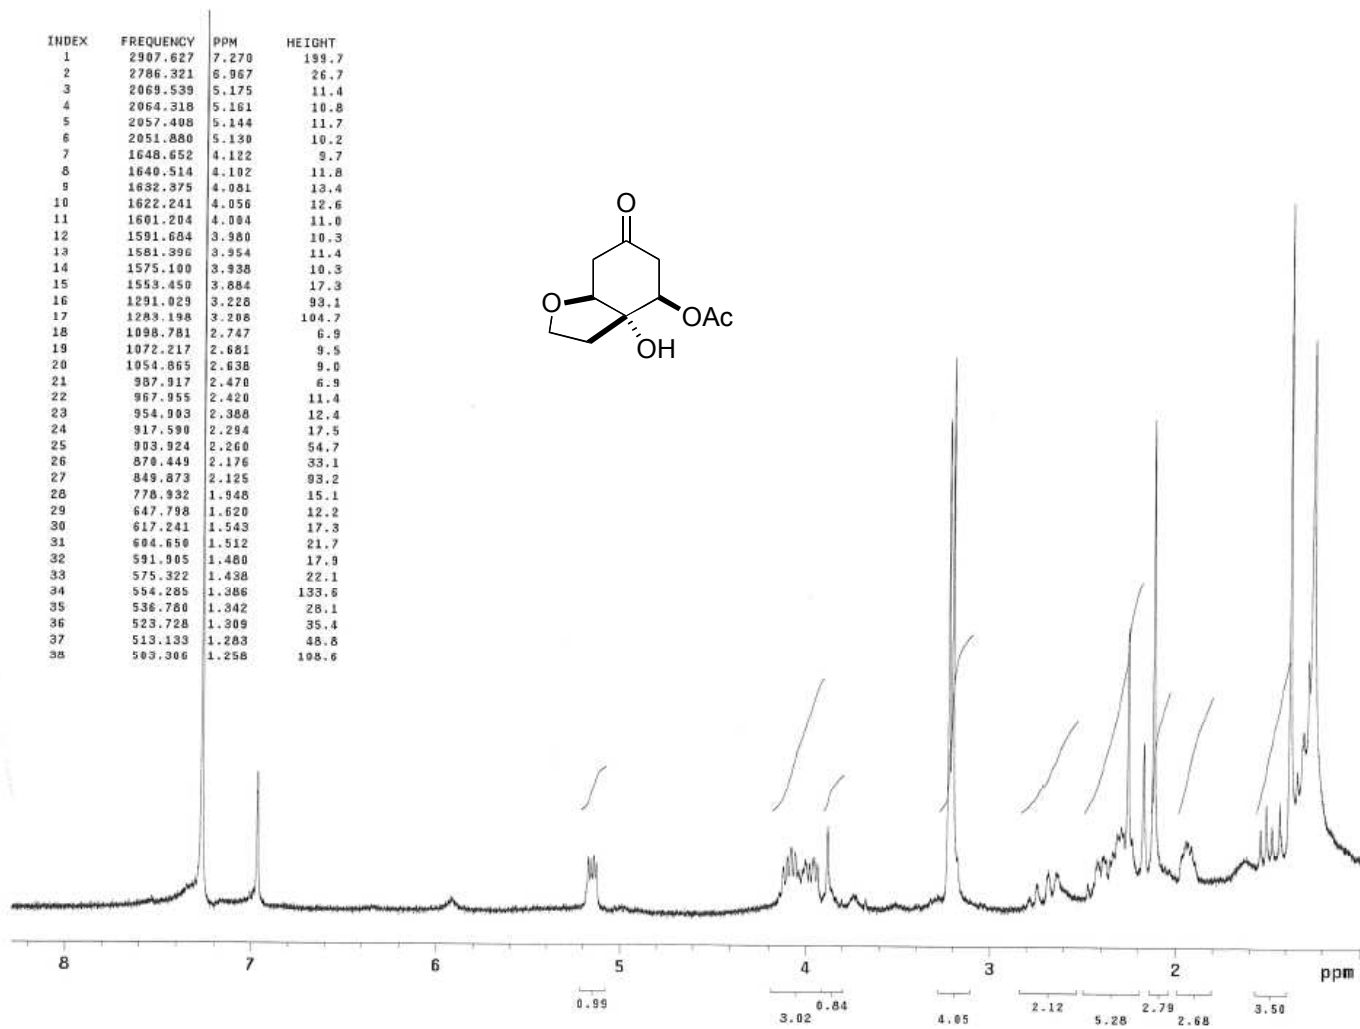

Cleroidicin F (7):

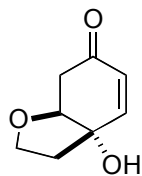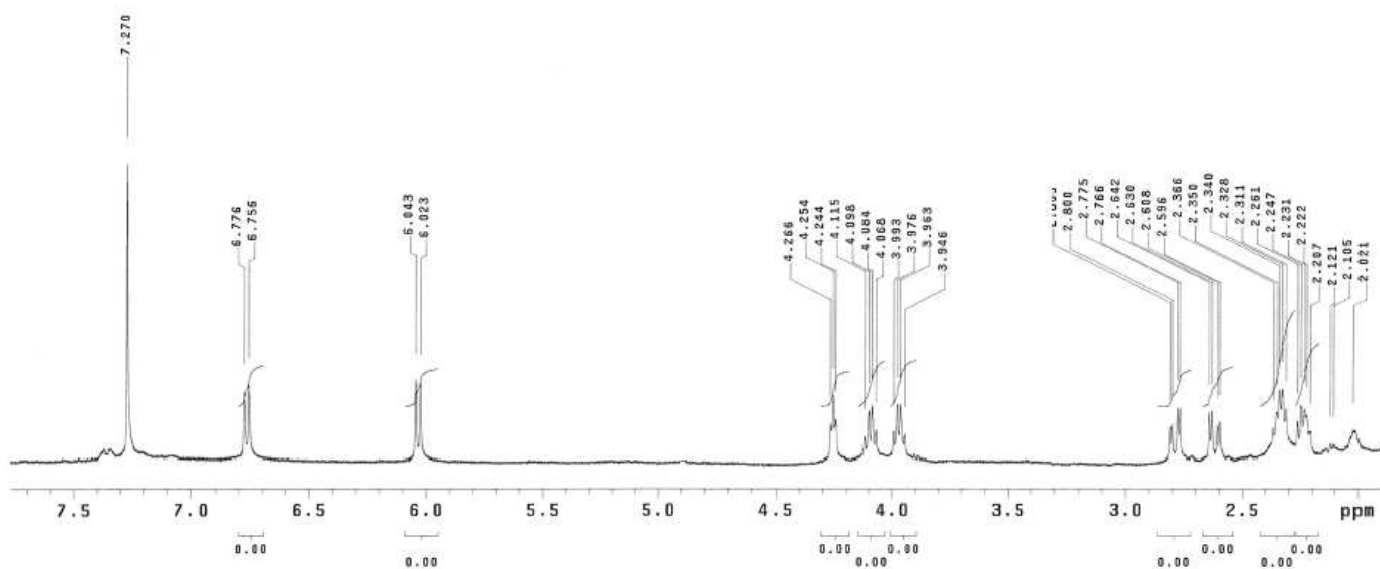

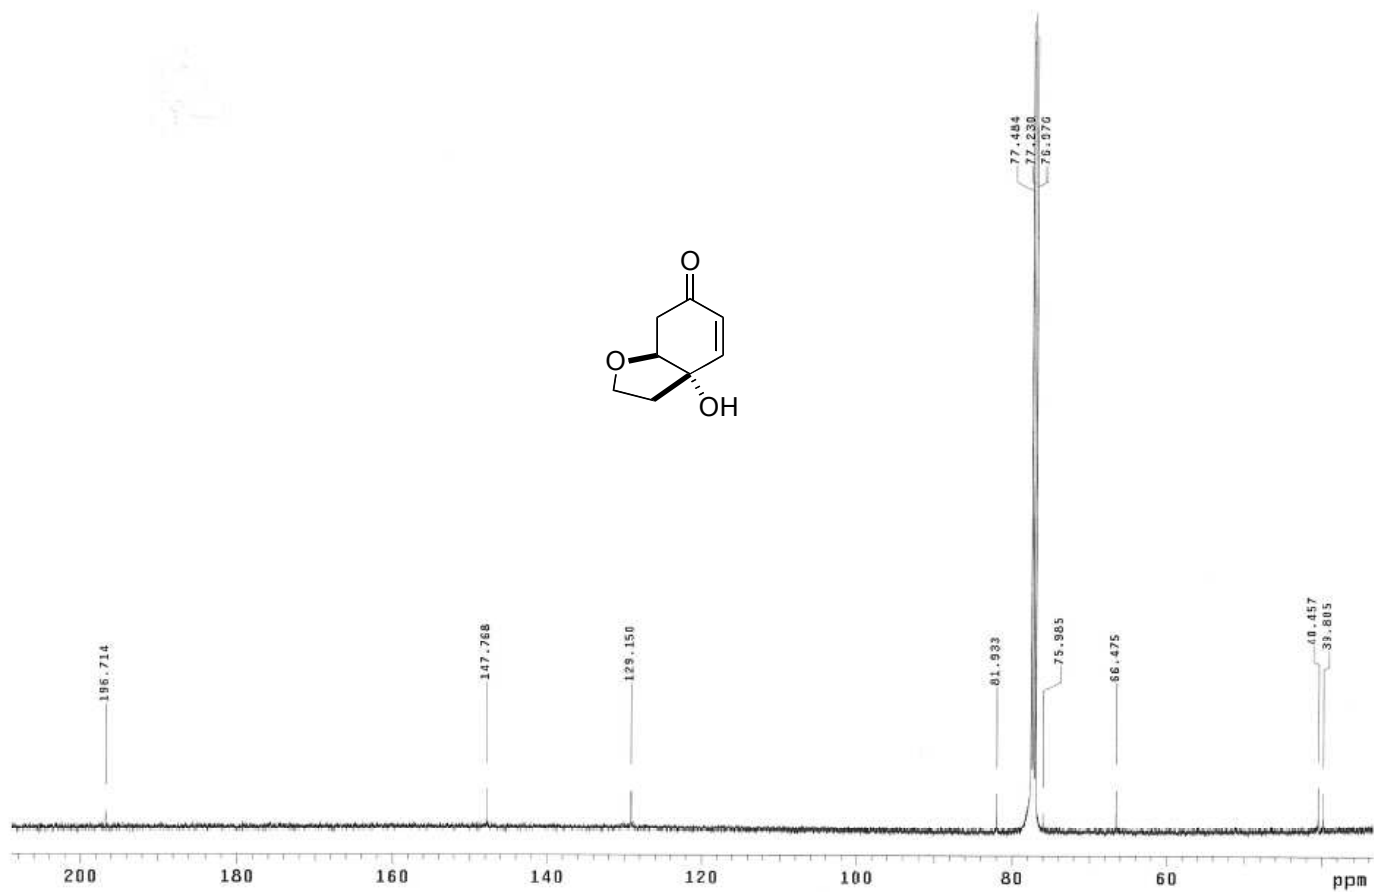

Clerioindicin C (3):

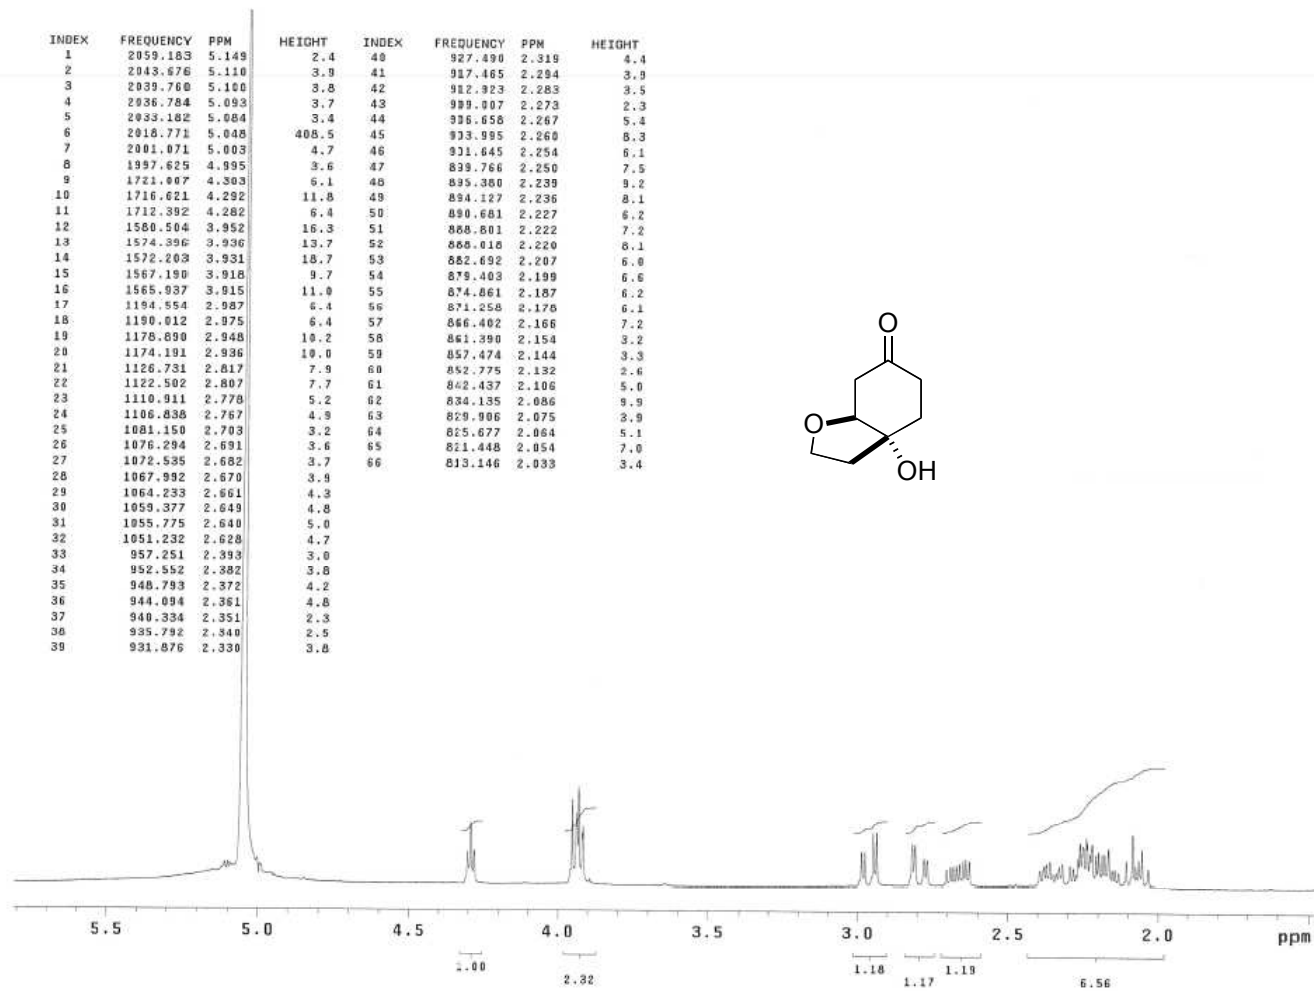

Epoxide 30:

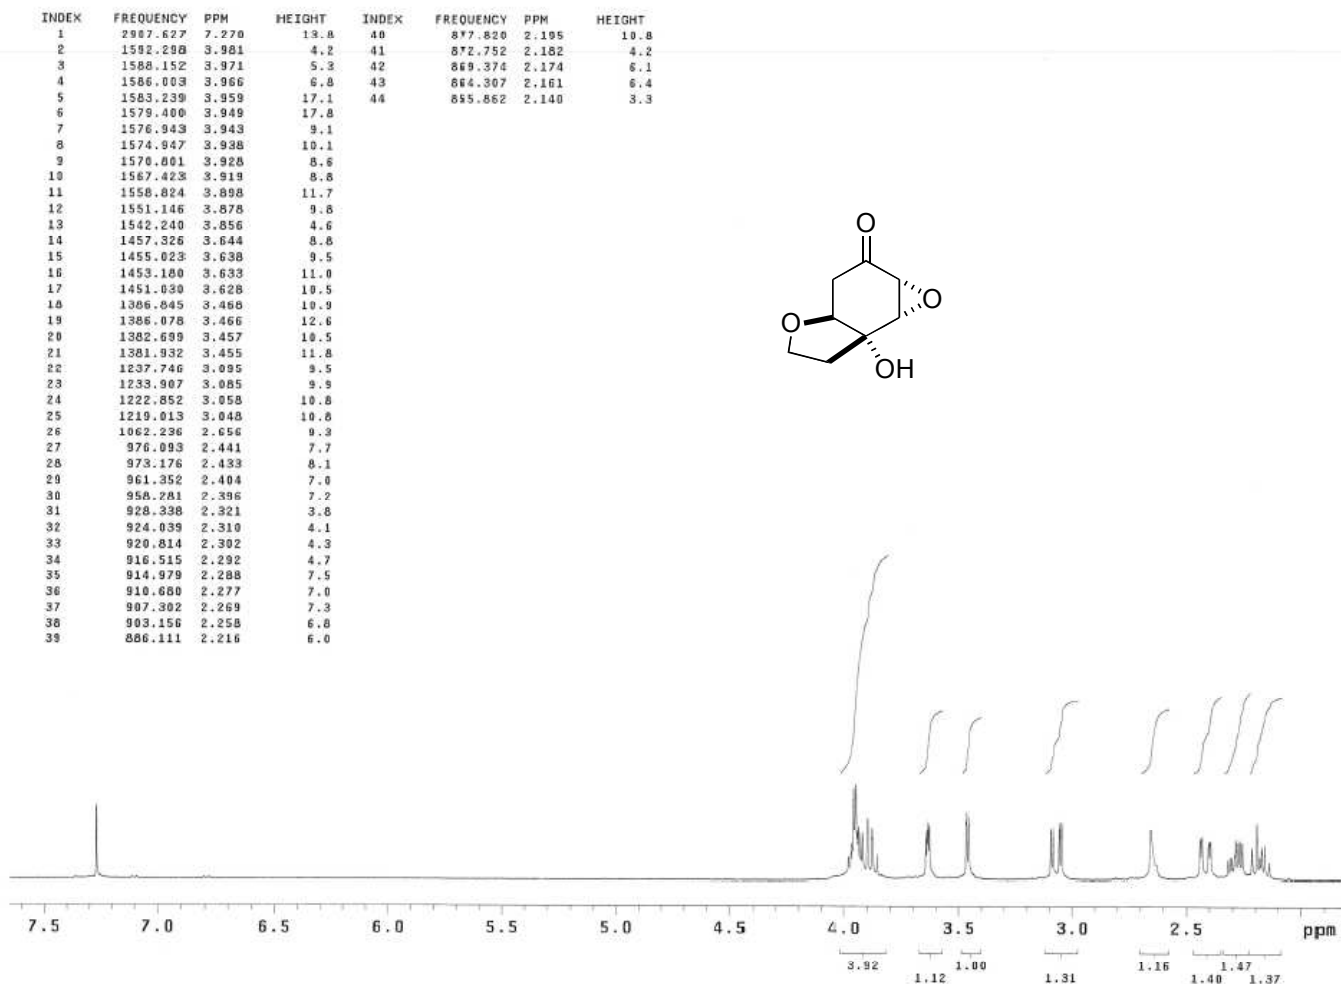



Cleroindicin D (5):

| INDEX | FREQUENCY | PPM   | HEIGHT |
|-------|-----------|-------|--------|
| 1     | 1895.221  | 4.739 | 5.8    |
| 2     | 1747.504  | 4.369 | 14.9   |
| 3     | 1743.665  | 4.360 | 15.9   |
| 4     | 1739.519  | 4.349 | 10.2   |
| 5     | 1657.215  | 4.144 | 3.9    |
| 6     | 1605.315  | 4.014 | 11.0   |
| 7     | 1604.086  | 4.011 | 11.2   |
| 8     | 1601.015  | 4.003 | 11.3   |
| 9     | 1597.176  | 3.993 | 16.9   |
| 10    | 1595.487  | 3.989 | 12.3   |
| 11    | 1592.877  | 3.983 | 9.9    |
| 12    | 1588.424  | 3.972 | 10.2   |
| 13    | 1306.041  | 3.266 | 6.3    |
| 14    | 1301.435  | 3.254 | 6.6    |
| 15    | 1209.611  | 3.224 | 8.1    |
| 16    | 1205.158  | 3.213 | 7.5    |
| 17    | 1210.056  | 3.046 | 5.1    |
| 18    | 1211.453  | 3.029 | 5.1    |
| 19    | 1201.472  | 3.004 | 8.3    |
| 20    | 1195.023  | 2.988 | 8.3    |
| 21    | 1150.785  | 2.897 | 8.2    |
| 22    | 1155.560  | 2.889 | 8.9    |
| 23    | 1142.969  | 2.850 | 10.2   |
| 24    | 1139.744  | 2.850 | 11.1   |
| 25    | 1127.306  | 2.819 | 6.0    |
| 26    | 1123.928  | 2.810 | 6.2    |
| 27    | 927.074   | 2.318 | 6.4    |
| 28    | 918.168   | 2.296 | 13.9   |
| 29    | 913.255   | 2.283 | 8.5    |
| 30    | 910.644   | 2.277 | 12.4   |
| 31    | 906.345   | 2.266 | 7.9    |

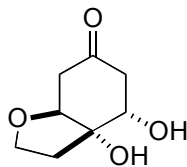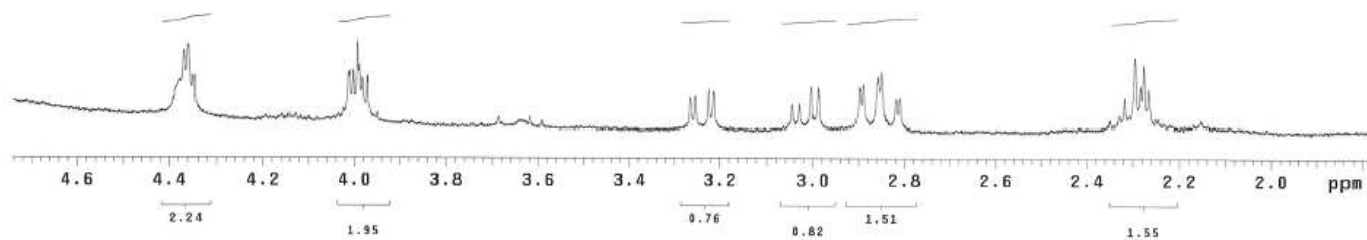

Compound 8/6 = 10/1

| INDEX | FREQUENCY | PPM   | HEIGHT |
|-------|-----------|-------|--------|
| 1     | 1716.464  | 4.292 | 5.9    |
| 2     | 1708.476  | 4.272 | 10.8   |
| 3     | 1700.174  | 4.251 | 11.1   |
| 4     | 1696.415  | 4.242 | 7.1    |
| 5     | 1690.619  | 4.227 | 7.4    |
| 6     | 1687.017  | 4.218 | 6.8    |
| 7     | 1681.221  | 4.204 | 6.3    |
| 8     | 1642.845  | 4.108 | 5.8    |
| 9     | 1639.086  | 4.098 | 6.2    |
| 10    | 1633.447  | 4.084 | 7.7    |
| 11    | 1631.098  | 4.078 | 7.5    |
| 12    | 1625.459  | 4.064 | 6.7    |
| 13    | 1621.700  | 4.055 | 6.7    |
| 14    | 977.770   | 2.445 | 4.8    |
| 15    | 934.069   | 2.335 | 4.6    |
| 16    | 925.454   | 2.314 | 6.9    |
| 17    | 921.381   | 2.304 | 6.7    |
| 18    | 916.056   | 2.290 | 8.1    |
| 19    | 912.140   | 2.281 | 7.6    |
| 20    | 903.838   | 2.260 | 4.4    |
| 21    | 867.029   | 2.168 | 5.8    |
| 22    | 822.701   | 2.057 | 5.5    |
| 23    | 818.472   | 2.046 | 5.3    |
| 24    | 811.110   | 2.028 | 7.4    |
| 25    | 808.917   | 2.023 | 7.8    |
| 26    | 807.037   | 2.018 | 7.1    |
| 27    | 804.688   | 2.012 | 7.1    |
| 28    | 800.772   | 2.002 | 5.2    |
| 29    | 797.169   | 1.993 | 7.9    |
| 30    | 792.940   | 1.983 | 6.3    |
| 31    | 787.771   | 1.970 | 7.1    |
| 32    | 740.467   | 1.851 | 5.9    |
| 33    | 737.178   | 1.843 | 4.5    |
| 34    | 730.756   | 1.827 | 4.7    |
| 35    | 727.623   | 1.819 | 5.6    |
| 36    | 717.755   | 1.795 | 4.9    |

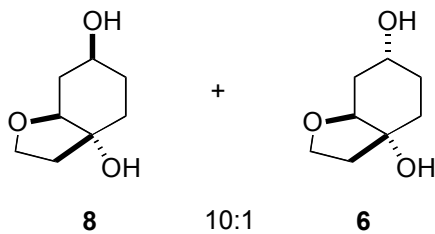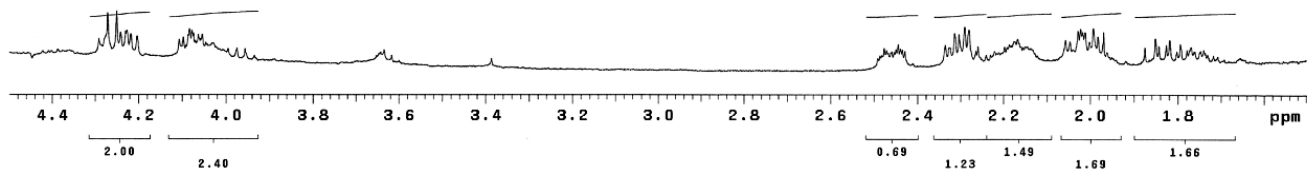

Compound 6/8 = 2/1:

| INDEX | FREQUENCY | PPM   | HEIGHT | INDEX | FREQUENCY | PPM   | HEIGHT |
|-------|-----------|-------|--------|-------|-----------|-------|--------|
| 1     | 1743.875  | 4.360 | 12.7   | 40    | 807.664   | 2.019 | 12.5   |
| 2     | 1710.669  | 4.277 | 18.3   | 41    | 804.688   | 2.012 | 12.3   |
| 3     | 1700.331  | 4.251 | 13.0   | 42    | 797.326   | 1.994 | 9.6    |
| 4     | 1696.728  | 4.242 | 10.5   | 43    | 788.241   | 1.971 | 7.7    |
| 5     | 1691.089  | 4.228 | 10.6   | 44    | 780.879   | 1.952 | 7.6    |
| 6     | 1687.330  | 4.219 | 10.2   |       |           |       |        |
| 7     | 1681.065  | 4.203 | 9.7    |       |           |       |        |
| 8     | 1642.219  | 4.106 | 10.3   |       |           |       |        |
| 9     | 1637.363  | 4.094 | 10.9   |       |           |       |        |
| 10    | 1633.291  | 4.084 | 14.6   |       |           |       |        |
| 11    | 1628.592  | 4.072 | 14.4   |       |           |       |        |
| 12    | 1623.736  | 4.060 | 13.8   |       |           |       |        |
| 13    | 1619.037  | 4.048 | 12.8   |       |           |       |        |
| 14    | 1598.674  | 3.997 | 10.2   |       |           |       |        |
| 15    | 1590.372  | 3.976 | 14.4   |       |           |       |        |
| 16    | 1582.854  | 3.958 | 13.8   |       |           |       |        |
| 17    | 1574.396  | 3.936 | 8.1    |       |           |       |        |
| 18    | 988.265   | 2.471 | 6.0    |       |           |       |        |
| 19    | 975.891   | 2.440 | 8.1    |       |           |       |        |
| 20    | 930.153   | 2.326 | 4.4    |       |           |       |        |
| 21    | 925.611   | 2.314 | 6.2    |       |           |       |        |
| 22    | 919.815   | 2.300 | 8.8    |       |           |       |        |
| 23    | 915.899   | 2.290 | 11.2   |       |           |       |        |
| 24    | 912.453   | 2.281 | 9.5    |       |           |       |        |
| 25    | 910.260   | 2.276 | 9.4    |       |           |       |        |
| 26    | 906.031   | 2.265 | 12.2   |       |           |       |        |
| 27    | 901.802   | 2.255 | 8.8    |       |           |       |        |
| 28    | 896.320   | 2.241 | 10.3   |       |           |       |        |
| 29    | 892.090   | 2.231 | 11.0   |       |           |       |        |
| 30    | 888.488   | 2.222 | 13.5   |       |           |       |        |
| 31    | 884.415   | 2.211 | 12.6   |       |           |       |        |
| 32    | 879.246   | 2.198 | 15.8   |       |           |       |        |
| 33    | 875.017   | 2.188 | 15.0   |       |           |       |        |
| 34    | 869.692   | 2.175 | 13.6   |       |           |       |        |
| 35    | 867.185   | 2.168 | 14.5   |       |           |       |        |
| 36    | 824.424   | 2.061 | 10.4   |       |           |       |        |
| 37    | 819.568   | 2.049 | 12.4   |       |           |       |        |
| 38    | 816.435   | 2.041 | 11.8   |       |           |       |        |
| 39    | 811.266   | 2.028 | 14.3   |       |           |       |        |

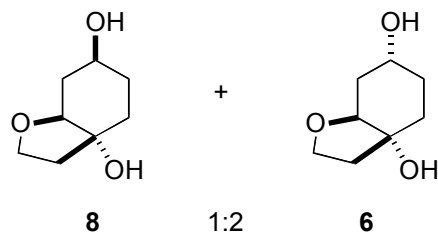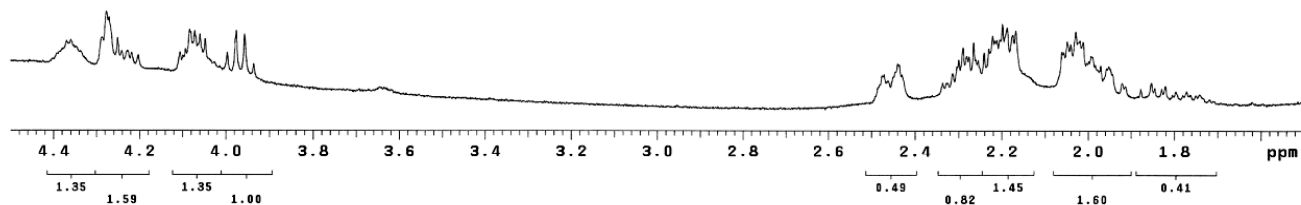

## V. References

- (i) (a) Tian, J.; Zhao, Q.-S.; Zhang, H.-J.; Lin, Z.W.; Sun, H.-D. *J. Nat. Prod.* **1997**, *60*, 766-769. (b) Hase, T.; Kawamoto, Y.; Kasai, R.; Yamasaki, K.; Pichensoonthon, C. *Phytochemistry* **1995**, *39*, 235-241.
- (ii) Barradas, S.; Carreño, González-López, M.; Latorre, A.; Urbano, A. *Org. Lett.* **2007**, *9*, 5019-5022.
